# Supplementary material for: First Look at the Venom of Naja ashei
Source: MDPI journal article supplement (doi:10.3390/molecules23030609), 2018-03-08
Supplement: s1 [file s1]

## SVMP parentmass 1280.722

## Spectrum Analysis Report

|                  |          |                   |          |                     |       |                  |          |
|------------------|----------|-------------------|----------|---------------------|-------|------------------|----------|
| Sequence Name:   |          | Parentmass:       | 1280.722 | Mass Error:         | 0.138 | MH+ (mono):      | 1280.583 |
| MH+ (avg):       | 1281.415 | Threshold (a.i.): | 0.000    | Tolerance (Da):     | 0.700 | Number of Peaks: | 42       |
| Above Threshold: | 42       | Assigned Peaks:   | 26       | Not assigned Peaks: | 16    |                  |          |

Abs. Int. \* 1000

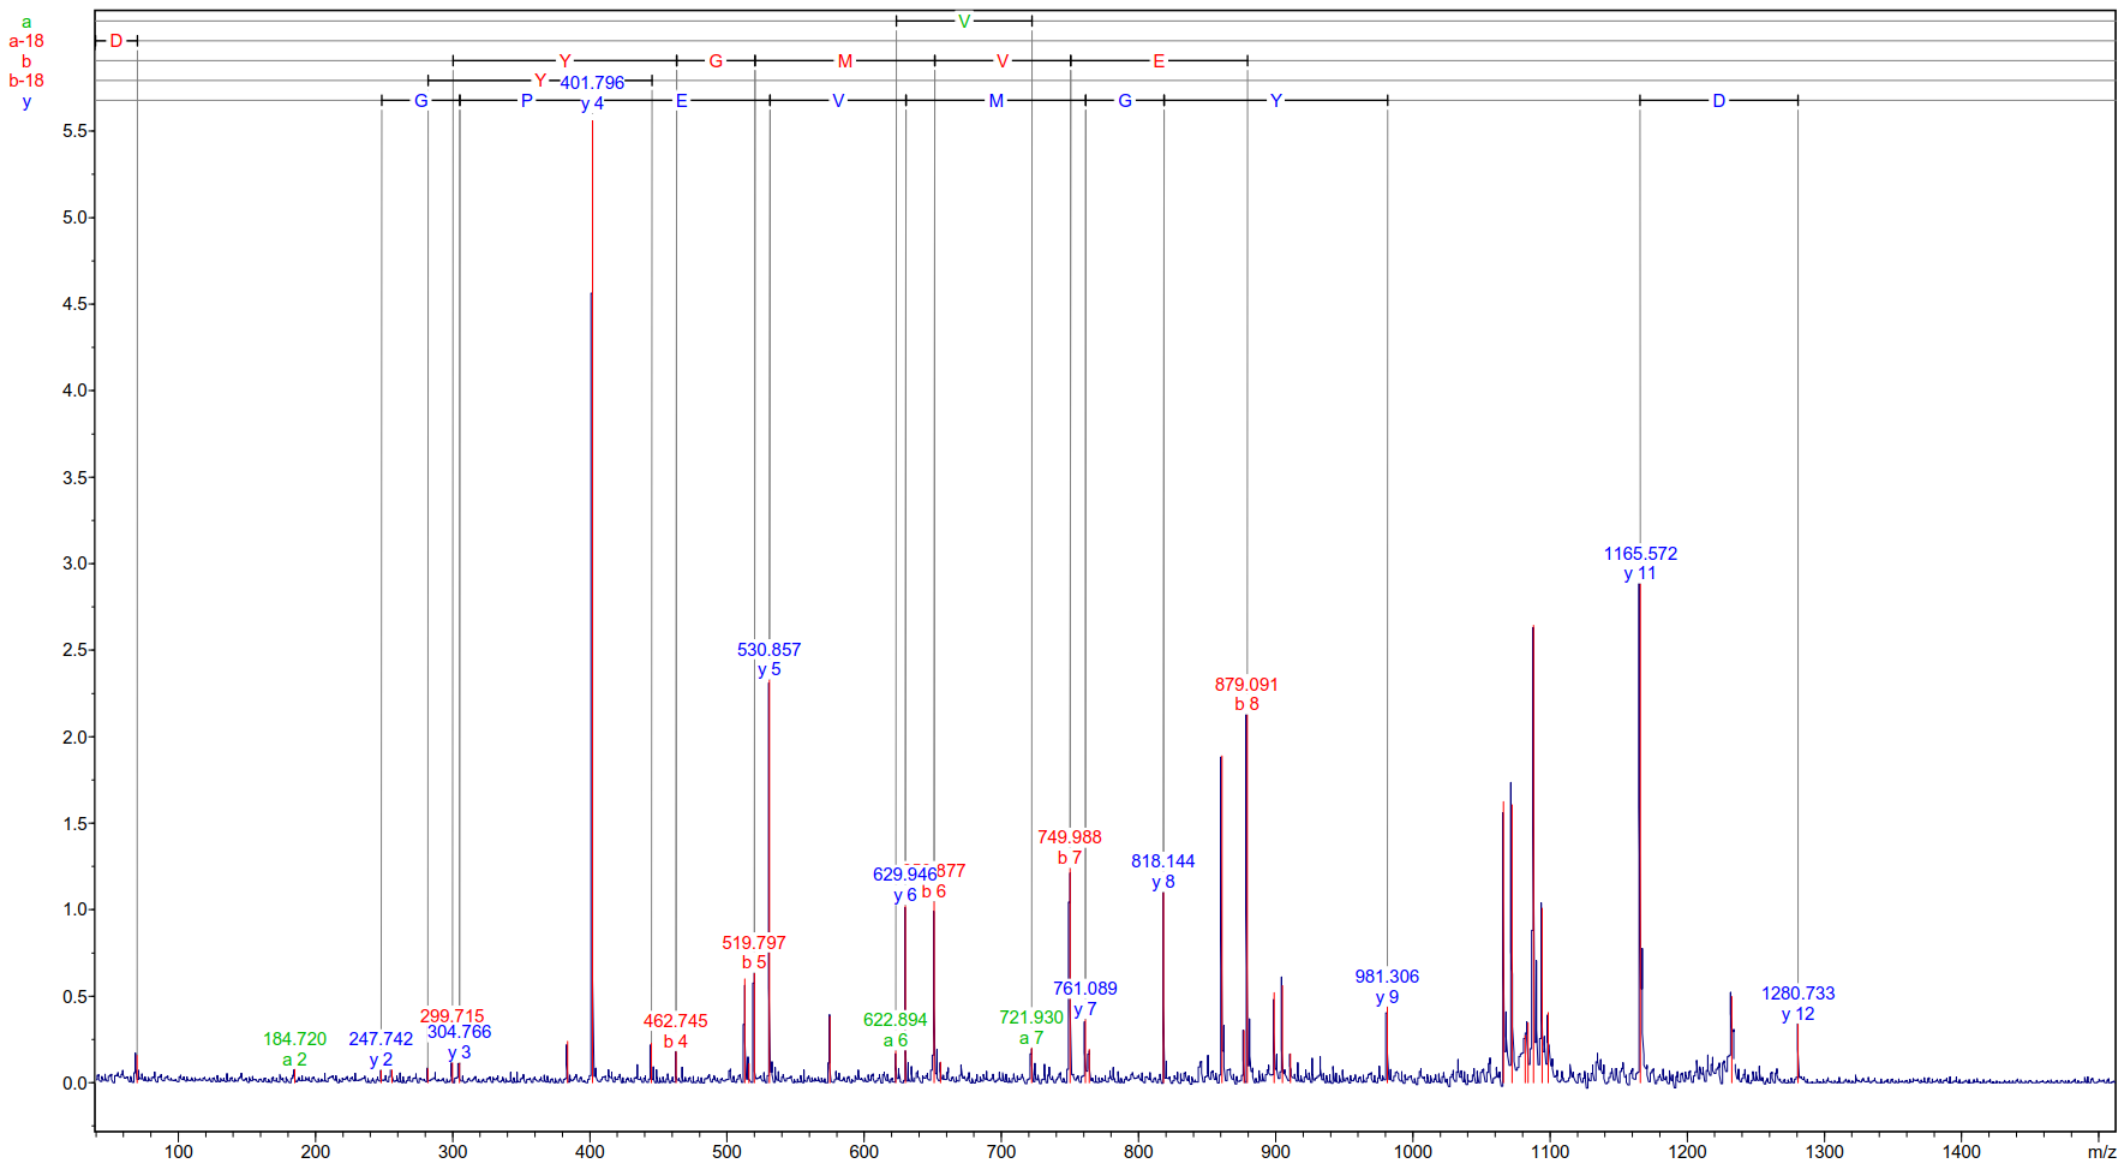

## Spectrum Analysis Report

### Display Parameter:

|                   |          |                     |       |                  |          |                  |          |
|-------------------|----------|---------------------|-------|------------------|----------|------------------|----------|
| Parentmass:       | 1280.722 | Mass Error:         | 0.138 | MH+ (mono):      | 1280.583 | MH+ (avg):       | 1281.415 |
| Threshold (a.i.): | 0.000    | Tolerance (Da):     | 0.700 | Number of Peaks: | 42       | Above Threshold: | 42       |
| Assigned Peaks:   | 26       | Not assigned Peaks: | 16    |                  |          |                  |          |

### Peaklist:

| Peak | Mass     | Intensity |
|------|----------|-----------|------|----------|-----------|------|----------|-----------|------|----------|-----------|------|----------|-----------|
| 1    | 69.774   | 160.779   | 2    | 184.720  | 79.616    | 3    | 247.742  | 75.660    | 4    | 255.685  | 131.149   | 5    | 281.708  | 83.975    |
| 6    | 299.715  | 211.987   | 7    | 304.766  | 116.691   | 8    | 383.783  | 239.234   | 9    | 401.796  | 5600.690  | 10   | 444.762  | 232.287   |
| 11   | 462.745  | 181.740   | 12   | 512.854  | 600.917   | 13   | 515.911  | 109.819   | 14   | 519.797  | 635.928   | 15   | 530.857  | 2329.960  |
| 16   | 574.848  | 384.478   | 17   | 622.894  | 186.002   | 18   | 629.946  | 1026.185  | 19   | 650.877  | 1047.568  | 20   | 655.617  | 119.095   |
| 21   | 721.930  | 202.421   | 22   | 749.988  | 1240.720  | 23   | 761.089  | 366.759   | 24   | 764.007  | 192.346   | 25   | 818.144  | 1101.213  |
| 26   | 860.825  | 1888.616  | 27   | 876.834  | 302.378   | 28   | 879.091  | 2127.536  | 29   | 898.809  | 520.061   | 30   | 904.801  | 561.660   |
| 31   | 910.682  | 167.668   | 32   | 981.306  | 439.932   | 33   | 1065.926 | 1624.417  | 34   | 1072.116 | 1606.274  | 35   | 1081.835 | 273.143   |
| 36   | 1083.819 | 346.691   | 37   | 1087.884 | 2644.018  | 38   | 1094.131 | 1009.568  | 39   | 1098.532 | 406.657   | 40   | 1165.572 | 2885.102  |
| 41   | 1232.364 | 497.836   | 42   | 1280.733 | 342.255   |      |          |           |      |          |           |      |          |           |

### Calculated Masses:

DPSYGMVEPGTK

| N-Term. | Ion | a              | a-17           | a-18            | b              | b-17     | b-18           | b+18            | c        | i             | x               | y               | z        | C-Term. | Ion |
|---------|-----|----------------|----------------|-----------------|----------------|----------|----------------|-----------------|----------|---------------|-----------------|-----------------|----------|---------|-----|
| 1       | D   | 88.039         | 71.013         | <b>70.029</b>   | 116.034        | 99.008   | 98.024         | 134.045         | 133.061  | 88.039        | 173.092         | 147.113         | 130.086  | 12      | K   |
| 2       | P   | <b>185.092</b> | 168.066        | 167.082         | 213.087        | 196.060  | 195.076        | 231.098         | 230.114  | <b>70.065</b> | 274.140         | <b>248.160</b>  | 231.134  | 11      | T   |
| 3       | S   | 272.124        | <b>255.098</b> | 254.114         | <b>300.119</b> | 283.092  | <b>282.108</b> | 318.130         | 317.146  | 60.044        | 331.161         | <b>305.182</b>  | 288.155  | 10      | G   |
| 4       | Y   | 435.187        | 418.161        | 417.177         | <b>463.182</b> | 446.156  | <b>445.172</b> | 481.193         | 480.209  | 136.076       | 428.214         | <b>402.235</b>  | 385.208  | 9       | P   |
| 5       | G   | 492.209        | 475.182        | 474.198         | <b>520.204</b> | 503.177  | 502.193        | 538.214         | 537.230  | 30.034        | 557.257         | <b>531.277</b>  | 514.251  | 8       | E   |
| 6       | M   | <b>623.249</b> | 606.223        | 605.239         | <b>651.244</b> | 634.218  | 633.234        | 669.255         | 668.271  | 104.053       | 656.325         | <b>630.346</b>  | 613.319  | 7       | V   |
| 7       | V   | <b>722.318</b> | 705.291        | 704.307         | <b>750.313</b> | 733.286  | 732.302        | 768.323         | 767.339  | 72.081        | 787.365         | <b>761.386</b>  | 744.360  | 6       | M   |
| 8       | E   | 851.360        | 834.334        | 833.350         | <b>879.355</b> | 862.329  | <b>861.345</b> | 897.366         | 896.382  | 102.055       | 844.387         | <b>818.408</b>  | 801.381  | 5       | G   |
| 9       | P   | 948.413        | 931.387        | 930.403         | 976.408        | 959.382  | 958.397        | 994.419         | 993.435  | <b>70.065</b> | 1007.450        | <b>981.471</b>  | 964.444  | 4       | Y   |
| 10      | G   | 1005.435       | 988.408        | 987.424         | 1033.430       | 1016.403 | 1015.419       | 1051.440        | 1050.456 | 30.034        | <b>1094.482</b> | 1068.503        | 1051.476 | 3       | S   |
| 11      | T   | 1106.482       | 1089.456       | <b>1088.472</b> | 1134.477       | 1117.451 | 1116.467       | 1152.488        | 1151.504 | 74.060        | 1191.535        | <b>1165.556</b> | 1148.529 | 2       | P   |
| 12      | K   | 1234.577       | 1217.551       | 1216.567        | 1262.572       | 1245.546 | 1244.562       | <b>1280.583</b> | 1279.599 | 101.107       | 1306.562        | <b>1280.583</b> | 1263.556 | 1       | D   |

## SVMP parentmass 1087.732

## Spectrum Analysis Report

|                  |          |                   |          |                     |       |                  |          |
|------------------|----------|-------------------|----------|---------------------|-------|------------------|----------|
| Sequence Name:   |          | Parentmass:       | 1087.732 | Mass Error:         | 0.178 | MH+ (mono):      | 1087.554 |
| MH+ (avg):       | 1088.196 | Threshold (a.i.): | 0.000    | Tolerance (Da):     | 0.700 | Number of Peaks: | 58       |
| Above Threshold: | 58       | Assigned Peaks:   | 34       | Not assigned Peaks: | 24    |                  |          |

Abs. Int. \* 1000

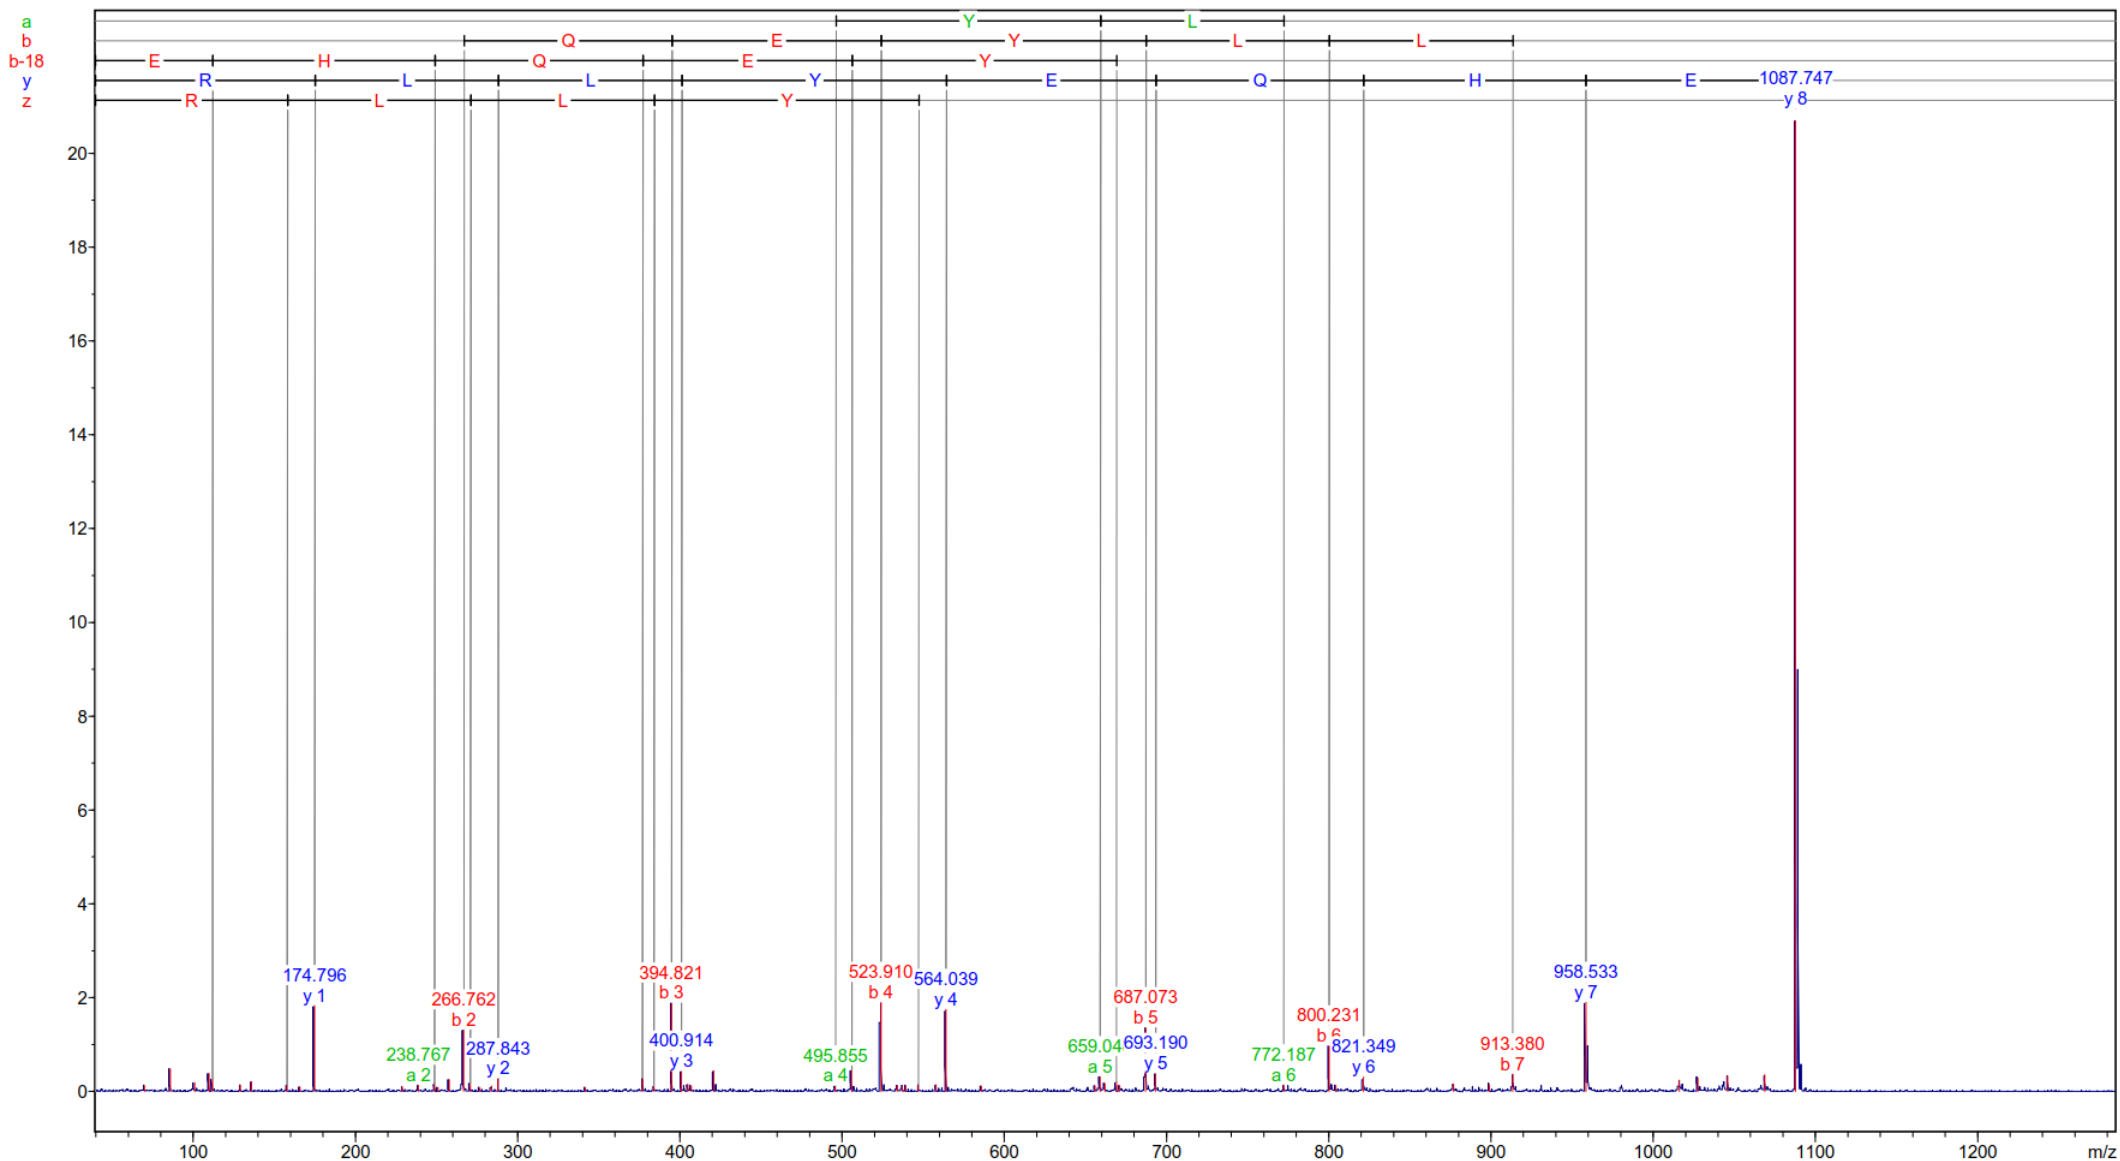

## Spectrum Analysis Report

### Display Parameter:

|                         |                        |                      |
|-------------------------|------------------------|----------------------|
| Parentmass: 1087.732    | Mass Error: 0.178      | MH+ (mono): 1087.554 |
| Threshold (a.i.): 0.000 | Tolerance (Da): 0.700  | MH+ (avg): 1088.196  |
| Assigned Peaks: 34      | Not assigned Peaks: 24 | Above Threshold: 58  |

### Peaklist:

| Peak | Mass     | Intensity |
|------|----------|-----------|------|----------|-----------|------|----------|-----------|------|----------|-----------|------|----------|-----------|
| 1    | 69.851   | 123.125   | 2    | 85.836   | 478.636   | 3    | 100.805  | 186.281   | 4    | 109.792  | 378.274   | 5    | 111.797  | 252.692   |
| 6    | 128.803  | 137.018   | 7    | 135.775  | 205.202   | 8    | 157.775  | 133.173   | 9    | 165.740  | 96.123    | 10   | 174.796  | 1831.344  |
| 11   | 228.767  | 97.685    | 12   | 238.767  | 134.192   | 13   | 248.756  | 163.866   | 14   | 250.879  | 84.177    | 15   | 257.759  | 251.881   |
| 16   | 266.762  | 1315.614  | 17   | 270.835  | 167.385   | 18   | 276.789  | 87.310    | 19   | 283.781  | 110.285   | 20   | 287.843  | 277.961   |
| 21   | 341.862  | 87.804    | 22   | 376.830  | 284.164   | 23   | 383.901  | 113.757   | 24   | 394.821  | 1887.169  | 25   | 400.914  | 433.002   |
| 26   | 404.841  | 156.134   | 27   | 407.033  | 118.662   | 28   | 420.847  | 438.589   | 29   | 495.855  | 122.901   | 30   | 505.895  | 456.975   |
| 31   | 523.910  | 1899.072  | 32   | 533.888  | 126.998   | 33   | 536.955  | 112.716   | 34   | 539.093  | 114.709   | 35   | 546.999  | 137.240   |
| 36   | 557.940  | 142.190   | 37   | 564.039  | 1752.860  | 38   | 585.926  | 112.389   | 39   | 655.855  | 122.201   | 40   | 659.048  | 317.060   |
| 41   | 662.001  | 164.049   | 42   | 669.048  | 204.796   | 43   | 671.007  | 125.547   | 44   | 687.073  | 1363.997  | 45   | 693.190  | 388.876   |
| 46   | 772.187  | 143.873   | 47   | 800.231  | 974.532   | 48   | 804.283  | 132.797   | 49   | 821.349  | 314.828   | 50   | 876.977  | 156.875   |
| 51   | 899.022  | 149.722   | 52   | 913.380  | 370.794   | 53   | 958.533  | 1900.914  | 54   | 1016.145 | 236.890   | 55   | 1027.591 | 280.923   |
| 56   | 1045.768 | 328.029   | 57   | 1068.675 | 359.235   | 58   | 1087.747 | 20958.009 |      |          |           |      |          |           |

### Calculated Masses:

EHQEYLLR

| N-Term. | Ion | a              | a-17     | a-18     | b              | b-17     | b-18           | b+18            | c              | i              | x        | y               | z              | C-Term. | Ion |
|---------|-----|----------------|----------|----------|----------------|----------|----------------|-----------------|----------------|----------------|----------|-----------------|----------------|---------|-----|
| 1       | E   | 102.055        | 85.028   | 84.044   | 130.050        | 113.023  | <b>112.039</b> | 148.060         | 147.076        | 102.055        | 201.098  | <b>175.119</b>  | <b>158.092</b> | 8       | R   |
| 2       | H   | <b>239.114</b> | 222.087  | 221.103  | <b>267.109</b> | 250.082  | <b>249.098</b> | 285.119         | <b>284.135</b> | <b>110.071</b> | 314.182  | <b>288.203</b>  | <b>271.176</b> | 7       | L   |
| 3       | Q   | 367.172        | 350.146  | 349.162  | <b>395.167</b> | 378.141  | <b>377.157</b> | 413.178         | 412.194        | <b>101.071</b> | 427.266  | <b>401.287</b>  | <b>384.261</b> | 6       | L   |
| 4       | E   | <b>496.215</b> | 479.188  | 478.204  | <b>524.210</b> | 507.183  | <b>506.199</b> | 542.221         | 541.236        | 102.055        | 590.330  | <b>564.350</b>  | <b>547.324</b> | 5       | Y   |
| 5       | Y   | <b>659.278</b> | 642.252  | 641.268  | <b>687.273</b> | 670.247  | <b>669.263</b> | 705.284         | 704.300        | <b>136.076</b> | 719.372  | <b>693.393</b>  | 676.366        | 4       | E   |
| 6       | L   | <b>772.362</b> | 755.336  | 754.352  | <b>800.357</b> | 783.331  | 782.347        | 818.368         | 817.384        | <b>86.096</b>  | 847.431  | <b>821.452</b>  | <b>804.425</b> | 3       | Q   |
| 7       | L   | 885.446        | 868.420  | 867.436  | <b>913.441</b> | 896.415  | 895.431        | 931.452         | 930.468        | <b>86.096</b>  | 984.490  | <b>958.510</b>  | 941.484        | 2       | H   |
| 8       | R   | 1041.548       | 1024.521 | 1023.537 | 1069.543       | 1052.516 | 1051.532       | <b>1087.553</b> | 1086.569       | <b>129.113</b> | 1113.532 | <b>1087.553</b> | 1070.527       | 1       | E   |

## SVMP parentmass 1073.517

## Spectrum Analysis Report

|                  |          |                   |          |                     |       |                  |          |
|------------------|----------|-------------------|----------|---------------------|-------|------------------|----------|
| Sequence Name:   |          | Parentmass:       | 1073.517 | Mass Error:         | 0.038 | MH+ (mono):      | 1073.480 |
| MH+ (avg):       | 1074.153 | Threshold (a.i.): | 0.000    | Tolerance (Da):     | 0.700 | Number of Peaks: | 50       |
| Above Threshold: | 50       | Assigned Peaks:   | 25       | Not assigned Peaks: | 25    |                  |          |

Abs. Int. \* 1000

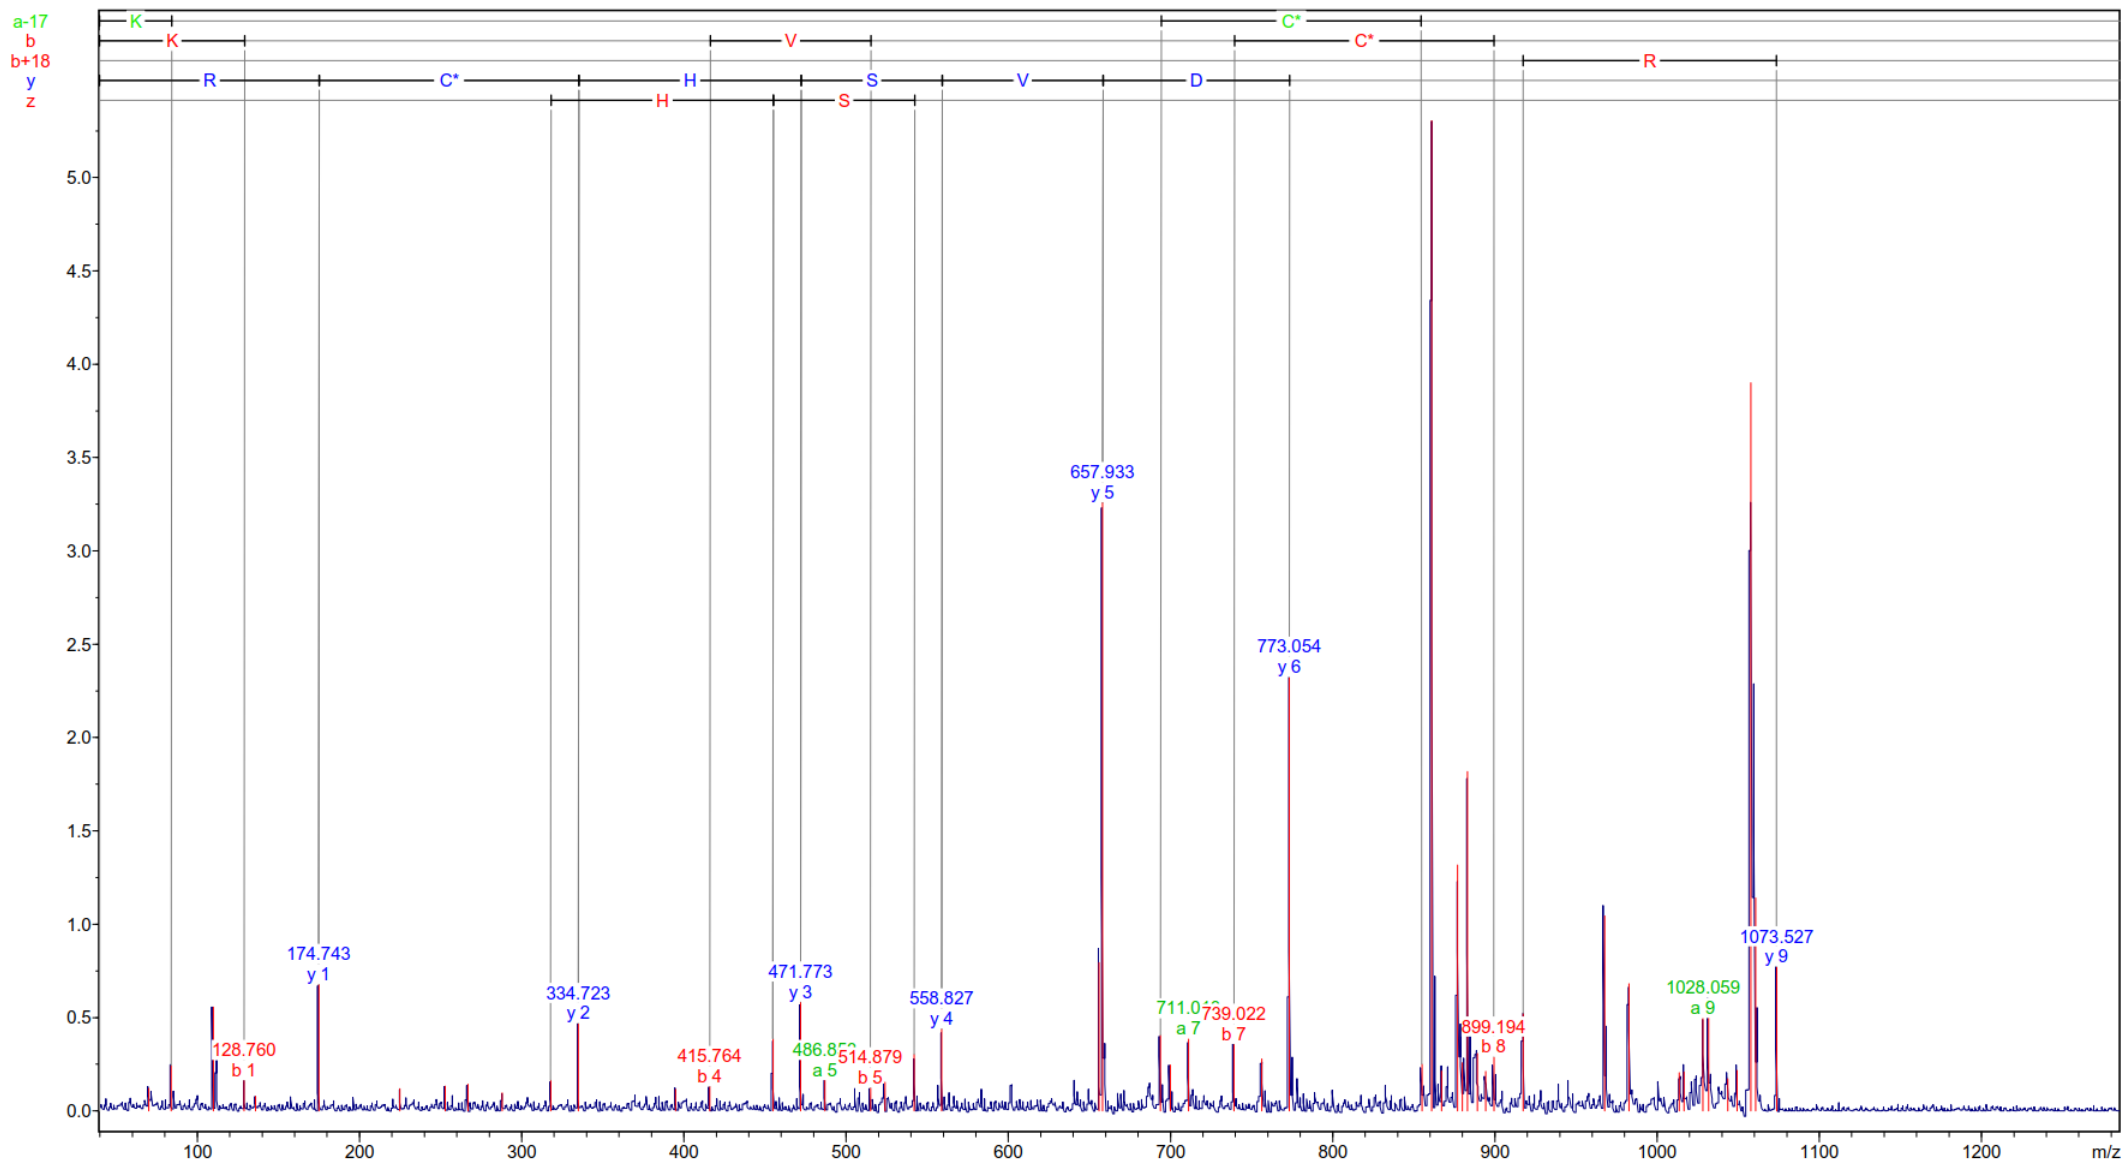

## Spectrum Analysis Report

### Display Parameter:

|                   |          |                     |       |                  |          |                  |          |
|-------------------|----------|---------------------|-------|------------------|----------|------------------|----------|
| Parentmass:       | 1073.517 | Mass Error:         | 0.038 | MH+ (mono):      | 1073.480 | MH+ (avg):       | 1074.153 |
| Threshold (a.i.): | 0.000    | Tolerance (Da):     | 0.700 | Number of Peaks: | 50       | Above Threshold: | 50       |
| Assigned Peaks:   | 25       | Not assigned Peaks: | 25    |                  |          |                  |          |

### Peaklist:

| Peak | Mass     | Intensity |
|------|----------|-----------|------|----------|-----------|------|----------|-----------|------|----------|-----------|------|----------|-----------|
| 1    | 69.814   | 121.045   | 2    | 83.799   | 242.850   | 3    | 109.759  | 555.881   | 4    | 128.760  | 164.610   | 5    | 135.715  | 78.579    |
| 6    | 174.743  | 678.294   | 7    | 224.696  | 119.623   | 8    | 252.763  | 133.607   | 9    | 266.682  | 143.448   | 10   | 287.708  | 96.718    |
| 11   | 317.712  | 163.711   | 12   | 334.723  | 469.356   | 13   | 394.729  | 115.362   | 14   | 415.764  | 131.749   | 15   | 454.757  | 387.573   |
| 16   | 471.773  | 583.592   | 17   | 486.853  | 164.490   | 18   | 514.879  | 123.964   | 19   | 523.801  | 153.087   | 20   | 541.815  | 302.307   |
| 21   | 558.827  | 439.681   | 22   | 655.691  | 794.818   | 23   | 657.933  | 3259.352  | 24   | 693.668  | 405.690   | 25   | 699.635  | 246.556   |
| 26   | 711.013  | 387.023   | 27   | 739.022  | 357.914   | 28   | 756.051  | 277.985   | 29   | 773.054  | 2324.330  | 30   | 854.827  | 249.877   |
| 31   | 860.858  | 5436.275  | 32   | 867.019  | 214.183   | 33   | 876.791  | 1317.913  | 34   | 879.842  | 258.312   | 35   | 882.853  | 1817.114  |
| 36   | 889.120  | 307.633   | 37   | 894.224  | 211.157   | 38   | 899.194  | 289.455   | 39   | 917.238  | 521.792   | 40   | 967.426  | 1044.056  |
| 41   | 982.415  | 681.641   | 42   | 1013.462 | 205.044   | 43   | 1016.504 | 208.298   | 44   | 1028.059 | 496.102   | 45   | 1031.516 | 521.645   |
| 46   | 1043.408 | 172.286   | 47   | 1049.139 | 216.767   | 48   | 1057.539 | 3901.046  | 49   | 1060.566 | 1140.514  | 50   | 1073.527 | 773.333   |

### Calculated Masses:

KGDDVSHCR 8: Carbamidomethyl (C)

| N-Term. | Ion | a               | a-17           | a-18           | b              | b-17           | b-18     | b+18            | c              | i              | x        | y               | z              | C-Term. | Ion |
|---------|-----|-----------------|----------------|----------------|----------------|----------------|----------|-----------------|----------------|----------------|----------|-----------------|----------------|---------|-----|
| 1       | K   | 101.107         | <b>84.081</b>  | 83.097         | <b>129.102</b> | 112.076        | 111.092  | 147.113         | 146.129        | 101.107        | 201.098  | <b>175.119</b>  | 158.092        | 9       | R   |
| 2       | G   | 158.129         | 141.102        | 140.118        | 186.124        | 169.097        | 168.113  | 204.134         | 203.150        | 30.034         | 361.129  | <b>335.150</b>  | <b>318.123</b> | 8       | C*  |
| 3       | D   | 273.156         | 256.129        | 255.145        | 301.151        | 284.124        | 283.140  | 319.161         | <b>318.177</b> | 88.039         | 498.188  | <b>472.209</b>  | <b>455.182</b> | 7       | H   |
| 4       | D   | 388.183         | 371.156        | 370.172        | <b>416.178</b> | 399.151        | 398.167  | 434.188         | 433.204        | 88.039         | 585.220  | <b>559.241</b>  | <b>542.214</b> | 6       | S   |
| 5       | V   | <b>487.251</b>  | 470.225        | 469.241        | <b>515.246</b> | 498.219        | 497.235  | 533.257         | 532.273        | 72.081         | 684.288  | <b>658.309</b>  | 641.282        | 5       | V   |
| 6       | S   | 574.283         | 557.257        | 556.273        | 602.278        | 585.251        | 584.267  | 620.289         | 619.305        | 60.044         | 799.315  | <b>773.336</b>  | <b>756.309</b> | 4       | D   |
| 7       | H   | <b>711.342</b>  | <b>694.315</b> | <b>693.331</b> | <b>739.337</b> | 722.310        | 721.326  | 757.348         | <b>756.363</b> | <b>110.071</b> | 914.342  | 888.363         | 871.336        | 3       | D   |
| 8       | C*  | 871.373         | <b>854.346</b> | 853.362        | <b>899.368</b> | <b>882.341</b> | 881.357  | <b>917.378</b>  | 916.394        | 133.043        | 971.364  | 945.384         | 928.358        | 2       | G   |
| 9       | R   | <b>1027.474</b> | 1010.447       | 1009.463       | 1055.469       | 1038.442       | 1037.458 | <b>1073.479</b> | 1072.495       | <b>129.113</b> | 1099.459 | <b>1073.479</b> | 1056.453       | 1       | K   |

SVMP parentmass 1497.840

Spectrum Analysis Report

|                  |                   |          |                     |       |                  |          |
|------------------|-------------------|----------|---------------------|-------|------------------|----------|
| Sequence Name:   | Parentmass:       | 1497.840 | Mass Error:         | 0.044 | MH+ (mono):      | 1497.796 |
| MH+ (avg):       | Threshold (a.i.): | 0.000    | Tolerance (Da):     | 0.800 | Number of Peaks: | 45       |
| Above Threshold: | Assigned Peaks:   | 28       | Not assigned Peaks: | 17    |                  |          |

Abs. Int. \* 1000

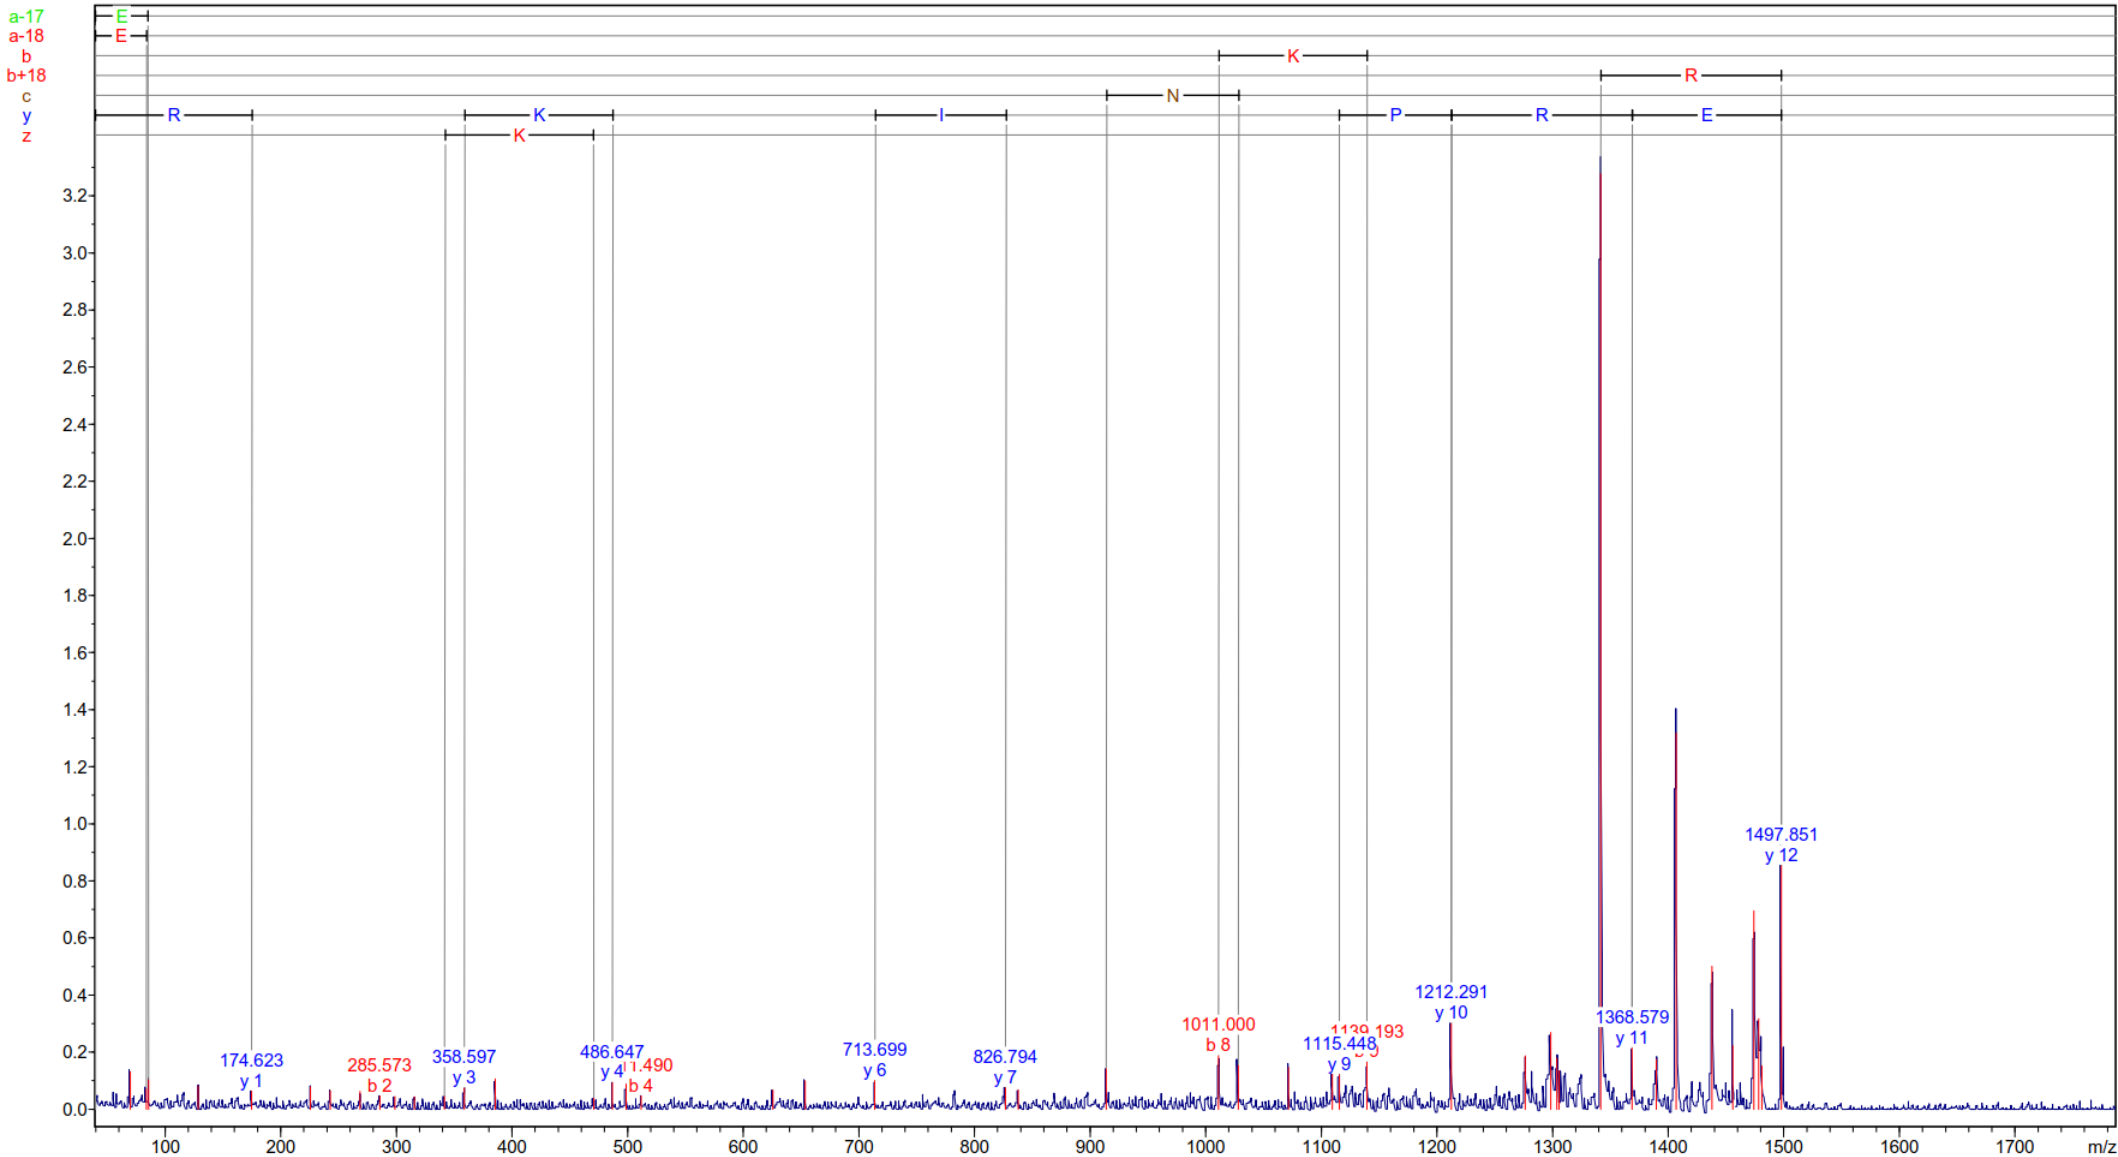

## Spectrum Analysis Report

### Display Parameter:

|                   |          |                     |       |                  |          |                  |          |
|-------------------|----------|---------------------|-------|------------------|----------|------------------|----------|
| Parentmass:       | 1497.840 | Mass Error:         | 0.044 | MH+ (mono):      | 1497.796 | MH+ (avg):       | 1498.734 |
| Threshold (a.i.): | 0.000    | Tolerance (Da):     | 0.800 | Number of Peaks: | 45       | Above Threshold: | 45       |
| Assigned Peaks:   | 28       | Not assigned Peaks: | 17    |                  |          |                  |          |

### Peaklist:

| Peak | Mass     | Intensity |
|------|----------|-----------|------|----------|-----------|------|----------|-----------|------|----------|-----------|------|----------|-----------|
| 1    | 69.759   | 132.699   | 2    | 83.705   | 71.879    | 3    | 85.726   | 104.658   | 4    | 128.615  | 81.912    | 5    | 174.623  | 64.524    |
| 6    | 225.583  | 79.064    | 7    | 242.612  | 66.117    | 8    | 268.572  | 63.207    | 9    | 285.573  | 47.808    | 10   | 298.647  | 45.005    |
| 11   | 315.576  | 44.327    | 12   | 341.569  | 46.524    | 13   | 358.597  | 76.553    | 14   | 385.510  | 106.737   | 15   | 470.618  | 40.755    |
| 16   | 486.647  | 94.975    | 17   | 498.588  | 88.745    | 18   | 511.490  | 48.118    | 19   | 625.565  | 67.516    | 20   | 653.601  | 100.745   |
| 21   | 713.699  | 101.883   | 22   | 826.794  | 77.339    | 23   | 837.823  | 68.661    | 24   | 913.920  | 143.086   | 25   | 1011.000 | 189.215   |
| 26   | 1028.036 | 155.697   | 27   | 1071.469 | 147.537   | 28   | 1109.505 | 134.892   | 29   | 1115.448 | 123.204   | 30   | 1139.193 | 166.731   |
| 31   | 1212.291 | 302.836   | 32   | 1276.268 | 187.955   | 33   | 1298.277 | 269.596   | 34   | 1303.532 | 179.651   | 35   | 1305.605 | 135.952   |
| 36   | 1341.482 | 3279.643  | 37   | 1368.579 | 215.985   | 38   | 1389.705 | 175.936   | 39   | 1406.666 | 1319.213  | 40   | 1437.818 | 501.273   |
| 41   | 1455.828 | 223.843   | 42   | 1473.963 | 695.550   | 43   | 1478.048 | 317.654   | 44   | 1480.936 | 152.911   | 45   | 1497.851 | 855.800   |

### Calculated Masses:

ERPQCILNKPSR 5: Carbamidomethyl (C)

| N-Term. | Ion | a        | a-17           | a-18           | b               | b-17           | b-18            | b+18            | c               | i              | x              | y               | z               | C-Term. | Ion |
|---------|-----|----------|----------------|----------------|-----------------|----------------|-----------------|-----------------|-----------------|----------------|----------------|-----------------|-----------------|---------|-----|
| 1       | E   | 102.055  | <b>85.028</b>  | <b>84.044</b>  | 130.050         | 113.023        | 112.039         | 148.060         | 147.076         | 102.055        | 201.098        | <b>175.119</b>  | 158.092         | 12      | R   |
| 2       | R   | 258.156  | 241.130        | 240.145        | <b>286.151</b>  | <b>269.124</b> | <b>268.140</b>  | 304.162         | 303.178         | <b>129.113</b> | 288.130        | 262.151         | 245.124         | 11      | S   |
| 3       | P   | 355.209  | 338.182        | 337.198        | 383.204         | 366.177        | 365.193         | 401.214         | 400.230         | <b>70.065</b>  | <b>385.183</b> | <b>359.204</b>  | <b>342.177</b>  | 10      | P   |
| 4       | Q   | 483.267  | 466.241        | 465.257        | <b>511.262</b>  | 494.236        | 493.252         | 529.273         | 528.289         | 101.071        | 513.278        | <b>487.299</b>  | <b>470.272</b>  | 9       | K   |
| 5       | C*  | 643.298  | <b>626.272</b> | <b>625.287</b> | 671.293         | <b>654.266</b> | <b>653.282</b>  | 689.304         | 688.320         | 133.043        | 627.321        | 601.342         | 584.315         | 8       | N   |
| 6       | I   | 756.382  | 739.356        | 738.372        | 784.377         | 767.350        | 766.366         | 802.388         | 801.404         | <b>86.096</b>  | 740.405        | <b>714.426</b>  | 697.399         | 7       | L   |
| 7       | L   | 869.466  | 852.440        | 851.456        | 897.461         | 880.435        | 879.451         | 915.472         | <b>914.488</b>  | <b>86.096</b>  | 853.489        | <b>827.510</b>  | 810.483         | 6       | I   |
| 8       | N   | 983.509  | 966.483        | 965.499        | <b>1011.504</b> | 994.477        | 993.493         | 1029.515        | <b>1028.531</b> | 87.055         | 1013.520       | 987.540         | 970.514         | 5       | C*  |
| 9       | K   | 1111.604 | 1094.578       | 1093.594       | <b>1139.599</b> | 1122.572       | 1121.588        | 1157.610        | 1156.626        | 101.107        | 1141.578       | <b>1115.599</b> | 1098.572        | 4       | Q   |
| 10      | P   | 1208.657 | 1191.630       | 1190.646       | 1236.652        | 1219.625       | 1218.641        | 1254.662        | 1253.678        | <b>70.065</b>  | 1238.631       | <b>1212.652</b> | 1195.625        | 3       | P   |
| 11      | S   | 1295.689 | 1278.662       | 1277.678       | 1323.684        | 1306.657       | <b>1305.673</b> | <b>1341.694</b> | <b>1340.710</b> | 60.044         | 1394.732       | <b>1368.753</b> | 1351.726        | 2       | R   |
| 12      | R   | 1451.790 | 1434.763       | 1433.779       | 1479.785        | 1462.758       | 1461.774        | <b>1497.795</b> | 1496.811        | <b>129.113</b> | 1523.775       | <b>1497.795</b> | <b>1480.769</b> | 1       | E   |

## SVMP parentmass 1140.664

## Spectrum Analysis Report

|                  |          |                   |          |                     |       |                  |          |
|------------------|----------|-------------------|----------|---------------------|-------|------------------|----------|
| Sequence Name:   |          | Parentmass:       | 1140.664 | Mass Error:         | 0.153 | MH+ (mono):      | 1140.511 |
| MH+ (avg):       | 1141.239 | Threshold (a.i.): | 0.000    | Tolerance (Da):     | 0.700 | Number of Peaks: | 29       |
| Above Threshold: | 29       | Assigned Peaks:   | 12       | Not assigned Peaks: | 17    |                  |          |

Abs. Int. \* 1000

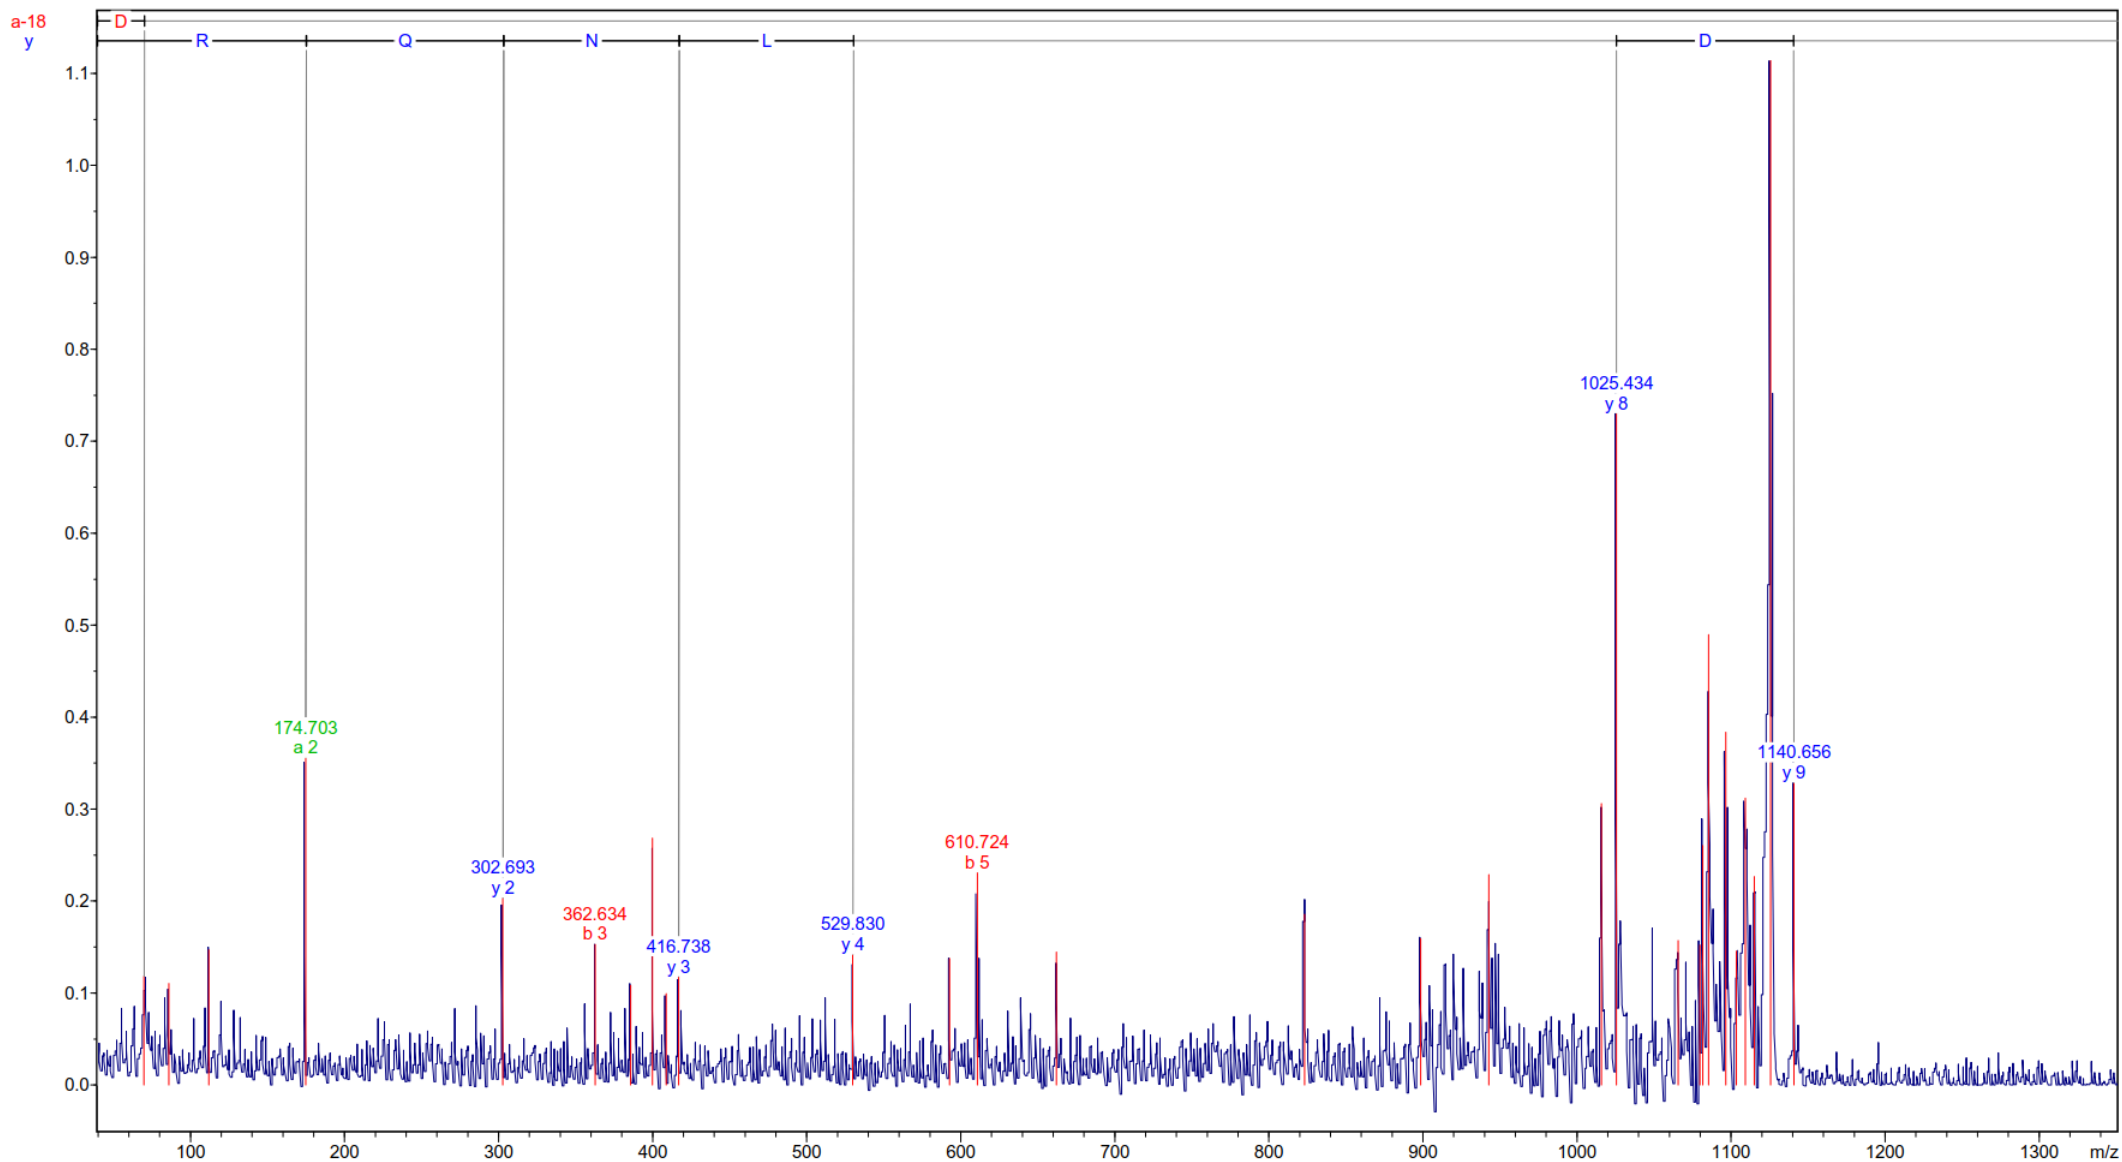

## Spectrum Analysis Report

### Display Parameter:

|                   |          |                     |       |                  |          |                  |          |
|-------------------|----------|---------------------|-------|------------------|----------|------------------|----------|
| Parentmass:       | 1140.664 | Mass Error:         | 0.153 | MH+ (mono):      | 1140.511 | MH+ (avg):       | 1141.239 |
| Threshold (a.i.): | 0.000    | Tolerance (Da):     | 0.700 | Number of Peaks: | 29       | Above Threshold: | 29       |
| Assigned Peaks:   | 12       | Not assigned Peaks: | 17    |                  |          |                  |          |

### Peaklist:

| Peak | Mass     | Intensity |
|------|----------|-----------|------|----------|-----------|------|----------|-----------|------|----------|-----------|------|----------|-----------|
| 1    | 69.758   | 117.978   | 2    | 85.781   | 110.530   | 3    | 111.750  | 147.034   | 4    | 174.703  | 355.887   | 5    | 302.693  | 203.423   |
| 6    | 362.634  | 153.346   | 7    | 385.639  | 108.247   | 8    | 399.698  | 268.322   | 9    | 408.629  | 99.313    | 10   | 416.738  | 117.905   |
| 11   | 529.830  | 141.868   | 12   | 592.737  | 137.614   | 13   | 610.724  | 231.035   | 14   | 662.016  | 144.661   | 15   | 823.040  | 185.780   |
| 16   | 898.456  | 159.304   | 17   | 942.754  | 228.908   | 18   | 1015.682 | 305.940   | 19   | 1025.434 | 730.288   | 20   | 1065.512 | 157.151   |
| 21   | 1079.659 | 152.066   | 22   | 1081.547 | 260.478   | 23   | 1085.386 | 489.842   | 24   | 1096.572 | 383.720   | 25   | 1103.399 | 145.616   |
| 26   | 1109.245 | 312.077   | 27   | 1115.082 | 226.823   | 28   | 1125.598 | 1154.170  | 29   | 1140.656 | 328.887   |      |          |           |

### Calculated Masses:

DSCFTLNQR 3: Carbamidomethyl (C)

| N-Term. | Ion | a              | a-17     | a-18          | b              | b-17     | b-18           | b+18            | c        | i             | x        | y               | z              | C-Term. | Ion |
|---------|-----|----------------|----------|---------------|----------------|----------|----------------|-----------------|----------|---------------|----------|-----------------|----------------|---------|-----|
| 1       | D   | 88.039         | 71.013   | <b>70.029</b> | 116.034        | 99.008   | 98.024         | 134.045         | 133.061  | 88.039        | 201.098  | <b>175.119</b>  | 158.092        | 9       | R   |
| 2       | S   | <b>175.071</b> | 158.045  | 157.061       | 203.066        | 186.040  | 185.056        | 221.077         | 220.093  | 60.044        | 329.157  | <b>303.178</b>  | 286.151        | 8       | Q   |
| 3       | C*  | 335.102        | 318.075  | 317.091       | <b>363.097</b> | 346.070  | 345.086        | 381.107         | 380.123  | 133.043       | 443.200  | <b>417.220</b>  | <b>400.194</b> | 7       | N   |
| 4       | F   | 482.170        | 465.144  | 464.160       | 510.165        | 493.139  | 492.155        | 528.176         | 527.192  | 120.081       | 556.284  | <b>530.305</b>  | 513.278        | 6       | L   |
| 5       | T   | 583.218        | 566.192  | 565.208       | <b>611.213</b> | 594.186  | <b>593.202</b> | 629.224         | 628.240  | 74.060        | 657.331  | 631.352         | 614.326        | 5       | T   |
| 6       | L   | 696.302        | 679.276  | 678.292       | 724.297        | 707.271  | 706.286        | 742.308         | 741.324  | <b>86.096</b> | 804.400  | 778.421         | 761.394        | 4       | F   |
| 7       | N   | 810.345        | 793.319  | 792.334       | 838.340        | 821.313  | 820.329        | 856.351         | 855.367  | 87.055        | 964.431  | 938.451         | 921.425        | 3       | C*  |
| 8       | Q   | 938.404        | 921.377  | 920.393       | 966.399        | 949.372  | 948.388        | 984.409         | 983.425  | 101.071       | 1051.463 | <b>1025.483</b> | 1008.457       | 2       | S   |
| 9       | R   | 1094.505       | 1077.478 | 1076.494      | 1122.500       | 1105.473 | 1104.489       | <b>1140.510</b> | 1139.526 | 129.113       | 1166.489 | <b>1140.510</b> | 1123.484       | 1       | D   |

SVMP parentmass 1155.607

Spectrum Analysis Report

|                  |          |                   |          |                     |       |                  |          |
|------------------|----------|-------------------|----------|---------------------|-------|------------------|----------|
| Sequence Name:   |          | Parentmass:       | 1155.607 | Mass Error:         | 0.172 | MH+ (mono):      | 1155.435 |
| MH+ (avg):       | 1156.300 | Threshold (a.i.): | 0.000    | Tolerance (Da):     | 0.700 | Number of Peaks: | 41       |
| Above Threshold: | 41       | Assigned Peaks:   | 23       | Not assigned Peaks: | 18    |                  |          |

Abs. Int. \* 1000

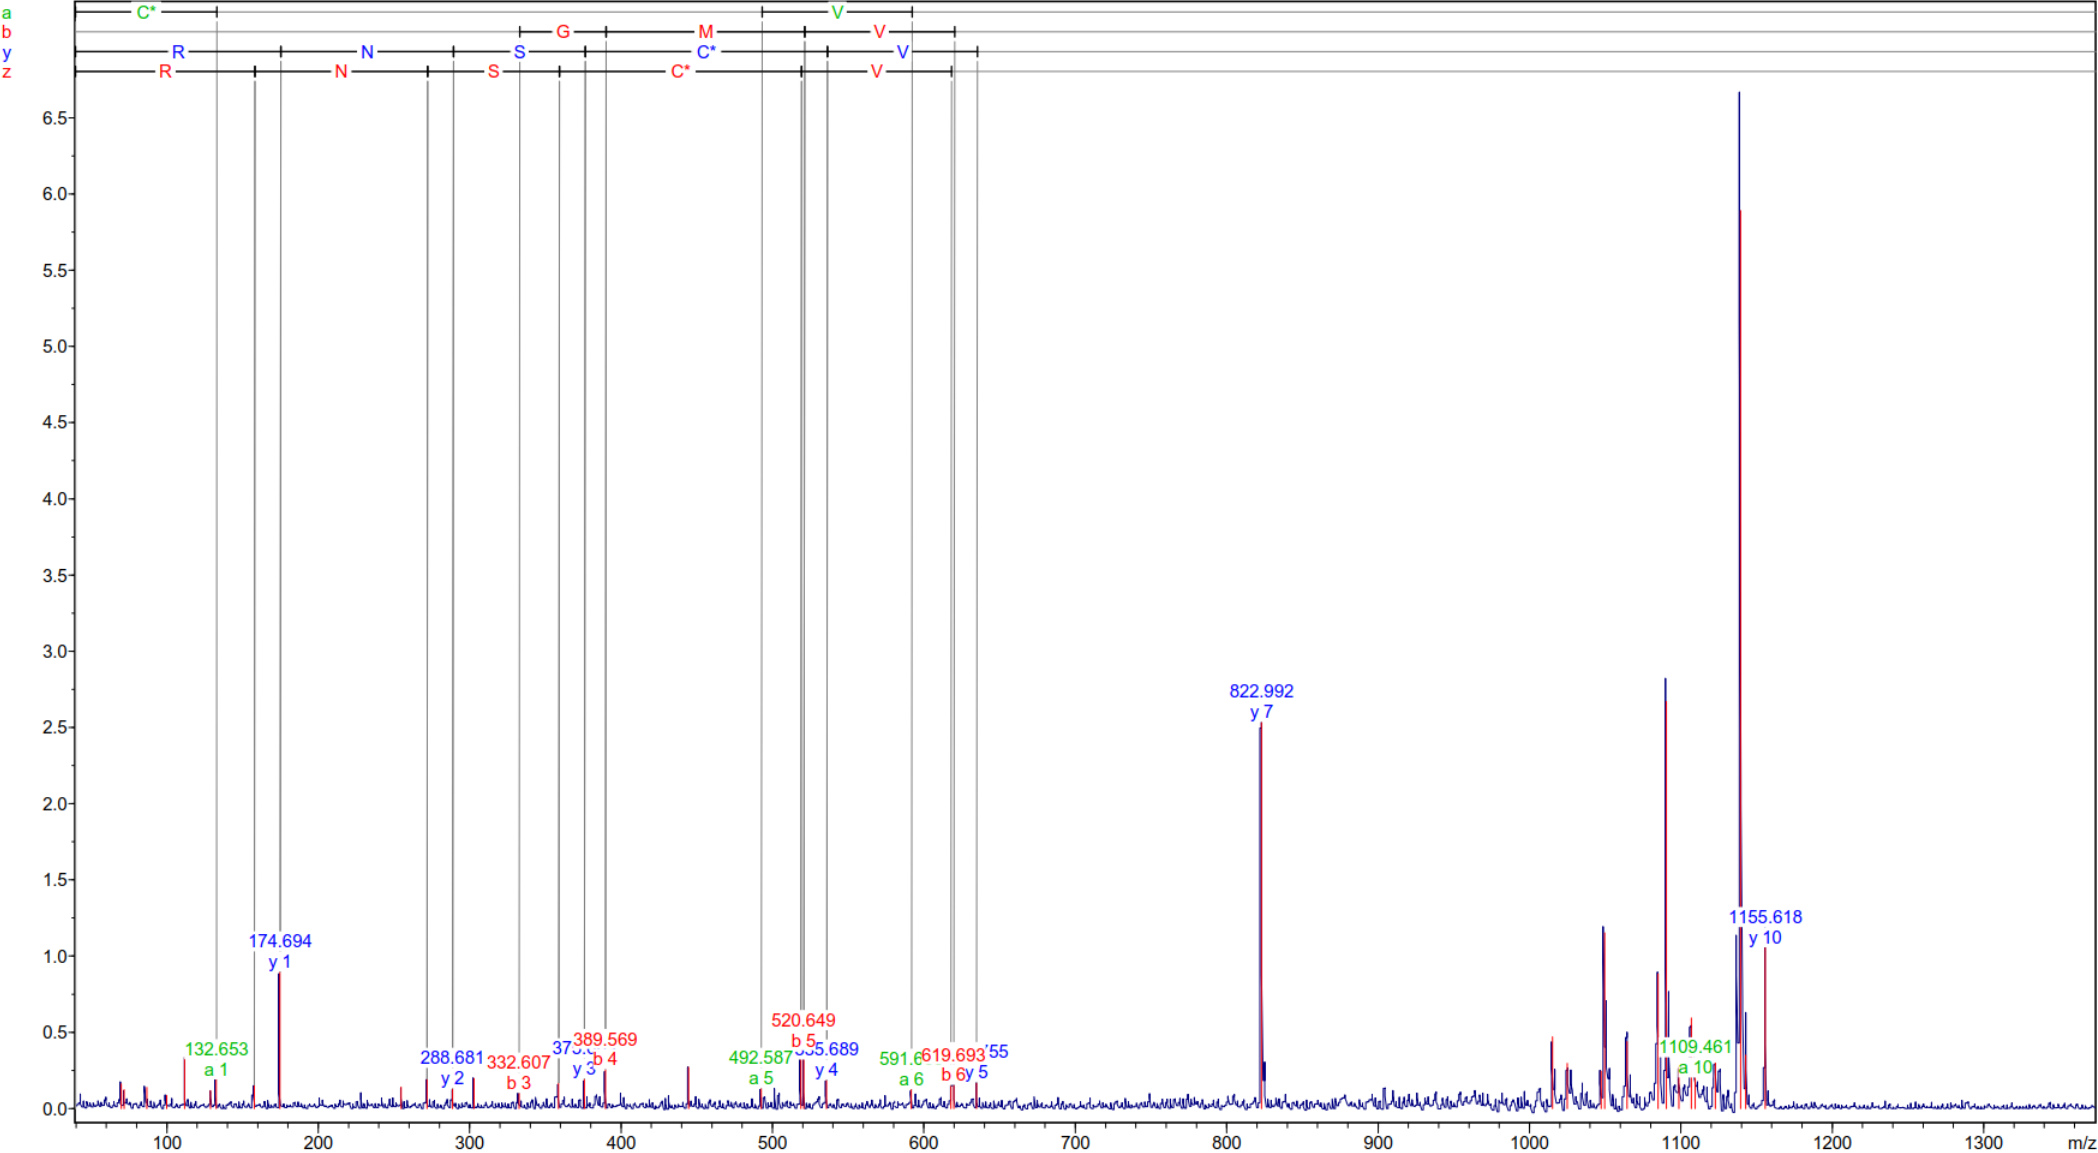

## Spectrum Analysis Report

### Display Parameter:

|                   |          |                     |       |                  |          |                  |          |
|-------------------|----------|---------------------|-------|------------------|----------|------------------|----------|
| Parentmass:       | 1155.607 | Mass Error:         | 0.172 | MH+ (mono):      | 1155.435 | MH+ (avg):       | 1156.300 |
| Threshold (a.i.): | 0.000    | Tolerance (Da):     | 0.700 | Number of Peaks: | 41       | Above Threshold: | 41       |
| Assigned Peaks:   | 23       | Not assigned Peaks: | 18    |                  |          |                  |          |

### Peaklist:

| Peak | Mass     | Intensity |
|------|----------|-----------|------|----------|-----------|------|----------|-----------|------|----------|-----------|------|----------|-----------|
| 1    | 69.747   | 162.366   | 2    | 71.778   | 124.576   | 3    | 86.749   | 139.472   | 4    | 99.752   | 87.669    | 5    | 111.725  | 336.584   |
| 6    | 128.728  | 118.309   | 7    | 132.653  | 189.507   | 8    | 157.669  | 152.840   | 9    | 174.694  | 897.290   | 10   | 254.658  | 141.123   |
| 11   | 271.667  | 194.336   | 12   | 288.681  | 131.913   | 13   | 302.728  | 197.452   | 14   | 332.607  | 101.339   | 15   | 358.672  | 167.820   |
| 16   | 375.663  | 195.817   | 17   | 389.569  | 257.255   | 18   | 444.636  | 272.503   | 19   | 492.587  | 133.767   | 20   | 518.678  | 398.839   |
| 21   | 520.649  | 381.381   | 22   | 535.689  | 188.228   | 23   | 591.685  | 126.075   | 24   | 617.763  | 149.797   | 25   | 619.693  | 153.785   |
| 26   | 634.755  | 169.965   | 27   | 822.992  | 2534.989  | 28   | 1015.041 | 470.810   | 29   | 1024.874 | 297.382   | 30   | 1047.160 | 246.293   |
| 31   | 1049.478 | 1153.824  | 32   | 1064.325 | 440.792   | 33   | 1084.810 | 884.209   | 34   | 1090.339 | 2671.935  | 35   | 1098.558 | 271.506   |
| 36   | 1106.893 | 594.635   | 37   | 1109.461 | 202.238   | 38   | 1122.594 | 300.081   | 39   | 1139.343 | 5891.920  | 40   | 1142.727 | 350.622   |
| 41   | 1155.618 | 1057.358  |      |          |           |      |          |           |      |          |           |      |          |           |

### Calculated Masses:

CGDGMVCSNR 1: Carbamidomethyl (C) 7: Carbamidomethyl (C)

| N-Term. | Ion | a               | a-17           | a-18     | b              | b-17     | b-18     | b+18            | c        | i              | x        | y               | z              | C-Term. | Ion |
|---------|-----|-----------------|----------------|----------|----------------|----------|----------|-----------------|----------|----------------|----------|-----------------|----------------|---------|-----|
| 1       | C*  | <b>133.043</b>  | 116.016        | 115.032  | 161.038        | 144.011  | 143.027  | 179.048         | 178.064  | <b>133.043</b> | 201.098  | <b>175.119</b>  | <b>158.092</b> | 10      | R   |
| 2       | G   | 190.064         | 173.038        | 172.054  | 218.059        | 201.033  | 200.049  | 236.070         | 235.086  | 30.034         | 315.141  | <b>289.162</b>  | <b>272.135</b> | 9       | N   |
| 3       | D   | 305.091         | <b>288.065</b> | 287.081  | <b>333.086</b> | 316.060  | 315.076  | 351.097         | 350.113  | 88.039         | 402.173  | <b>376.194</b>  | <b>359.167</b> | 8       | S   |
| 4       | G   | 362.113         | 345.086        | 344.102  | <b>390.108</b> | 373.081  | 372.097  | 408.118         | 407.134  | 30.034         | 562.204  | <b>536.225</b>  | <b>519.198</b> | 7       | C*  |
| 5       | M   | <b>493.153</b>  | 476.127        | 475.143  | <b>521.148</b> | 504.122  | 503.138  | 539.159         | 538.175  | 104.053        | 661.272  | <b>635.293</b>  | <b>618.266</b> | 6       | V   |
| 6       | V   | <b>592.222</b>  | 575.195        | 574.211  | <b>620.217</b> | 603.190  | 602.206  | 638.227         | 637.243  | <b>72.081</b>  | 792.313  | 766.333         | 749.307        | 5       | M   |
| 7       | C*  | 752.252         | 735.226        | 734.242  | 780.247        | 763.221  | 762.237  | 798.258         | 797.274  | <b>133.043</b> | 849.334  | <b>823.355</b>  | 806.328        | 4       | G   |
| 8       | S   | 839.284         | 822.258        | 821.274  | 867.279        | 850.253  | 849.269  | 885.290         | 884.306  | 60.044         | 964.361  | 938.382         | 921.355        | 3       | D   |
| 9       | N   | 953.327         | 936.301        | 935.317  | 981.322        | 964.296  | 963.312  | 999.333         | 998.349  | <b>87.055</b>  | 1021.383 | 995.403         | 978.377        | 2       | G   |
| 10      | R   | <b>1109.428</b> | 1092.402       | 1091.418 | 1137.423       | 1120.397 | 1119.413 | <b>1155.434</b> | 1154.450 | <b>129.113</b> | 1181.413 | <b>1155.434</b> | 1138.407       | 1       | C*  |

SVMP parentmass 1476.894

Spectrum Analysis Report

|                  |          |                   |          |                     |       |                  |          |
|------------------|----------|-------------------|----------|---------------------|-------|------------------|----------|
| Sequence Name:   |          | Parentmass:       | 1476.894 | Mass Error:         | 0.181 | MH+ (mono):      | 1476.713 |
| MH+ (avg):       | 1477.802 | Threshold (a.i.): | 0.000    | Tolerance (Da):     | 0.700 | Number of Peaks: | 44       |
| Above Threshold: | 44       | Assigned Peaks:   | 26       | Not assigned Peaks: | 18    |                  |          |

Abs. Int. \* 1000

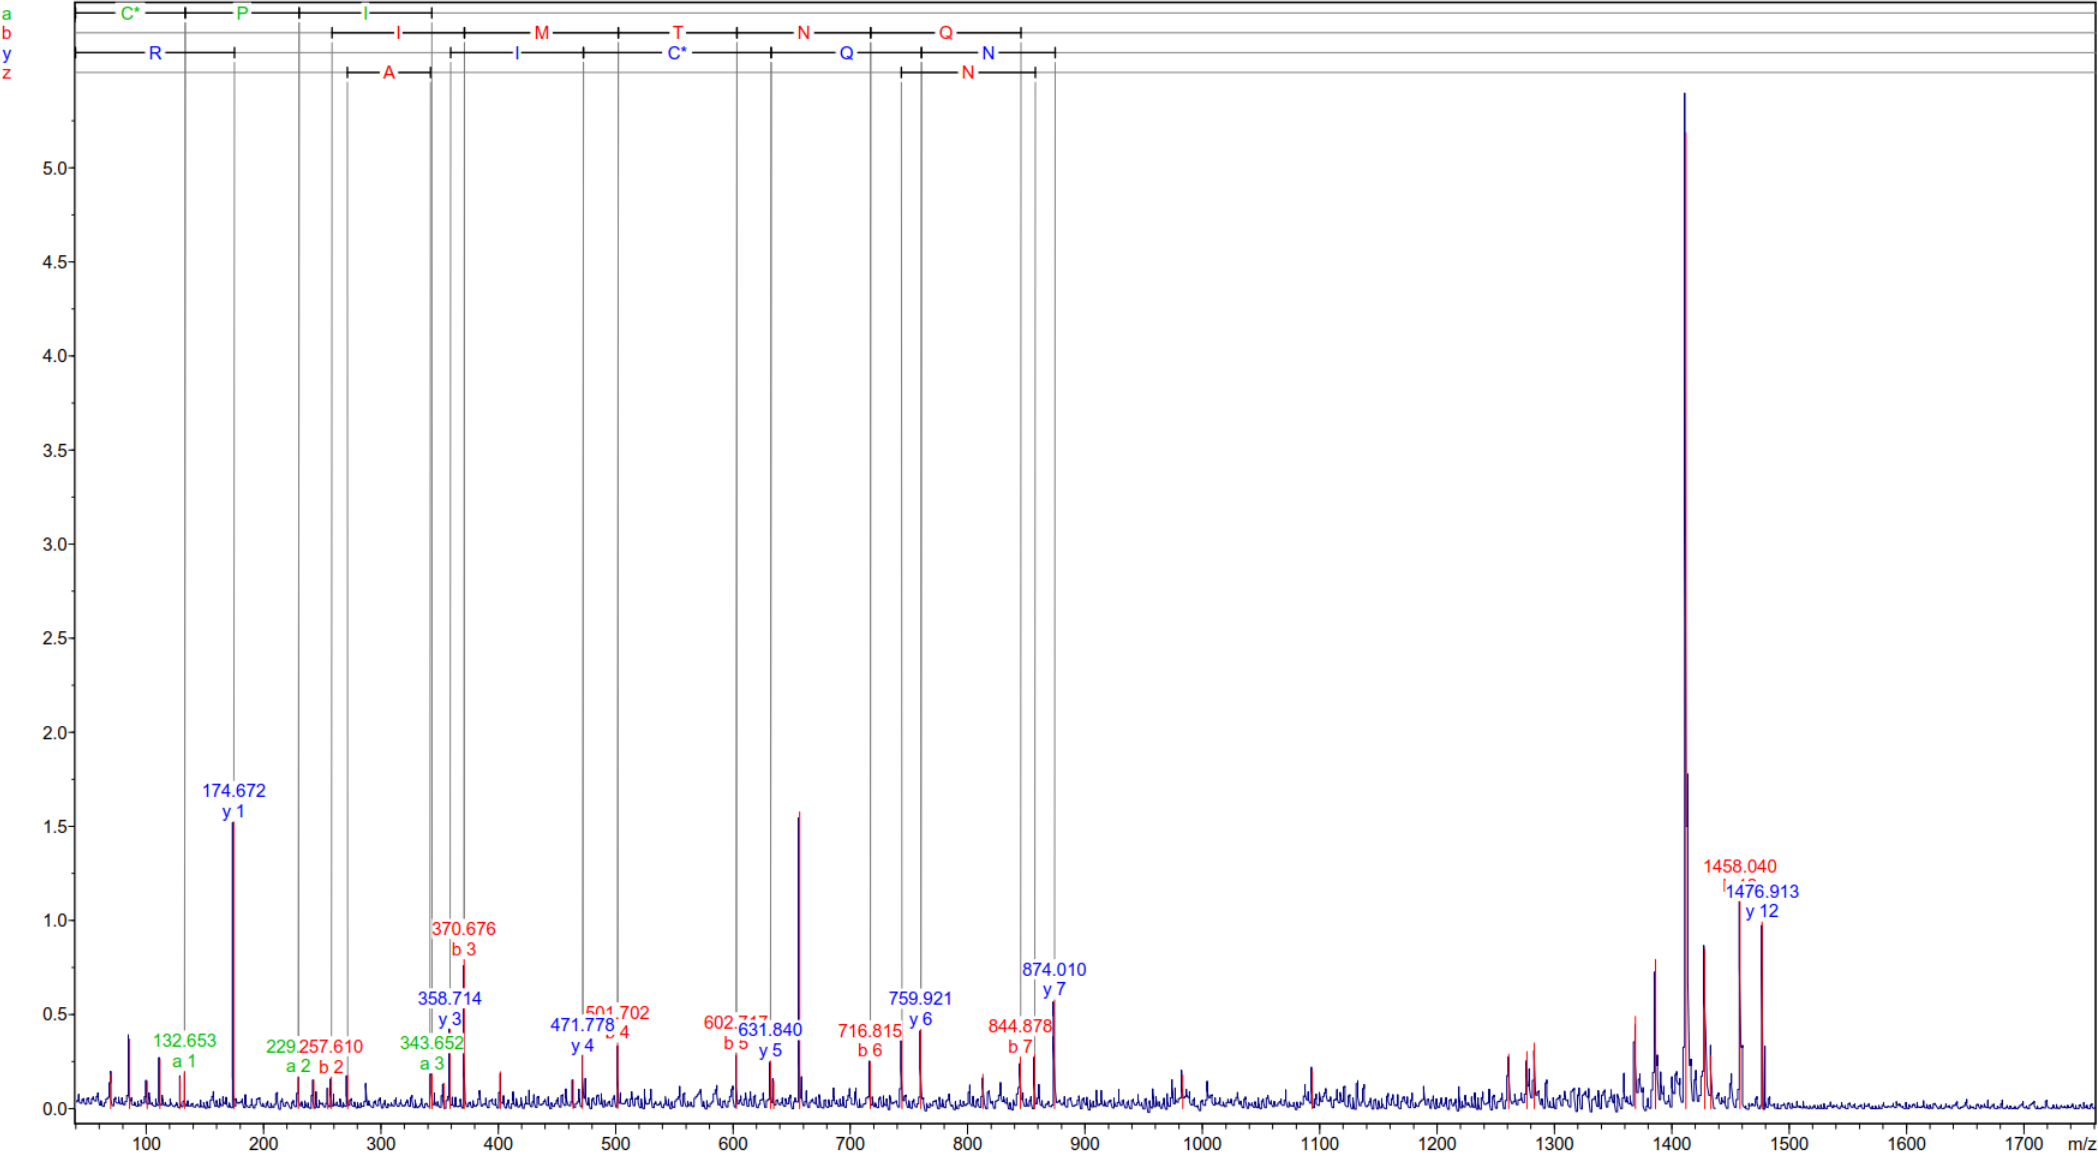

## Spectrum Analysis Report

### Display Parameter:

|                   |          |                     |       |                  |          |                  |          |
|-------------------|----------|---------------------|-------|------------------|----------|------------------|----------|
| Parentmass:       | 1476.894 | Mass Error:         | 0.181 | MH+ (mono):      | 1476.713 | MH+ (avg):       | 1477.802 |
| Threshold (a.i.): | 0.000    | Tolerance (Da):     | 0.700 | Number of Peaks: | 44       | Above Threshold: | 44       |
| Assigned Peaks:   | 26       | Not assigned Peaks: | 18    |                  |          |                  |          |

### Peaklist:

| Peak | Mass     | Intensity |
|------|----------|-----------|------|----------|-----------|------|----------|-----------|------|----------|-----------|------|----------|-----------|
| 1    | 69.733   | 184.079   | 2    | 85.773   | 369.792   | 3    | 100.721  | 147.088   | 4    | 111.704  | 264.537   | 5    | 128.685  | 164.514   |
| 6    | 132.653  | 199.134   | 7    | 174.672  | 1525.968  | 8    | 229.624  | 171.141   | 9    | 242.638  | 149.876   | 10   | 254.673  | 108.788   |
| 11   | 257.610  | 168.820   | 12   | 271.653  | 179.373   | 13   | 341.685  | 188.746   | 14   | 343.652  | 186.244   | 15   | 353.666  | 135.809   |
| 16   | 358.714  | 423.474   | 17   | 370.676  | 793.438   | 18   | 401.699  | 196.218   | 19   | 463.697  | 152.573   | 20   | 471.778  | 284.377   |
| 21   | 501.702  | 348.660   | 22   | 602.717  | 295.970   | 23   | 631.840  | 255.165   | 24   | 634.692  | 147.808   | 25   | 656.768  | 1577.591  |
| 26   | 716.815  | 253.921   | 27   | 743.788  | 391.808   | 28   | 759.921  | 422.155   | 29   | 812.884  | 183.420   | 30   | 844.878  | 275.455   |
| 31   | 856.948  | 292.320   | 32   | 874.010  | 578.606   | 33   | 983.090  | 179.219   | 34   | 1093.654 | 203.557   | 35   | 1260.889 | 290.586   |
| 36   | 1276.579 | 303.794   | 37   | 1282.812 | 348.946   | 38   | 1368.754 | 490.808   | 39   | 1385.916 | 793.902   | 40   | 1411.857 | 5187.663  |
| 41   | 1427.925 | 848.327   | 42   | 1433.086 | 280.959   | 43   | 1458.040 | 1127.796  | 44   | 1476.913 | 994.028   |      |          |           |

### Calculated Masses:

CPIMTNQCIALR 1: Carbamidomethyl (C) 8: Carbamidomethyl (C)

| N-Term. | Ion | a              | a-17     | a-18     | b               | b-17           | b-18           | b+18            | c        | i              | x        | y               | z              | C-Term. | Ion |
|---------|-----|----------------|----------|----------|-----------------|----------------|----------------|-----------------|----------|----------------|----------|-----------------|----------------|---------|-----|
| 1       | C*  | <b>133.043</b> | 116.016  | 115.032  | 161.038         | 144.011        | 143.027        | 179.048         | 178.064  | <b>133.043</b> | 201.098  | <b>175.119</b>  | 158.092        | 12      | R   |
| 2       | P   | <b>230.096</b> | 213.069  | 212.085  | <b>258.091</b>  | 241.064        | 240.080        | 276.101         | 275.117  | <b>70.065</b>  | 314.182  | 288.203         | <b>271.176</b> | 11      | L   |
| 3       | I   | <b>343.180</b> | 326.153  | 325.169  | <b>371.175</b>  | <b>354.148</b> | <b>353.164</b> | 389.185         | 388.201  | <b>86.096</b>  | 385.219  | <b>359.240</b>  | <b>342.214</b> | 10      | A   |
| 4       | M   | 474.220        | 457.194  | 456.210  | <b>502.215</b>  | 485.189        | 484.205        | 520.226         | 519.242  | 104.053        | 498.303  | <b>472.324</b>  | 455.298        | 9       | I   |
| 5       | T   | 575.268        | 558.241  | 557.257  | <b>603.263</b>  | 586.236        | 585.252        | 621.273         | 620.289  | 74.060         | 658.334  | <b>632.355</b>  | 615.328        | 8       | C*  |
| 6       | N   | 689.311        | 672.284  | 671.300  | <b>717.306</b>  | 700.279        | 699.295        | 735.316         | 734.332  | 87.055         | 786.393  | <b>760.413</b>  | <b>743.387</b> | 7       | Q   |
| 7       | Q   | 817.370        | 800.343  | 799.359  | <b>845.364</b>  | 828.338        | 827.354        | 863.375         | 862.391  | <b>101.071</b> | 900.436  | <b>874.456</b>  | <b>857.430</b> | 6       | N   |
| 8       | C*  | 977.400        | 960.374  | 959.390  | 1005.395        | 988.369        | 987.385        | 1023.406        | 1022.422 | <b>133.043</b> | 1001.483 | 975.504         | 958.477        | 5       | T   |
| 9       | I   | 1090.484       | 1073.458 | 1072.474 | 1118.479        | 1101.453       | 1100.469       | 1136.490        | 1135.506 | <b>86.096</b>  | 1132.524 | 1106.545        | 1089.518       | 4       | M   |
| 10      | A   | 1161.521       | 1144.495 | 1143.511 | 1189.516        | 1172.490       | 1171.506       | 1207.527        | 1206.543 | 44.049         | 1245.608 | 1219.629        | 1202.602       | 3       | I   |
| 11      | L   | 1274.605       | 1257.579 | 1256.595 | 1302.600        | 1285.574       | 1284.590       | 1320.611        | 1319.627 | <b>86.096</b>  | 1342.661 | 1316.681        | 1299.655       | 2       | P   |
| 12      | R   | 1430.707       | 1413.680 | 1412.696 | <b>1458.701</b> | 1441.675       | 1440.691       | <b>1476.712</b> | 1475.728 | <b>129.113</b> | 1502.691 | <b>1476.712</b> | 1459.685       | 1       | C*  |

# $^{15}\text{N}$ parentmass 1523.801

## Spectrum Analysis Report

|                        |          |                   |          |                     |        |                         |          |
|------------------------|----------|-------------------|----------|---------------------|--------|-------------------------|----------|
| Sequence Name:         |          | Parentmass:       | 1523.801 | Mass Error:         | -0.017 | MH <sup>+</sup> (mono): | 1523.818 |
| MH <sup>+</sup> (avg): | 1524.701 | Threshold (a.i.): | 0.000    | Tolerance (Da):     | 0.700  | Number of Peaks:        | 36       |
| Above Threshold:       | 36       | Assigned Peaks:   | 17       | Not assigned Peaks: | 19     |                         |          |

Abs. Int. \* 1000

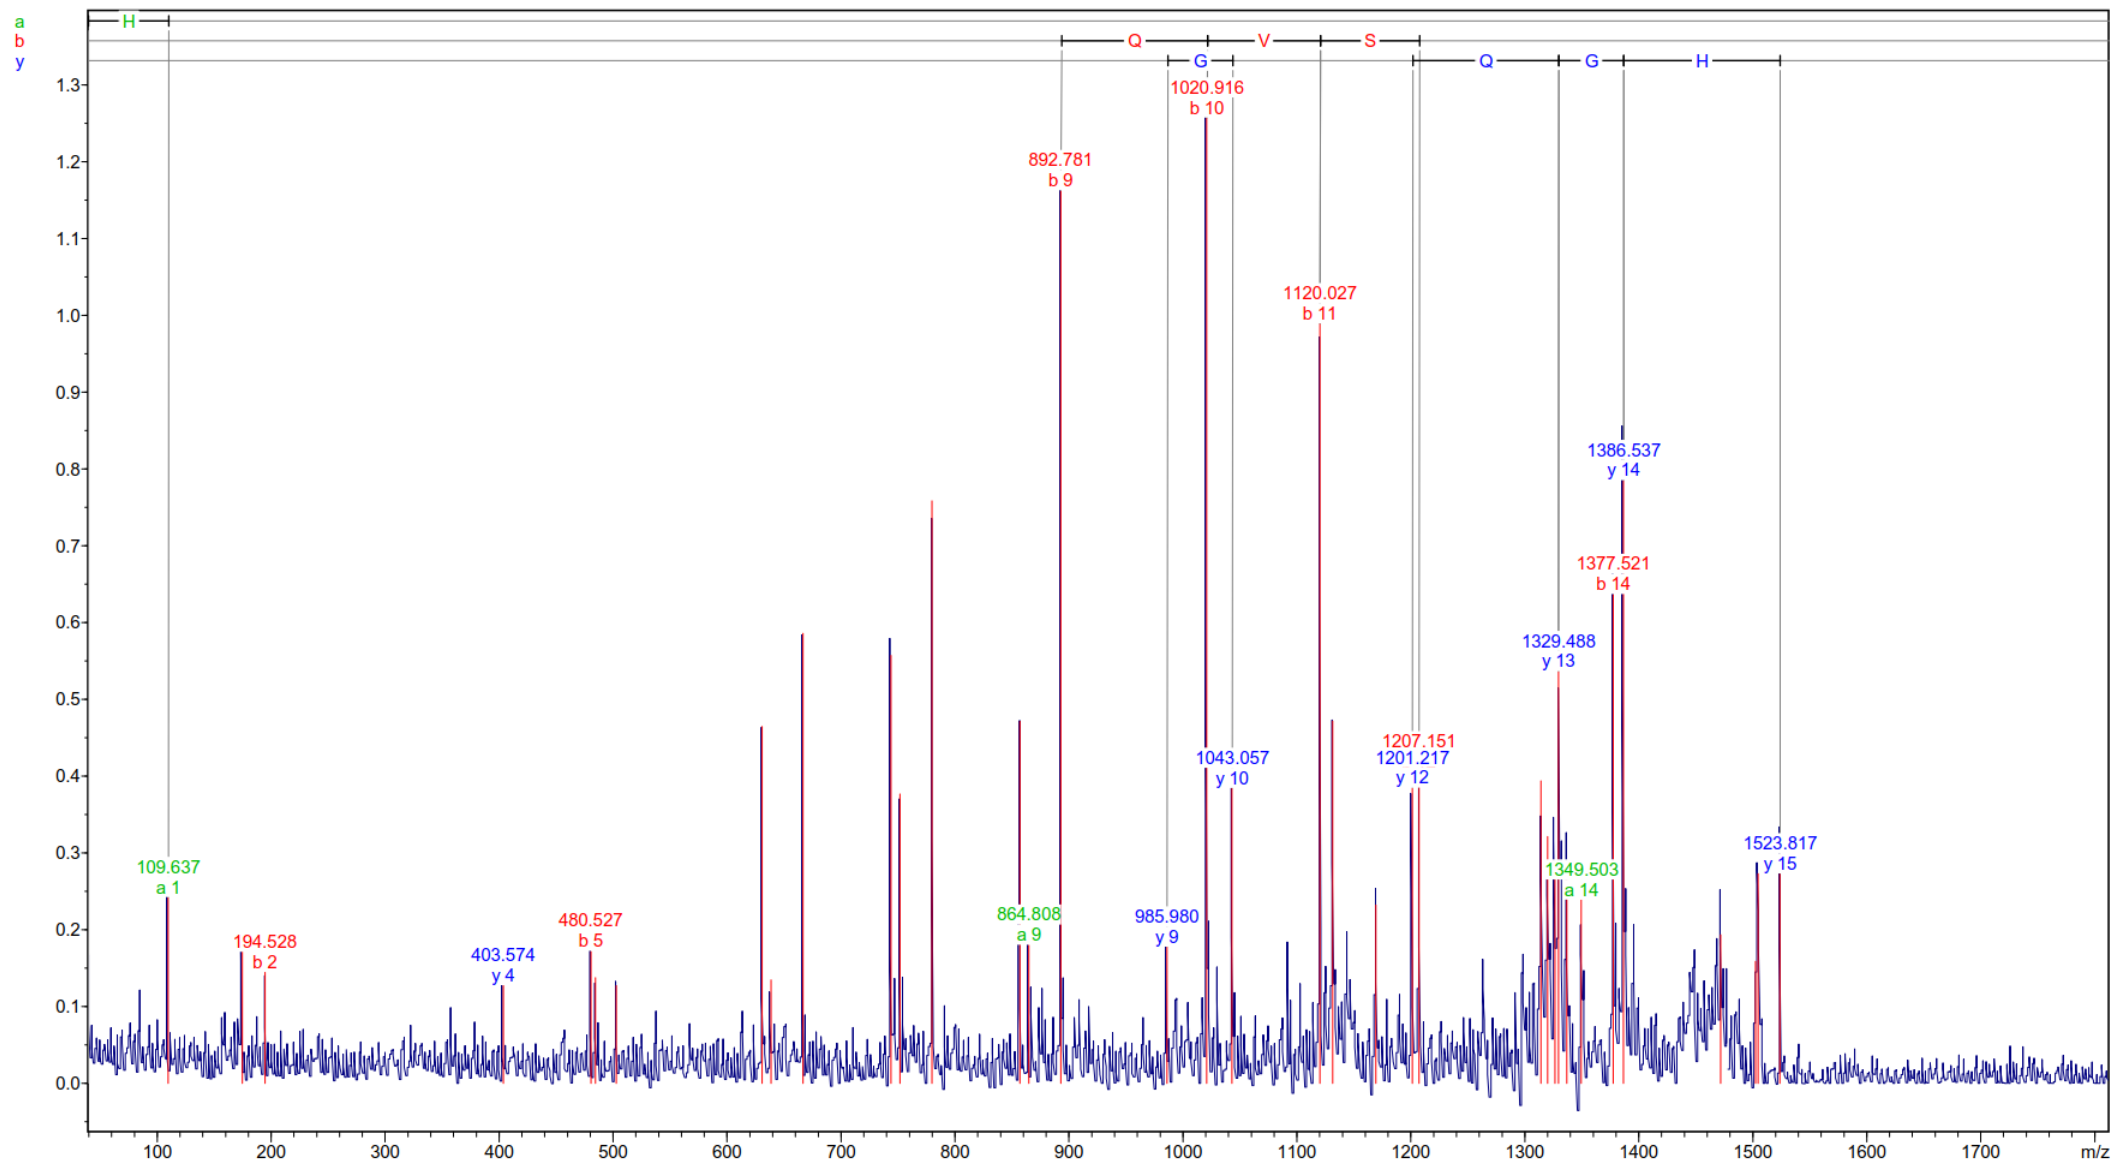

## Spectrum Analysis Report

### Display Parameter:

|                   |          |                     |        |                  |          |                  |          |
|-------------------|----------|---------------------|--------|------------------|----------|------------------|----------|
| Parentmass:       | 1523.801 | Mass Error:         | -0.017 | MH+ (mono):      | 1523.818 | MH+ (avg):       | 1524.701 |
| Threshold (a.i.): | 0.000    | Tolerance (Da):     | 0.700  | Number of Peaks: | 36       | Above Threshold: | 36       |
| Assigned Peaks:   | 17       | Not assigned Peaks: | 19     |                  |          |                  |          |

### Peaklist:

| Peak | Mass     | Intensity |
|------|----------|-----------|------|----------|-----------|------|----------|-----------|------|----------|-----------|------|----------|-----------|
| 1    | 109.637  | 241.928   | 2    | 174.573  | 189.359   | 3    | 194.528  | 144.754   | 4    | 403.574  | 127.319   | 5    | 480.527  | 172.090   |
| 6    | 484.582  | 137.566   | 7    | 502.619  | 127.213   | 8    | 630.656  | 464.985   | 9    | 638.566  | 134.853   | 10   | 666.551  | 585.963   |
| 11   | 743.742  | 557.366   | 12   | 751.664  | 376.896   | 13   | 779.656  | 758.621   | 14   | 856.845  | 471.622   | 15   | 864.808  | 180.033   |
| 16   | 892.781  | 1162.605  | 17   | 985.980  | 177.564   | 18   | 1020.916 | 1257.279  | 19   | 1043.057 | 384.251   | 20   | 1120.027 | 989.351   |
| 21   | 1131.269 | 472.088   | 22   | 1169.208 | 232.371   | 23   | 1201.217 | 384.599   | 24   | 1207.151 | 405.909   | 25   | 1314.168 | 394.158   |
| 26   | 1320.035 | 321.423   | 27   | 1326.359 | 289.490   | 28   | 1329.488 | 536.513   | 29   | 1336.904 | 282.804   | 30   | 1349.503 | 238.875   |
| 31   | 1377.521 | 636.726   | 32   | 1386.537 | 785.079   | 33   | 1471.887 | 193.530   | 34   | 1502.471 | 158.946   | 35   | 1504.751 | 272.981   |
| 36   | 1523.817 | 273.137   |      |          |           |      |          |           |      |          |           |      |          |           |

### Calculated Masses:

HGQGTGELLQVSGIK

| N-Term. | Ion | a               | a-17     | a-18     | b               | b-17     | b-18     | b+18            | c        | i              | x        | y               | z        | C-Term. | Ion |
|---------|-----|-----------------|----------|----------|-----------------|----------|----------|-----------------|----------|----------------|----------|-----------------|----------|---------|-----|
| 1       | H   | <b>110.071</b>  | 93.045   | 92.061   | 138.066         | 121.040  | 120.056  | 156.077         | 155.093  | <b>110.071</b> | 173.092  | 147.113         | 130.086  | 15      | K   |
| 2       | G   | 167.093         | 150.066  | 149.082  | <b>195.088</b>  | 178.061  | 177.077  | 213.098         | 212.114  | 30.034         | 286.176  | 260.197         | 243.170  | 14      | I   |
| 3       | Q   | 295.151         | 278.125  | 277.141  | 323.146         | 306.120  | 305.136  | 341.157         | 340.173  | 101.071        | 343.198  | 317.218         | 300.192  | 13      | G   |
| 4       | G   | 352.173         | 335.146  | 334.162  | 380.168         | 363.141  | 362.157  | 398.178         | 397.194  | 30.034         | 430.230  | <b>404.250</b>  | 387.224  | 12      | S   |
| 5       | T   | 453.220         | 436.194  | 435.210  | <b>481.215</b>  | 464.189  | 463.205  | 499.226         | 498.242  | 74.060         | 529.298  | 503.319         | 486.292  | 11      | V   |
| 6       | G   | 510.242         | 493.215  | 492.231  | 538.237         | 521.210  | 520.226  | 556.247         | 555.263  | 30.034         | 657.357  | 631.377         | 614.351  | 10      | Q   |
| 7       | E   | 639.285         | 622.258  | 621.274  | 667.279         | 650.253  | 649.269  | 685.290         | 684.306  | 102.055        | 770.441  | 744.461         | 727.435  | 9       | L   |
| 8       | L   | 752.369         | 735.342  | 734.358  | 780.363         | 763.337  | 762.353  | 798.374         | 797.390  | 86.096         | 883.525  | 857.545         | 840.519  | 8       | L   |
| 9       | L   | <b>865.453</b>  | 848.426  | 847.442  | <b>893.448</b>  | 876.421  | 875.437  | 911.458         | 910.474  | 86.096         | 1012.567 | <b>986.588</b>  | 969.562  | 7       | E   |
| 10      | Q   | 993.511         | 976.485  | 975.501  | <b>1021.506</b> | 1004.480 | 1003.496 | 1039.517        | 1038.533 | 101.071        | 1069.589 | <b>1043.610</b> | 1026.583 | 6       | G   |
| 11      | V   | 1092.580        | 1075.553 | 1074.569 | <b>1120.575</b> | 1103.548 | 1102.564 | 1138.585        | 1137.601 | 72.081         | 1170.636 | 1144.657        | 1127.631 | 5       | T   |
| 12      | S   | 1179.612        | 1162.585 | 1161.601 | <b>1207.607</b> | 1190.580 | 1189.596 | 1225.617        | 1224.633 | 60.044         | 1227.658 | <b>1201.679</b> | 1184.652 | 4       | G   |
| 13      | G   | 1236.633        | 1219.607 | 1218.623 | 1264.628        | 1247.601 | 1246.617 | 1282.639        | 1281.655 | 30.034         | 1355.717 | <b>1329.737</b> | 1312.711 | 3       | Q   |
| 14      | I   | <b>1349.717</b> | 1332.691 | 1331.707 | <b>1377.712</b> | 1360.686 | 1359.702 | 1395.723        | 1394.739 | 86.096         | 1412.738 | <b>1386.759</b> | 1369.732 | 2       | G   |
| 15      | K   | 1477.812        | 1460.786 | 1459.802 | 1505.807        | 1488.781 | 1487.797 | <b>1523.818</b> | 1522.834 | 101.107        | 1549.797 | <b>1523.818</b> | 1506.791 | 1       | H   |

# <sup>5</sup>N parentmass 1389.797

## Spectrum Analysis Report

|                  |          |                   |          |                     |       |                  |          |
|------------------|----------|-------------------|----------|---------------------|-------|------------------|----------|
| Sequence Name:   |          | Parentmass:       | 1389.797 | Mass Error:         | 0.037 | MH+ (mono):      | 1389.760 |
| MH+ (avg):       | 1390.570 | Threshold (a.i.): | 0.000    | Tolerance (Da):     | 0.700 | Number of Peaks: | 24       |
| Above Threshold: | 24       | Assigned Peaks:   | 19       | Not assigned Peaks: | 5     |                  |          |

Abs. Int. \* 1000

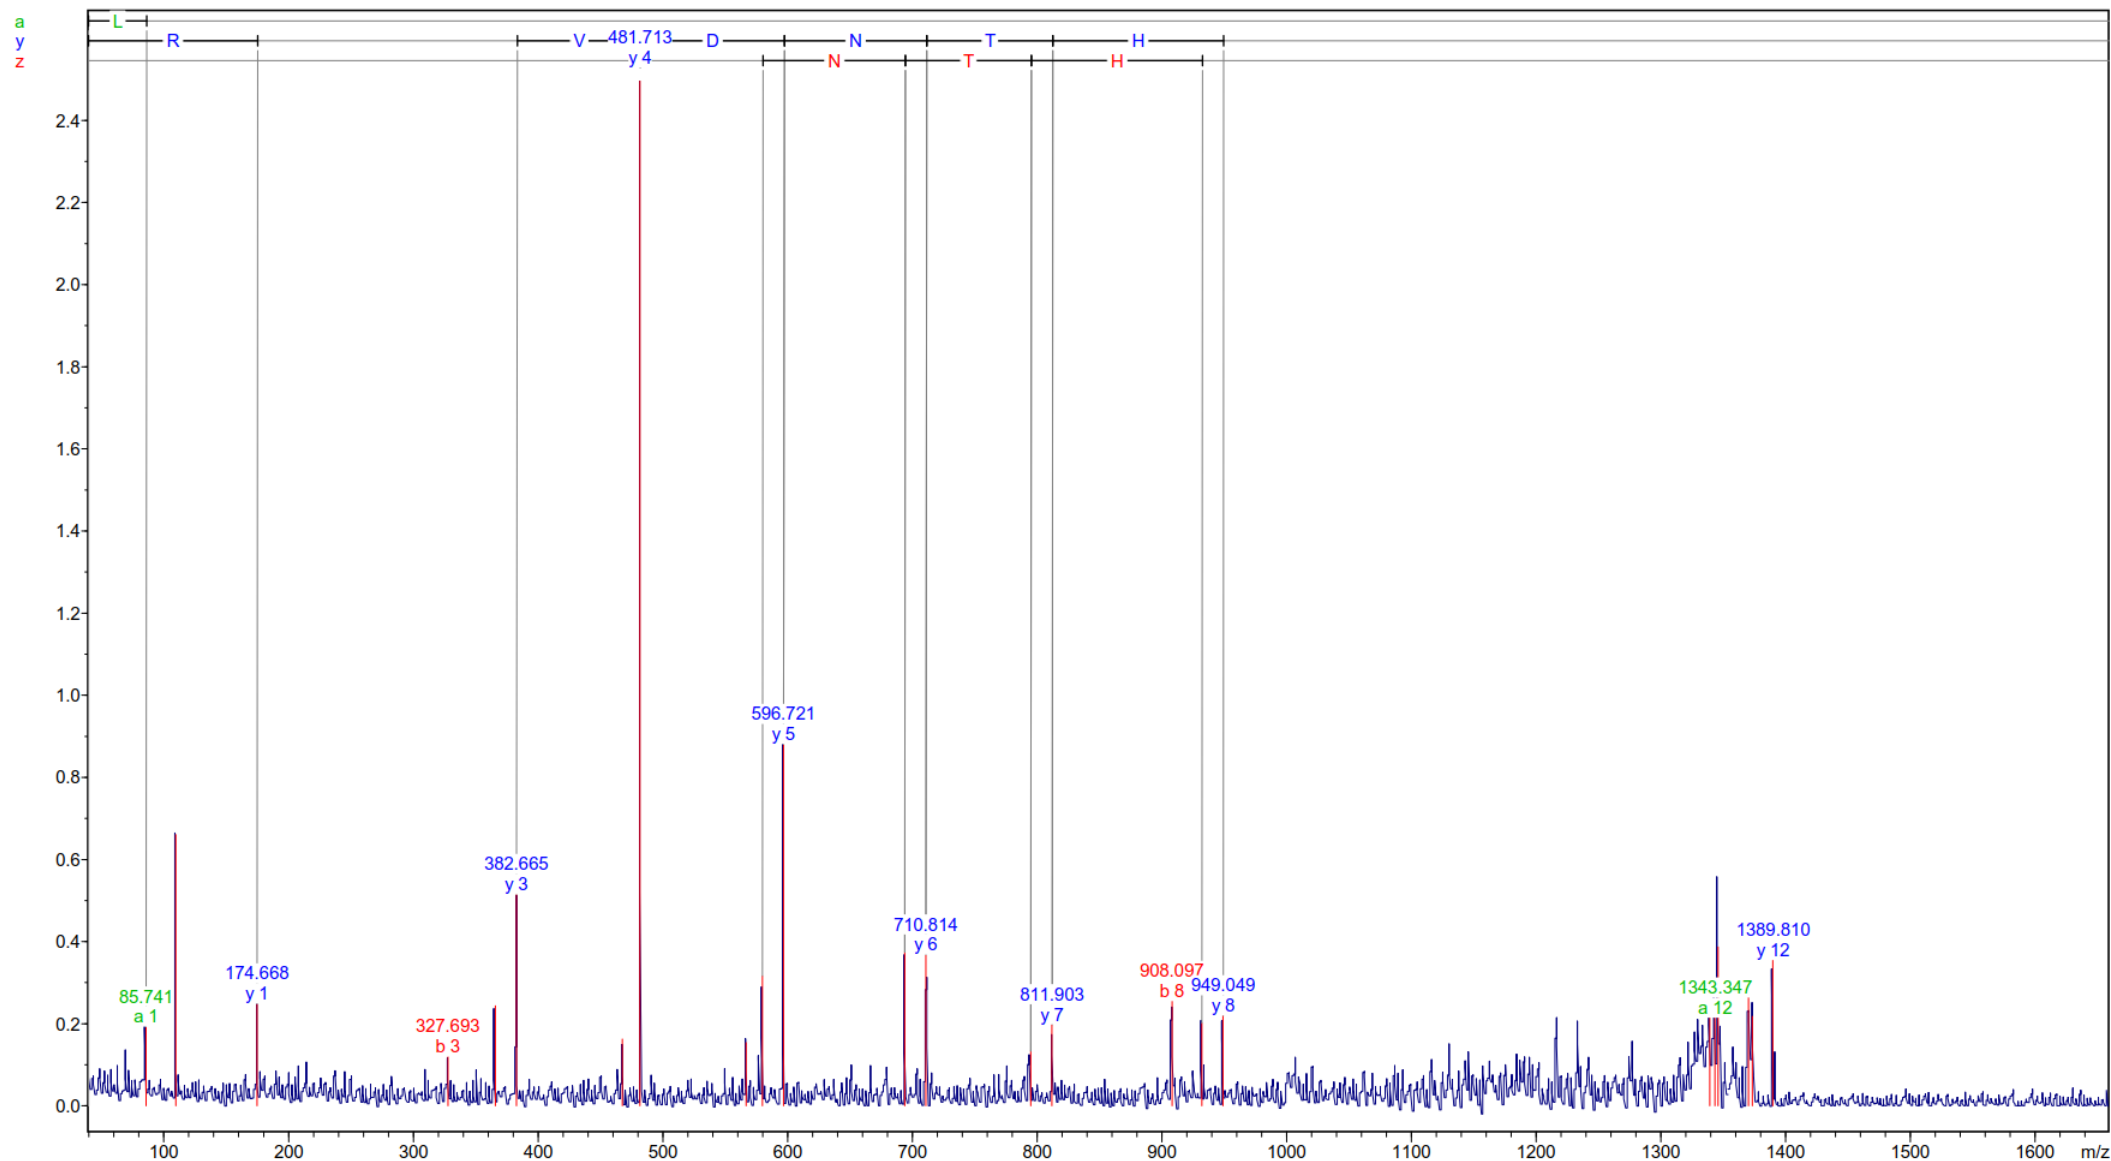

## Spectrum Analysis Report

### Display Parameter:

|                   |          |                     |       |                  |          |                  |          |
|-------------------|----------|---------------------|-------|------------------|----------|------------------|----------|
| Parentmass:       | 1389.797 | Mass Error:         | 0.037 | MH+ (mono):      | 1389.760 | MH+ (avg):       | 1390.570 |
| Threshold (a.i.): | 0.000    | Tolerance (Da):     | 0.700 | Number of Peaks: | 24       | Above Threshold: | 24       |
| Assigned Peaks:   | 19       | Not assigned Peaks: | 5     |                  |          |                  |          |

### Peaklist:

| Peak | Mass     | Intensity |
|------|----------|-----------|------|----------|-----------|------|----------|-----------|------|----------|-----------|------|----------|-----------|
| 1    | 85.741   | 192.805   | 2    | 109.684  | 660.205   | 3    | 174.668  | 248.347   | 4    | 327.693  | 119.700   | 5    | 365.659  | 243.837   |
| 6    | 382.665  | 514.984   | 7    | 467.619  | 162.425   | 8    | 481.713  | 2527.944  | 9    | 566.669  | 153.713   | 10   | 579.744  | 316.232   |
| 11   | 596.721  | 880.908   | 12   | 693.796  | 374.058   | 13   | 710.814  | 367.729   | 14   | 794.870  | 133.438   | 15   | 811.903  | 197.830   |
| 16   | 908.097  | 255.090   | 17   | 932.078  | 201.200   | 18   | 949.049  | 219.975   | 19   | 1339.128 | 224.935   | 20   | 1343.347 | 214.523   |
| 21   | 1345.896 | 386.670   | 22   | 1370.259 | 266.797   | 23   | 1373.258 | 217.702   | 24   | 1389.810 | 354.707   |      |          |           |

### Calculated Masses:

LTILHTNDVHAR

| N-Term. | Ion | a               | a-17     | a-18     | b              | b-17     | b-18     | b+18            | c        | i              | x        | y               | z               | C-Term. | Ion |
|---------|-----|-----------------|----------|----------|----------------|----------|----------|-----------------|----------|----------------|----------|-----------------|-----------------|---------|-----|
| 1       | L   | <b>86.096</b>   | 69.070   | 68.086   | 114.091        | 97.065   | 96.081   | 132.102         | 131.118  | <b>86.096</b>  | 201.098  | <b>175.119</b>  | 158.092         | 12      | R   |
| 2       | T   | 187.144         | 170.118  | 169.134  | 215.139        | 198.112  | 197.128  | 233.150         | 232.166  | 74.060         | 272.135  | 246.156         | 229.130         | 11      | A   |
| 3       | I   | 300.228         | 283.202  | 282.218  | <b>328.223</b> | 311.197  | 310.213  | 346.234         | 345.250  | <b>86.096</b>  | 409.194  | <b>383.215</b>  | <b>366.188</b>  | 10      | H   |
| 4       | L   | 413.312         | 396.286  | 395.302  | 441.307        | 424.281  | 423.297  | 459.318         | 458.334  | <b>86.096</b>  | 508.263  | <b>482.283</b>  | 465.257         | 9       | V   |
| 5       | H   | 550.371         | 533.345  | 532.361  | 578.366        | 561.340  | 560.355  | <b>596.377</b>  | 595.393  | <b>110.071</b> | 623.290  | <b>597.310</b>  | <b>580.284</b>  | 8       | D   |
| 6       | T   | 651.419         | 634.392  | 633.408  | 679.414        | 662.387  | 661.403  | 697.424         | 696.440  | 74.060         | 737.333  | <b>711.353</b>  | <b>694.327</b>  | 7       | N   |
| 7       | N   | 765.462         | 748.435  | 747.451  | 793.457        | 776.430  | 775.446  | <b>811.467</b>  | 810.483  | 87.055         | 838.380  | <b>812.401</b>  | <b>795.374</b>  | 6       | T   |
| 8       | D   | 880.489         | 863.462  | 862.478  | <b>908.484</b> | 891.457  | 890.473  | 926.494         | 925.510  | 88.039         | 975.439  | <b>949.460</b>  | <b>932.433</b>  | 5       | H   |
| 9       | V   | 979.557         | 962.531  | 961.547  | 1007.552       | 990.525  | 989.541  | 1025.563        | 1024.579 | 72.081         | 1088.523 | 1062.544        | 1045.517        | 4       | L   |
| 10      | H   | 1116.616        | 1099.589 | 1098.605 | 1144.611       | 1127.584 | 1126.600 | 1162.621        | 1161.637 | <b>110.071</b> | 1201.607 | 1175.628        | 1158.601        | 3       | I   |
| 11      | A   | 1187.653        | 1170.627 | 1169.643 | 1215.648       | 1198.621 | 1197.637 | 1233.659        | 1232.675 | 44.049         | 1302.655 | 1276.676        | 1259.649        | 2       | T   |
| 12      | R   | <b>1343.754</b> | 1326.728 | 1325.744 | 1371.749       | 1354.723 | 1353.739 | <b>1389.760</b> | 1388.776 | 129.113        | 1415.739 | <b>1389.760</b> | <b>1372.733</b> | 1       | L   |

## 5`N parentmass 1110.568

## Spectrum Analysis Report

|                  |          |                   |          |                     |       |                  |          |
|------------------|----------|-------------------|----------|---------------------|-------|------------------|----------|
| Sequence Name:   |          | Parentmass:       | 1110.568 | Mass Error:         | 0.024 | MH+ (mono):      | 1110.544 |
| MH+ (avg):       | 1111.193 | Threshold (a.i.): | 0.000    | Tolerance (Da):     | 0.700 | Number of Peaks: | 24       |
| Above Threshold: | 24       | Assigned Peaks:   | 13       | Not assigned Peaks: | 11    |                  |          |

Abs. Int. \* 1000

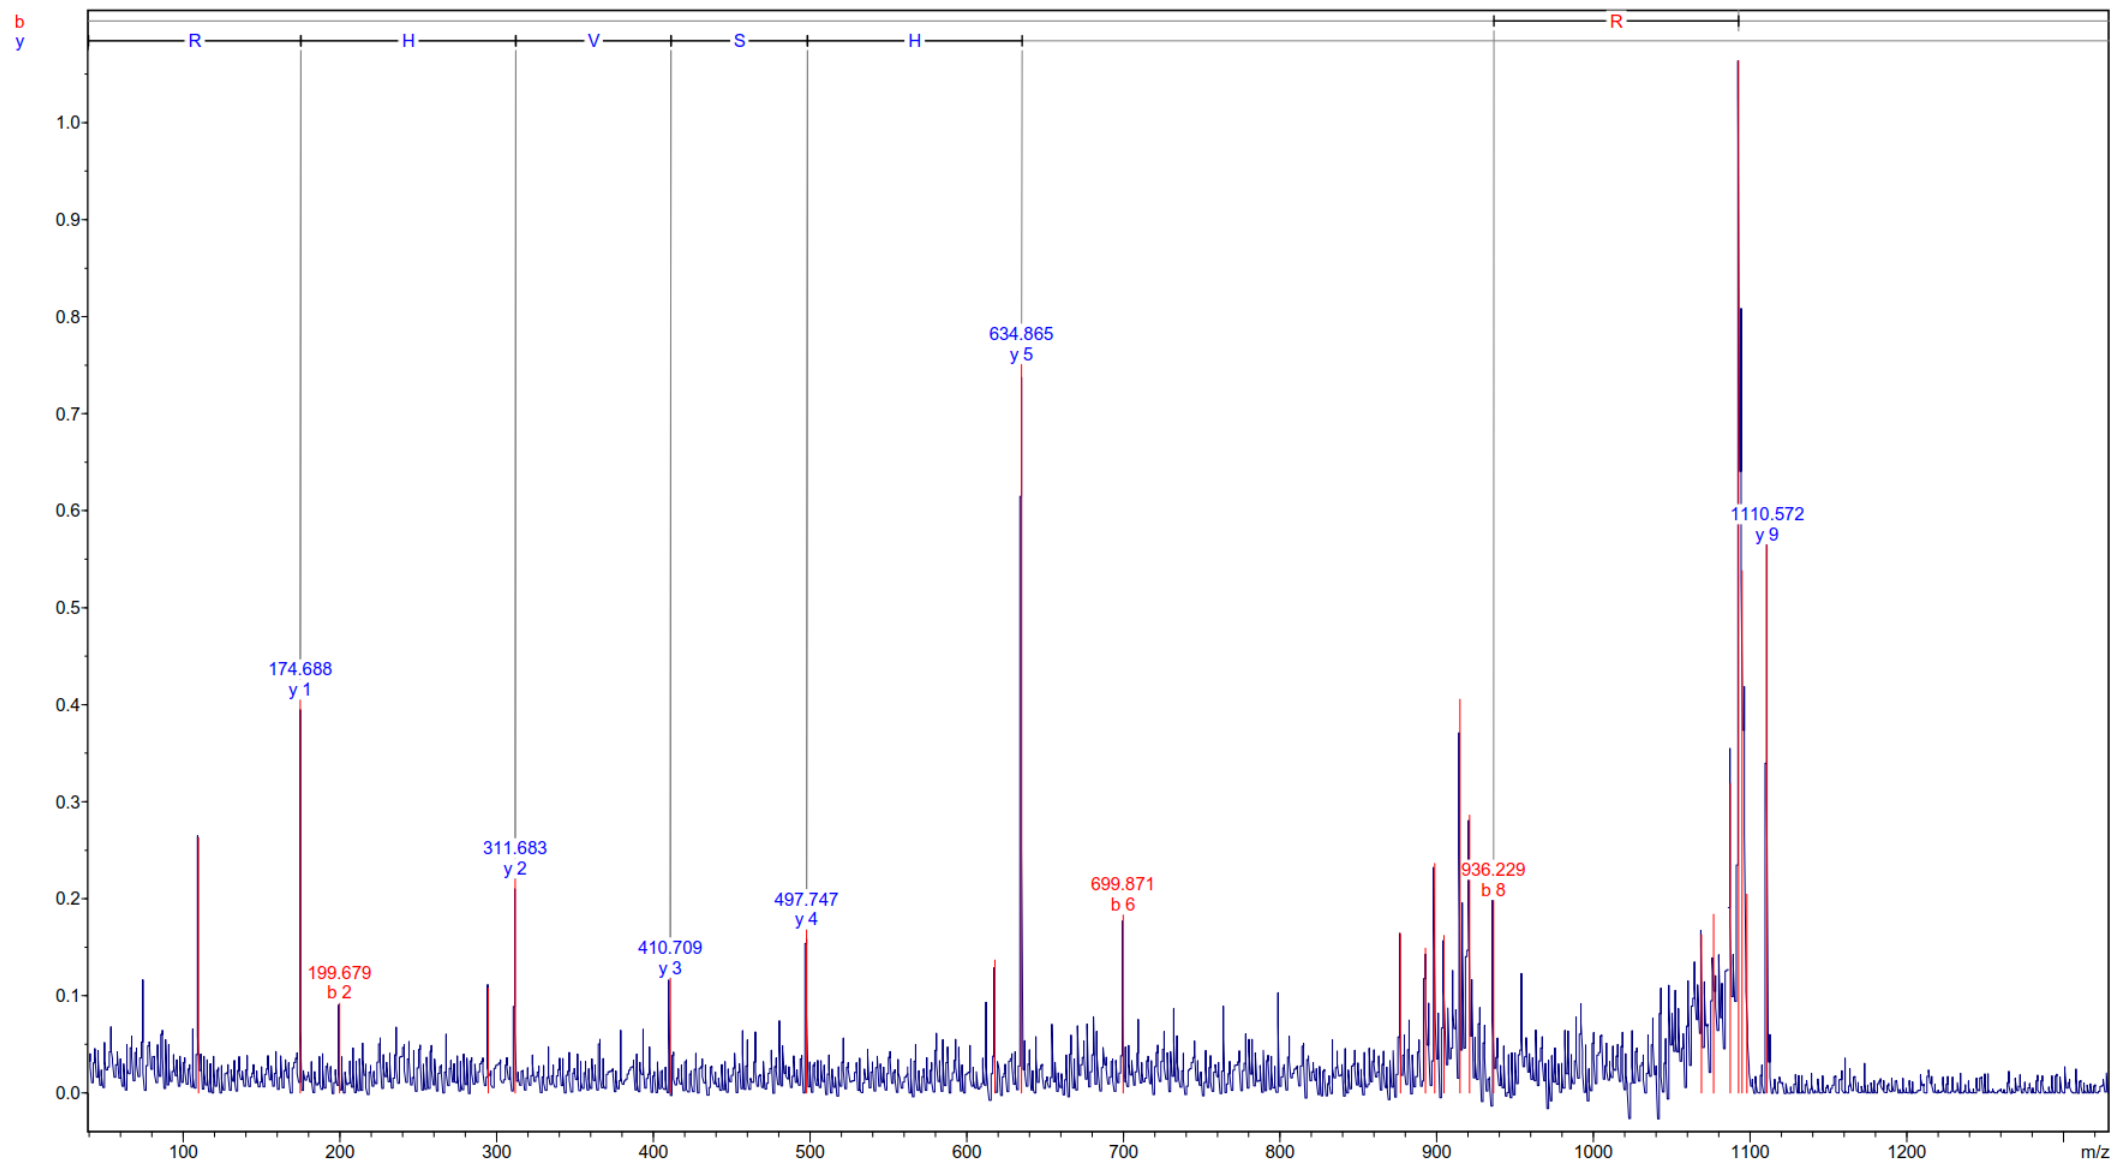

## Spectrum Analysis Report

### Display Parameter:

|                   |          |                     |       |                  |          |                  |          |
|-------------------|----------|---------------------|-------|------------------|----------|------------------|----------|
| Parentmass:       | 1110.568 | Mass Error:         | 0.024 | MH+ (mono):      | 1110.544 | MH+ (avg):       | 1111.193 |
| Threshold (a.i.): | 0.000    | Tolerance (Da):     | 0.700 | Number of Peaks: | 24       | Above Threshold: | 24       |
| Assigned Peaks:   | 13       | Not assigned Peaks: | 11    |                  |          |                  |          |

### Peaklist:

| Peak | Mass     | Intensity |
|------|----------|-----------|------|----------|-----------|------|----------|-----------|------|----------|-----------|------|----------|-----------|
| 1    | 109.733  | 263.440   | 2    | 174.688  | 404.901   | 3    | 199.679  | 92.783    | 4    | 294.683  | 108.316   | 5    | 311.683  | 220.689   |
| 6    | 410.709  | 118.327   | 7    | 497.747  | 168.366   | 8    | 617.888  | 137.200   | 9    | 634.865  | 751.043   | 10   | 699.871  | 183.594   |
| 11   | 876.657  | 164.425   | 12   | 892.665  | 149.207   | 13   | 898.643  | 236.513   | 14   | 904.576  | 162.422   | 15   | 914.721  | 405.917   |
| 16   | 920.853  | 286.376   | 17   | 936.229  | 198.534   | 18   | 1068.711 | 163.095   | 19   | 1076.547 | 184.110   | 20   | 1087.133 | 319.020   |
| 21   | 1092.520 | 1182.906  | 22   | 1094.732 | 538.609   | 23   | 1097.700 | 205.026   | 24   | 1110.572 | 564.973   |      |          |           |

### Calculated Masses:

QAFHSVHR

| N-Term. | Ion | a        | a-17     | a-18     | b               | b-17     | b-18     | b+18            | c        | i              | x        | y               | z              | C-Term. | Ion |
|---------|-----|----------|----------|----------|-----------------|----------|----------|-----------------|----------|----------------|----------|-----------------|----------------|---------|-----|
| 1       | Q   | 101.071  | 84.044   | 83.060   | 129.066         | 112.039  | 111.055  | 147.076         | 146.092  | 101.071        | 201.098  | <b>175.119</b>  | 158.092        | 9       | R   |
| 2       | A   | 172.108  | 155.082  | 154.097  | <b>200.103</b>  | 183.076  | 182.092  | 218.114         | 217.130  | 44.049         | 338.157  | <b>312.178</b>  | <b>295.151</b> | 8       | H   |
| 3       | F   | 319.176  | 302.150  | 301.166  | 347.171         | 330.145  | 329.161  | 365.182         | 364.198  | 120.081        | 437.226  | <b>411.246</b>  | 394.220        | 7       | V   |
| 4       | E   | 448.219  | 431.193  | 430.208  | 476.214         | 459.187  | 458.203  | 494.225         | 493.241  | 102.055        | 524.258  | <b>498.278</b>  | 481.252        | 6       | S   |
| 5       | H   | 585.278  | 568.251  | 567.267  | 613.273         | 596.246  | 595.262  | 631.283         | 630.299  | <b>110.071</b> | 661.316  | <b>635.337</b>  | <b>618.311</b> | 5       | H   |
| 6       | S   | 672.310  | 655.283  | 654.299  | <b>700.305</b>  | 683.278  | 682.294  | 718.315         | 717.331  | 60.044         | 790.359  | 764.380         | 747.353        | 4       | E   |
| 7       | V   | 771.378  | 754.352  | 753.368  | 799.373         | 782.347  | 781.363  | 817.384         | 816.400  | 72.081         | 937.427  | 911.448         | 894.422        | 3       | F   |
| 8       | H   | 908.437  | 891.411  | 890.427  | <b>936.432</b>  | 919.406  | 918.422  | 954.443         | 953.459  | <b>110.071</b> | 1008.465 | 982.485         | 965.459        | 2       | A   |
| 9       | R   | 1064.538 | 1047.512 | 1046.528 | <b>1092.533</b> | 1075.507 | 1074.523 | <b>1110.544</b> | 1109.560 | 129.113        | 1136.523 | <b>1110.544</b> | 1093.517       | 1       | Q   |

## CRISP parentmass 1168.696

## Spectrum Analysis Report

|                  |          |                   |          |                     |       |                  |          |
|------------------|----------|-------------------|----------|---------------------|-------|------------------|----------|
| Sequence Name:   |          | Parentmass:       | 1168.696 | Mass Error:         | 0.172 | MH+ (mono):      | 1168.523 |
| MH+ (avg):       | 1169.181 | Threshold (a.i.): | 0.000    | Tolerance (Da):     | 0.700 | Number of Peaks: | 40       |
| Above Threshold: | 40       | Assigned Peaks:   | 27       | Not assigned Peaks: | 13    |                  |          |

Abs. Int. \* 1000

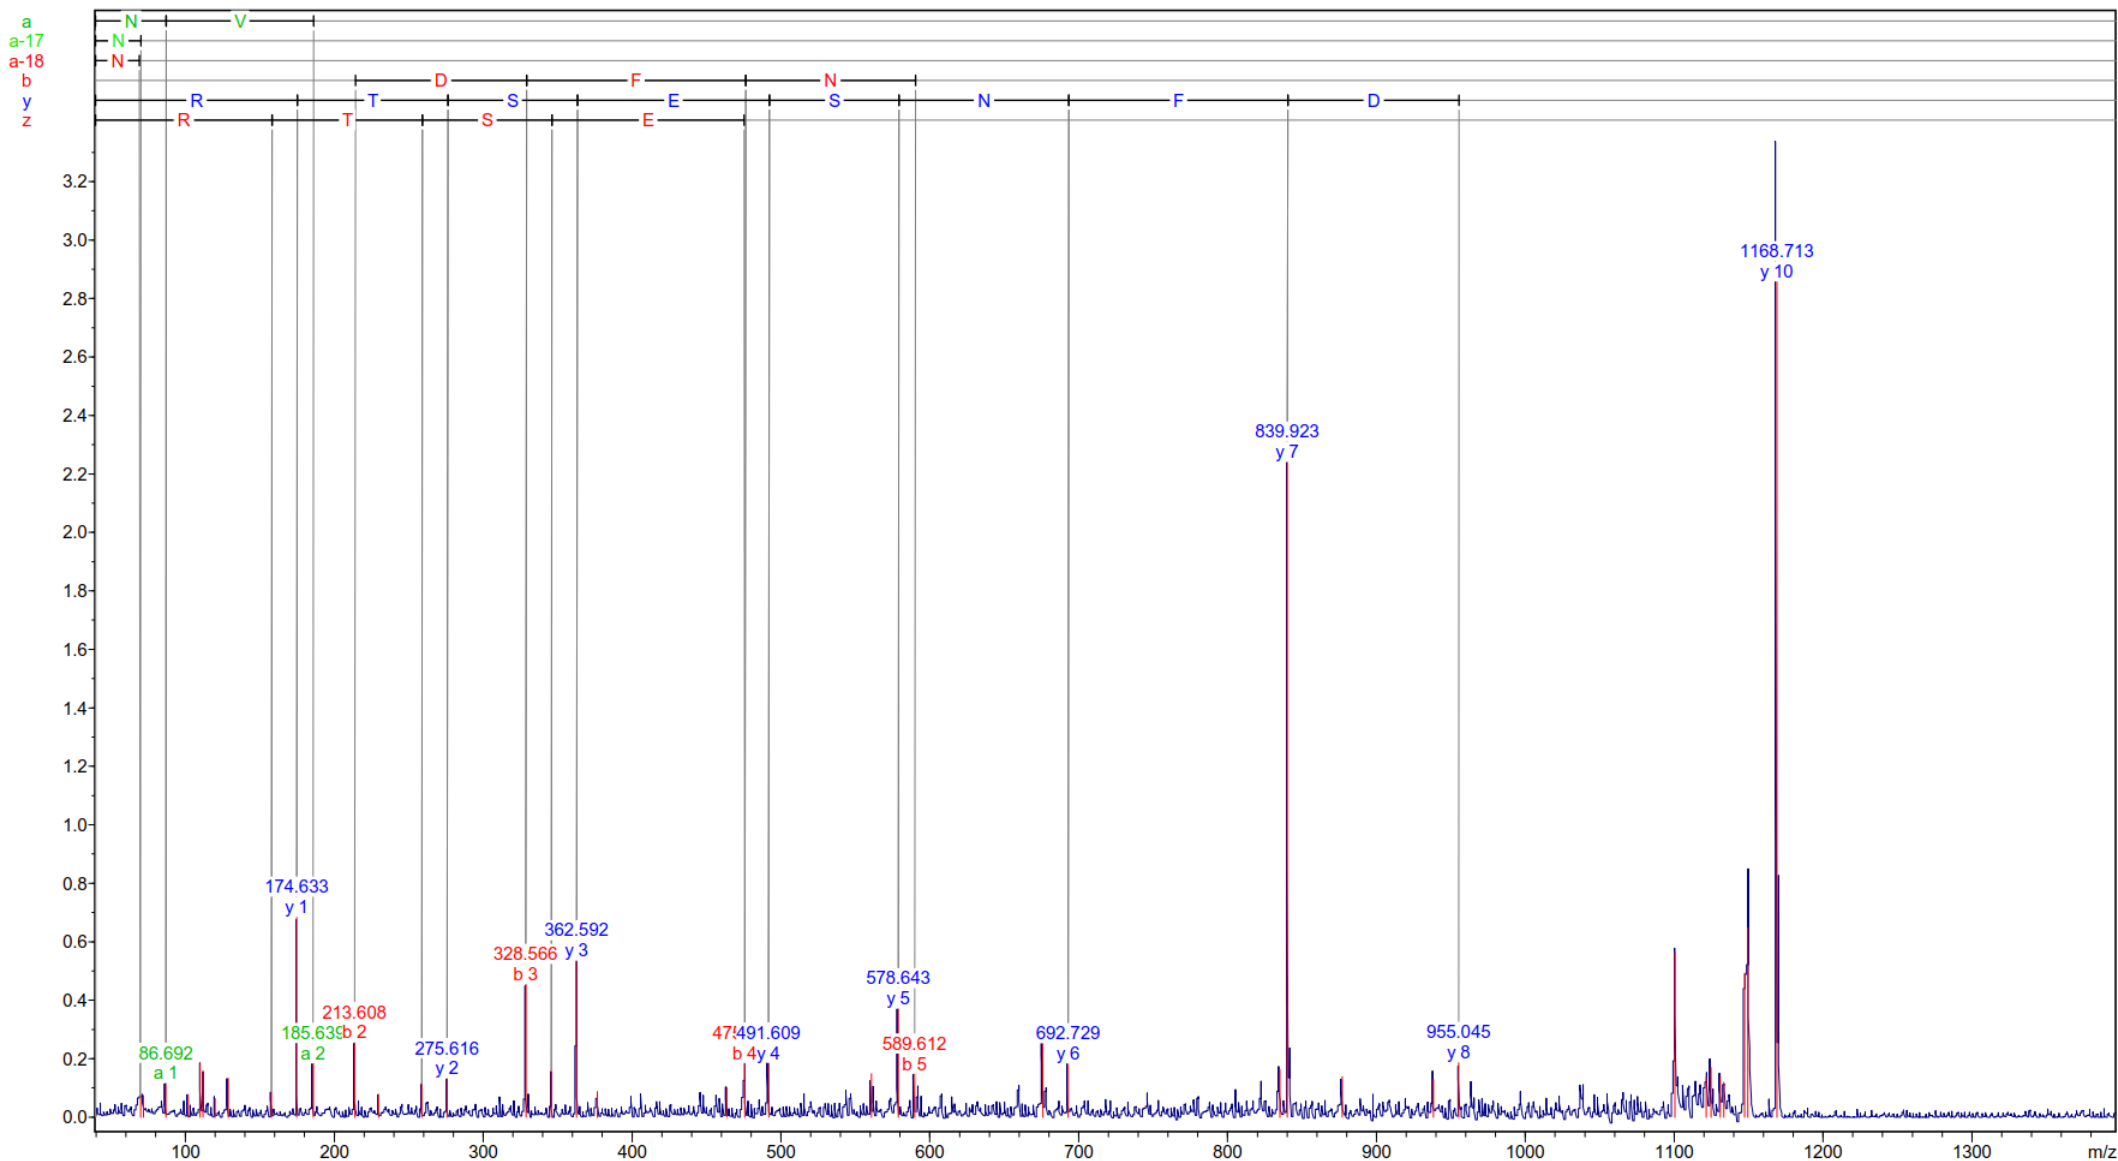

## Spectrum Analysis Report

### Display Parameter:

|                   |          |                     |       |                  |          |                  |          |
|-------------------|----------|---------------------|-------|------------------|----------|------------------|----------|
| Parentmass:       | 1168.696 | Mass Error:         | 0.172 | MH+ (mono):      | 1168.523 | MH+ (avg):       | 1169.181 |
| Threshold (a.i.): | 0.000    | Tolerance (Da):     | 0.700 | Number of Peaks: | 40       | Above Threshold: | 40       |
| Assigned Peaks:   | 27       | Not assigned Peaks: | 13    |                  |          |                  |          |

### Peaklist:

| Peak | Mass     | Intensity |
|------|----------|-----------|------|----------|-----------|------|----------|-----------|------|----------|-----------|------|----------|-----------|
| 1    | 69.659   | 70.117    | 2    | 71.750   | 74.967    | 3    | 86.692   | 116.206   | 4    | 101.662  | 78.675    | 5    | 109.654  | 185.420   |
| 6    | 111.701  | 159.314   | 7    | 119.671  | 64.549    | 8    | 128.668  | 134.153   | 9    | 157.627  | 87.235    | 10   | 174.633  | 683.940   |
| 11   | 185.639  | 184.329   | 12   | 213.608  | 255.410   | 13   | 229.587  | 77.968    | 14   | 258.610  | 114.569   | 15   | 275.616  | 132.404   |
| 16   | 328.566  | 454.828   | 17   | 345.552  | 159.834   | 18   | 362.592  | 535.385   | 19   | 376.534  | 88.508    | 20   | 463.571  | 102.459   |
| 21   | 475.614  | 185.102   | 22   | 491.609  | 185.387   | 23   | 560.590  | 148.923   | 24   | 578.643  | 371.533   | 25   | 589.612  | 148.238   |
| 26   | 675.692  | 298.153   | 27   | 692.729  | 183.452   | 28   | 834.887  | 163.368   | 29   | 839.923  | 2241.203  | 30   | 876.877  | 139.375   |
| 31   | 937.977  | 129.813   | 32   | 955.045  | 186.902   | 33   | 1100.254 | 564.225   | 34   | 1121.279 | 136.176   | 35   | 1124.453 | 170.610   |
| 36   | 1130.675 | 140.668   | 37   | 1133.176 | 120.222   | 38   | 1147.104 | 493.545   | 39   | 1149.226 | 648.364   | 40   | 1168.713 | 2858.462  |

### Calculated Masses:

NVDFNSESTR

| N-Term. | Ion | a        | a-17     | a-18     | b        | b-17     | b-18     | b+18     | c        | i       | x        | y        | z        | C-Term. | Ion |
|---------|-----|----------|----------|----------|----------|----------|----------|----------|----------|---------|----------|----------|----------|---------|-----|
| 1       | N   | 87.055   | 70.029   | 69.045   | 115.050  | 98.024   | 97.040   | 133.061  | 132.077  | 87.055  | 201.098  | 175.119  | 158.092  | 10      | R   |
| 2       | V   | 186.124  | 169.097  | 168.113  | 214.119  | 197.092  | 196.108  | 232.129  | 231.145  | 72.081  | 302.146  | 276.167  | 259.140  | 9       | T   |
| 3       | D   | 301.151  | 284.124  | 283.140  | 329.146  | 312.119  | 311.135  | 347.156  | 346.172  | 88.039  | 389.178  | 363.199  | 346.172  | 8       | S   |
| 4       | F   | 448.219  | 431.193  | 430.208  | 476.214  | 459.187  | 458.203  | 494.225  | 493.241  | 120.081 | 518.221  | 492.241  | 475.215  | 7       | E   |
| 5       | N   | 562.262  | 545.235  | 544.251  | 590.257  | 573.230  | 572.246  | 608.267  | 607.283  | 87.055  | 605.253  | 579.273  | 562.247  | 6       | S   |
| 6       | S   | 649.294  | 632.267  | 631.283  | 677.289  | 660.262  | 659.278  | 695.299  | 694.315  | 60.044  | 719.295  | 693.316  | 676.290  | 5       | N   |
| 7       | E   | 778.337  | 761.310  | 760.326  | 806.332  | 789.305  | 788.321  | 824.342  | 823.358  | 102.055 | 866.364  | 840.385  | 823.358  | 4       | F   |
| 8       | S   | 865.369  | 848.342  | 847.358  | 893.364  | 876.337  | 875.353  | 911.374  | 910.390  | 60.044  | 981.391  | 955.412  | 938.385  | 3       | D   |
| 9       | T   | 966.416  | 949.390  | 948.406  | 994.411  | 977.385  | 976.401  | 1012.422 | 1011.438 | 74.060  | 1080.459 | 1054.480 | 1037.453 | 2       | V   |
| 10      | R   | 1122.517 | 1105.491 | 1104.507 | 1150.512 | 1133.486 | 1132.502 | 1168.523 | 1167.539 | 129.113 | 1194.502 | 1168.523 | 1151.496 | 1       | N   |

CRISP parentmass 1195.609

Spectrum Analysis Report

|                  |          |                   |          |                     |        |                  |          |
|------------------|----------|-------------------|----------|---------------------|--------|------------------|----------|
| Sequence Name:   |          | Parentmass:       | 1195.609 | Mass Error:         | -0.035 | MH+ (mono):      | 1195.644 |
| MH+ (avg):       | 1196.336 | Threshold (a.i.): | 0.000    | Tolerance (Da):     | 0.700  | Number of Peaks: | 39       |
| Above Threshold: | 39       | Assigned Peaks:   | 31       | Not assigned Peaks: | 8      |                  |          |

Abs. Int. \* 1000

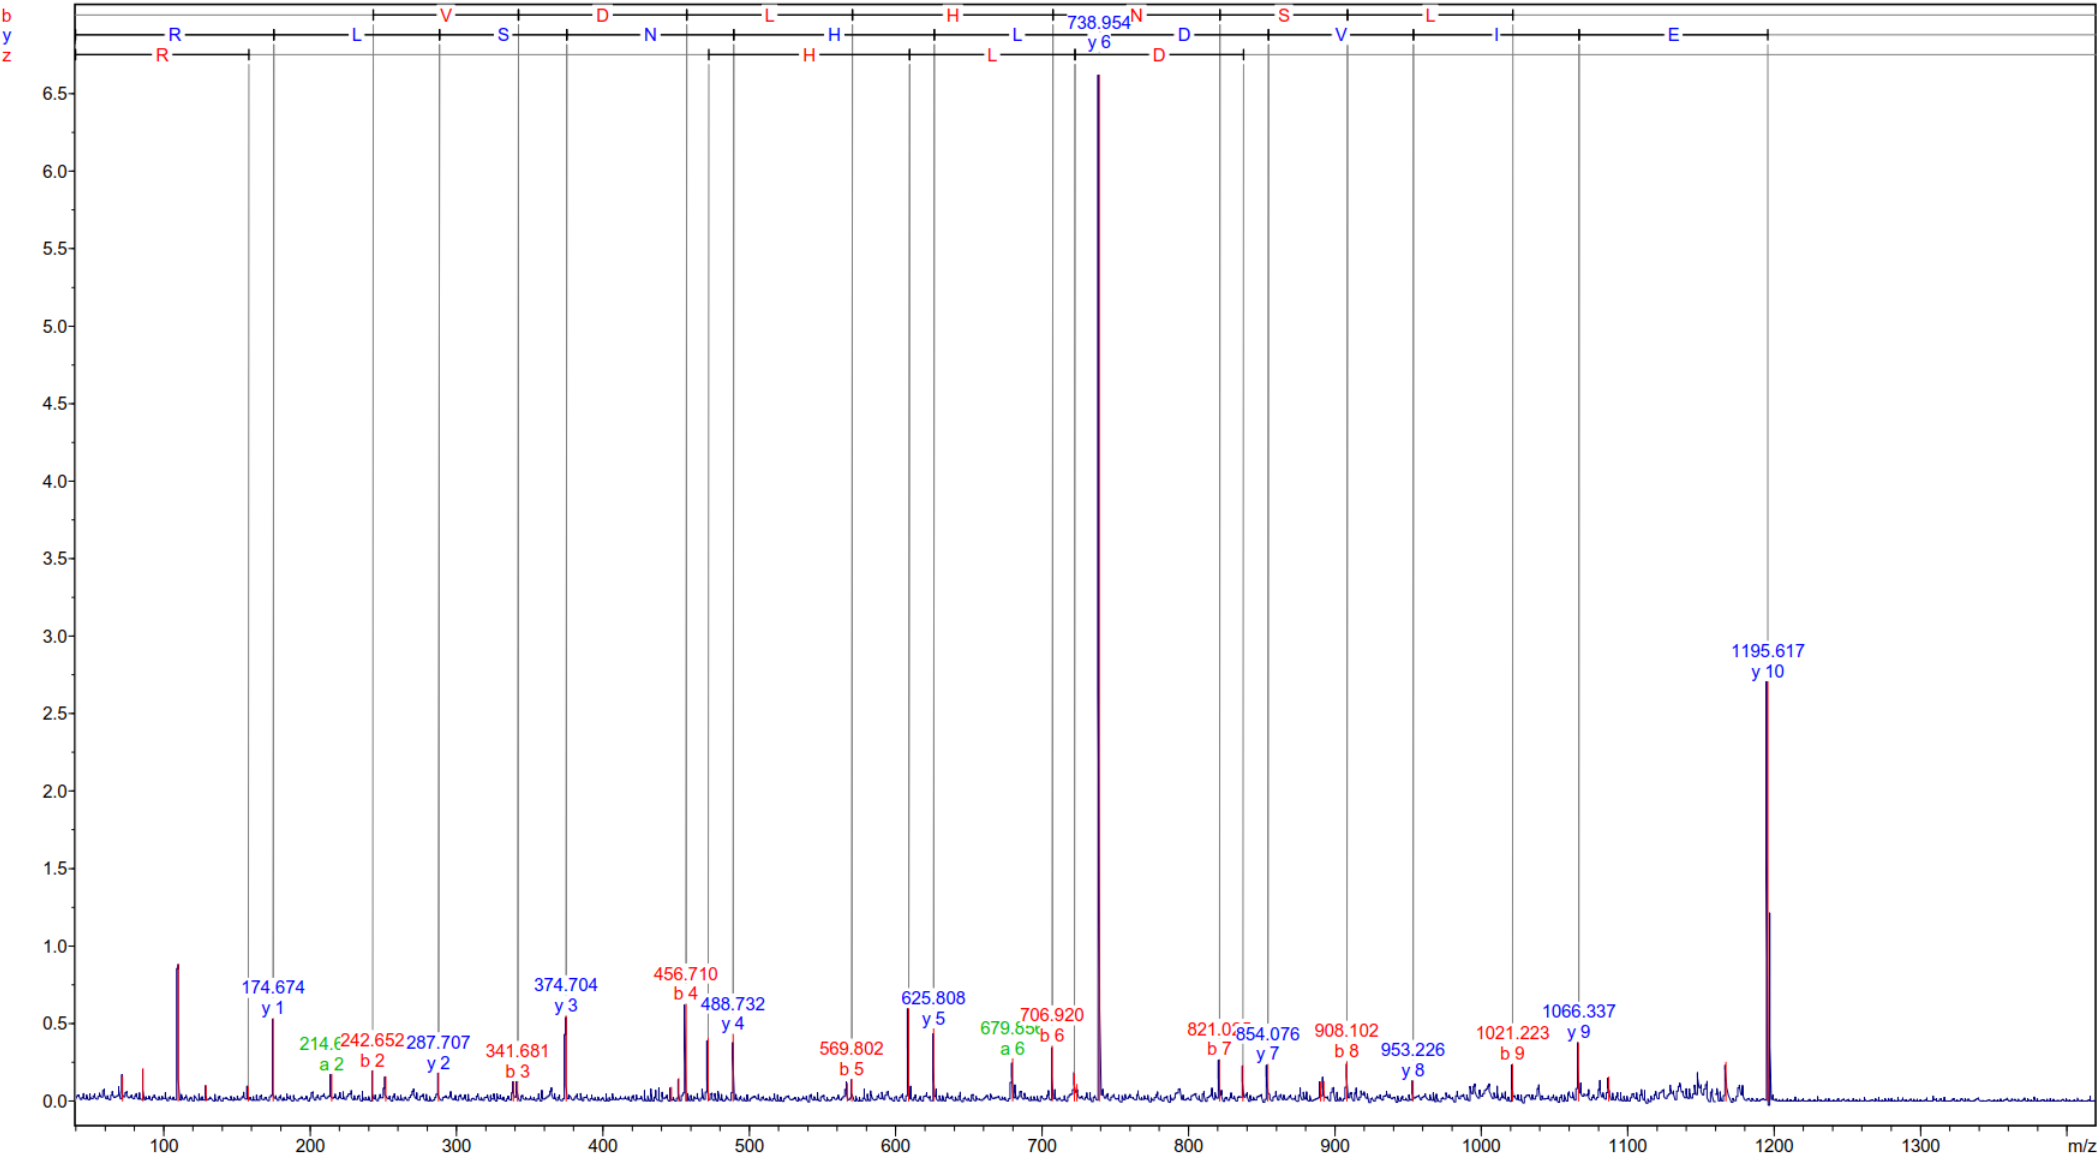

## Spectrum Analysis Report

### Display Parameter:

|                   |          |                     |        |                  |          |                  |          |
|-------------------|----------|---------------------|--------|------------------|----------|------------------|----------|
| Parentmass:       | 1195.609 | Mass Error:         | -0.035 | MH+ (mono):      | 1195.644 | MH+ (avg):       | 1196.336 |
| Threshold (a.i.): | 0.000    | Tolerance (Da):     | 0.700  | Number of Peaks: | 39       | Above Threshold: | 39       |
| Assigned Peaks:   | 31       | Not assigned Peaks: | 8      |                  |          |                  |          |

### Peaklist:

| Peak | Mass     | Intensity |
|------|----------|-----------|------|----------|-----------|------|----------|-----------|------|----------|-----------|------|----------|-----------|
| 1    | 71.774   | 163.124   | 2    | 85.767   | 209.551   | 3    | 109.710  | 882.222   | 4    | 128.719  | 99.408    | 5    | 157.665  | 96.480    |
| 6    | 174.674  | 532.781   | 7    | 214.649  | 174.915   | 8    | 242.652  | 197.926   | 9    | 251.635  | 158.944   | 10   | 287.707  | 183.626   |
| 11   | 338.637  | 135.096   | 12   | 341.681  | 127.046   | 13   | 374.704  | 551.107   | 14   | 446.685  | 89.170    | 15   | 451.708  | 146.577   |
| 16   | 456.710  | 625.885   | 17   | 471.704  | 408.133   | 18   | 488.732  | 433.293   | 19   | 566.762  | 115.497   | 20   | 569.802  | 141.802   |
| 21   | 608.807  | 679.907   | 22   | 625.808  | 467.170   | 23   | 679.856  | 276.576   | 24   | 706.920  | 355.290   | 25   | 721.964  | 182.172   |
| 26   | 723.717  | 109.390   | 27   | 738.954  | 6764.837  | 28   | 821.025  | 269.550   | 29   | 837.026  | 229.429   | 30   | 854.076  | 237.628   |
| 31   | 890.082  | 125.453   | 32   | 892.254  | 127.576   | 33   | 908.102  | 257.531   | 34   | 953.226  | 132.610   | 35   | 1021.223 | 239.794   |
| 36   | 1066.337 | 377.855   | 37   | 1087.082 | 155.203   | 38   | 1166.924 | 250.794   | 39   | 1195.617 | 2707.766  |      |          |           |

### Calculated Masses:

EIVDLHNSLR

| N-Term. | Ion | a        | a-17     | a-18     | b        | b-17     | b-18     | b+18     | c        | i       | x        | y        | z        | C-Term. | Ion |
|---------|-----|----------|----------|----------|----------|----------|----------|----------|----------|---------|----------|----------|----------|---------|-----|
| 1       | E   | 102.055  | 85.028   | 84.044   | 130.050  | 113.023  | 112.039  | 148.060  | 147.076  | 102.055 | 201.098  | 175.119  | 158.092  | 10      | R   |
| 2       | I   | 215.139  | 198.112  | 197.128  | 243.134  | 226.107  | 225.123  | 261.144  | 260.160  | 86.096  | 314.182  | 288.203  | 271.176  | 9       | L   |
| 3       | V   | 314.207  | 297.181  | 296.197  | 342.202  | 325.176  | 324.192  | 360.213  | 359.229  | 72.081  | 401.214  | 375.235  | 358.208  | 8       | S   |
| 4       | D   | 429.234  | 412.208  | 411.224  | 457.229  | 440.203  | 439.219  | 475.240  | 474.256  | 88.039  | 515.257  | 489.278  | 472.251  | 7       | N   |
| 5       | L   | 542.318  | 525.292  | 524.308  | 570.313  | 553.287  | 552.303  | 588.324  | 587.340  | 86.096  | 652.316  | 626.337  | 609.310  | 6       | H   |
| 6       | H   | 679.377  | 662.351  | 661.367  | 707.372  | 690.346  | 689.362  | 725.383  | 724.399  | 110.071 | 765.400  | 739.421  | 722.394  | 5       | L   |
| 7       | N   | 793.420  | 776.394  | 775.410  | 821.415  | 804.389  | 803.405  | 839.426  | 838.442  | 87.055  | 880.427  | 854.448  | 837.421  | 4       | D   |
| 8       | S   | 880.452  | 863.426  | 862.442  | 908.447  | 891.421  | 890.437  | 926.458  | 925.474  | 60.044  | 979.496  | 953.516  | 936.490  | 3       | V   |
| 9       | L   | 993.536  | 976.510  | 975.526  | 1021.531 | 1004.505 | 1003.521 | 1039.542 | 1038.558 | 86.096  | 1092.580 | 1066.600 | 1049.574 | 2       | I   |
| 10      | R   | 1149.637 | 1132.611 | 1131.627 | 1177.632 | 1160.606 | 1159.622 | 1195.643 | 1194.659 | 129.113 | 1221.622 | 1195.643 | 1178.616 | 1       | E   |

## CRISP parentmass 1553.910

## Spectrum Analysis Report

|                  |          |                   |          |                     |       |                  |          |
|------------------|----------|-------------------|----------|---------------------|-------|------------------|----------|
| Sequence Name:   |          | Parentmass:       | 1553.910 | Mass Error:         | 0.241 | MH+ (mono):      | 1553.669 |
| MH+ (avg):       | 1554.663 | Threshold (a.i.): | 0.000    | Tolerance (Da):     | 0.700 | Number of Peaks: | 67       |
| Above Threshold: | 67       | Assigned Peaks:   | 34       | Not assigned Peaks: | 33    |                  |          |

Abs. Int. \* 1000

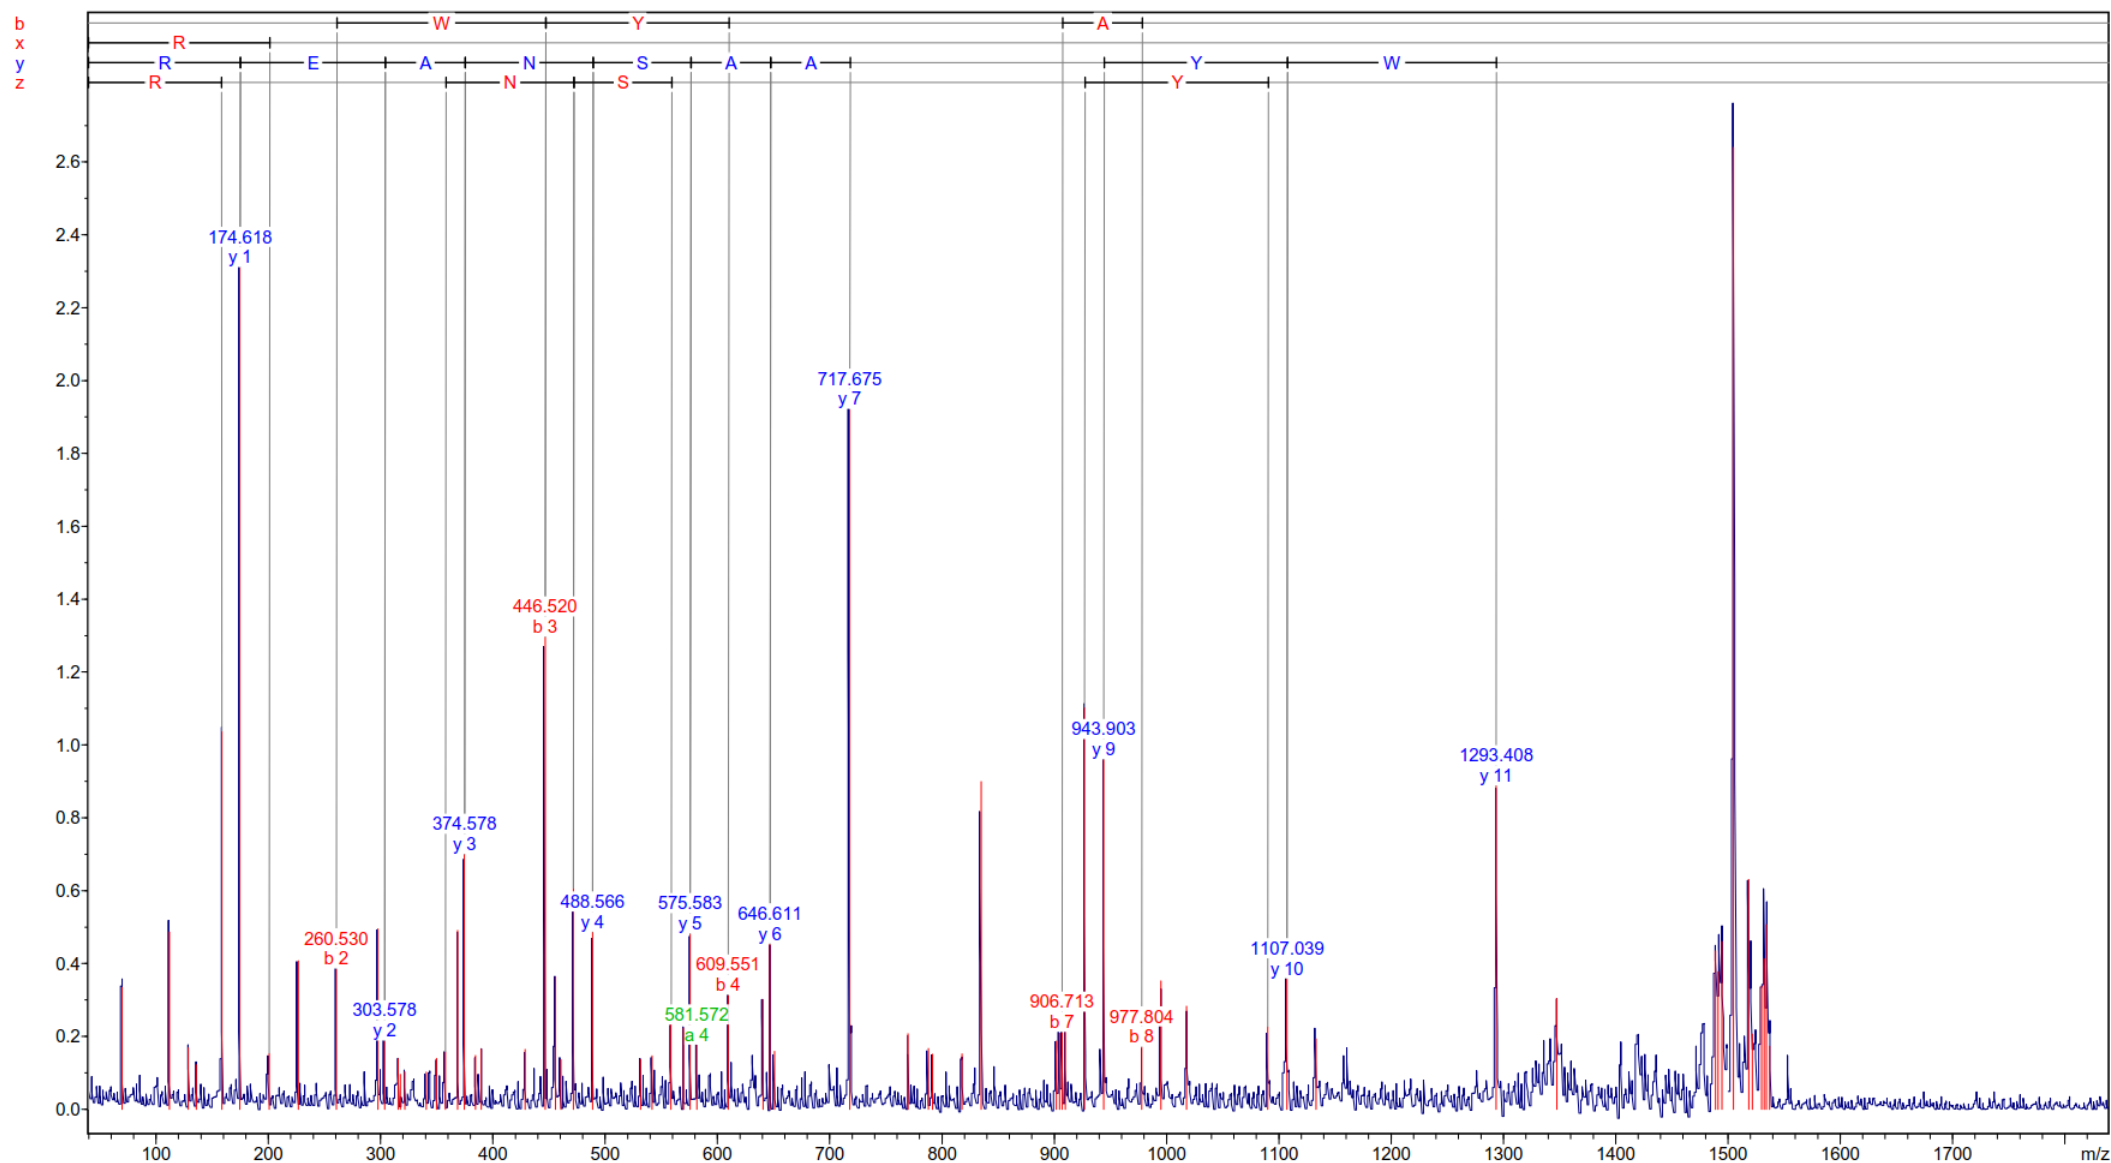

## Spectrum Analysis Report

### Display Parameter:

|                         |                        |                      |
|-------------------------|------------------------|----------------------|
| Parentmass: 1553.910    | Mass Error: 0.241      | MH+ (mono): 1553.669 |
| Threshold (a.i.): 0.000 | Tolerance (Da): 0.700  | MH+ (avg): 1554.663  |
| Assigned Peaks: 34      | Not assigned Peaks: 33 | Above Threshold: 67  |

### Peaklist:

| Peak | Mass     | Intensity |
|------|----------|-----------|------|----------|-----------|------|----------|-----------|------|----------|-----------|------|----------|-----------|
| 1    | 69.702   | 335.297   | 2    | 111.668  | 486.549   | 3    | 128.649  | 168.849   | 4    | 135.639  | 122.837   | 5    | 158.611  | 1037.570  |
| 6    | 174.618  | 2311.164  | 7    | 200.576  | 153.486   | 8    | 226.552  | 407.711   | 9    | 260.530  | 385.479   | 10   | 297.548  | 495.571   |
| 11   | 303.578  | 187.875   | 12   | 315.540  | 139.046   | 13   | 317.491  | 96.029    | 14   | 321.572  | 103.094   | 15   | 340.554  | 102.111   |
| 16   | 349.525  | 139.981   | 17   | 357.545  | 157.411   | 18   | 368.566  | 491.579   | 19   | 374.578  | 700.442   | 20   | 384.527  | 147.642   |
| 21   | 389.559  | 165.525   | 22   | 428.547  | 164.283   | 23   | 446.520  | 1296.940  | 24   | 455.550  | 363.777   | 25   | 460.512  | 136.654   |
| 26   | 471.556  | 607.480   | 27   | 488.566  | 486.829   | 28   | 531.545  | 137.817   | 29   | 541.550  | 146.947   | 30   | 558.600  | 242.603   |
| 31   | 569.583  | 223.660   | 32   | 575.583  | 482.349   | 33   | 581.572  | 176.798   | 34   | 609.551  | 313.638   | 35   | 640.627  | 301.970   |
| 36   | 646.611  | 454.667   | 37   | 650.638  | 159.795   | 38   | 717.675  | 1922.302  | 39   | 769.688  | 207.413   | 40   | 787.712  | 167.169   |
| 41   | 791.598  | 151.734   | 42   | 817.737  | 152.606   | 43   | 834.735  | 900.071   | 44   | 901.791  | 187.610   | 45   | 904.656  | 209.423   |
| 46   | 906.713  | 211.662   | 47   | 909.793  | 214.469   | 48   | 926.860  | 1102.507  | 49   | 943.903  | 960.531   | 50   | 977.804  | 171.536   |
| 51   | 994.820  | 352.601   | 52   | 1017.770 | 282.936   | 53   | 1090.066 | 226.329   | 54   | 1107.039 | 358.748   | 55   | 1133.028 | 193.496   |
| 56   | 1293.408 | 888.326   | 57   | 1347.429 | 304.728   | 58   | 1488.683 | 435.126   | 59   | 1491.130 | 378.001   | 60   | 1494.435 | 460.441   |
| 61   | 1504.881 | 2640.884  | 62   | 1518.366 | 630.611   | 63   | 1521.608 | 207.048   | 64   | 1529.847 | 338.073   | 65   | 1531.990 | 413.404   |
| 66   | 1534.226 | 506.873   | 67   | 1537.055 | 173.315   |      |          |           |      |          |           |      |          |           |

### Calculated Masses:

MEWYPEAASNAER

| N-Term. | Ion | a              | a-17            | a-18            | b              | b-17            | b-18           | b+18     | c              | i              | x               | y               | z               | C-Term. | Ion |
|---------|-----|----------------|-----------------|-----------------|----------------|-----------------|----------------|----------|----------------|----------------|-----------------|-----------------|-----------------|---------|-----|
| 1       | M   | 104.053        | 87.026          | 86.042          | 132.048        | 115.021         | 114.037        | 150.058  | 149.074        | 104.053        | <b>201.098</b>  | <b>175.119</b>  | <b>158.092</b>  | 13      | R   |
| 2       | E   | 233.095        | 216.069         | 215.085         | <b>261.090</b> | 244.064         | 243.080        | 279.101  | 278.117        | 102.055        | 330.141         | <b>304.162</b>  | 287.135         | 12      | E   |
| 3       | W   | 419.175        | 402.148         | 401.164         | <b>447.170</b> | 430.143         | <b>429.159</b> | 465.180  | 464.196        | <b>159.092</b> | 401.178         | <b>375.199</b>  | <b>358.172</b>  | 11      | A   |
| 4       | Y   | <b>582.238</b> | 565.212         | 564.228         | <b>610.233</b> | 593.206         | 592.222        | 628.244  | 627.260        | <b>136.076</b> | 515.221         | <b>489.242</b>  | <b>472.215</b>  | 10      | N   |
| 5       | P   | 679.291        | 662.264         | 661.280         | 707.286        | 690.259         | 689.275        | 725.296  | 724.312        | <b>70.065</b>  | 602.253         | <b>576.274</b>  | <b>559.247</b>  | 9       | S   |
| 6       | E   | 808.333        | <b>791.307</b>  | 790.323         | 836.328        | 819.302         | <b>818.318</b> | 854.339  | 853.355        | 102.055        | 673.290         | <b>647.311</b>  | 630.284         | 8       | A   |
| 7       | A   | 879.371        | 862.344         | 861.360         | <b>907.365</b> | 890.339         | 889.355        | 925.376  | 924.392        | 44.049         | 744.327         | <b>718.348</b>  | 701.321         | 7       | A   |
| 8       | A   | 950.408        | 933.381         | 932.397         | <b>978.403</b> | 961.376         | 960.392        | 996.413  | <b>995.429</b> | 44.049         | 873.370         | 847.390         | 830.364         | 6       | E   |
| 9       | S   | 1037.440       | 1020.413        | 1019.429        | 1065.435       | 1048.408        | 1047.424       | 1083.445 | 1082.461       | 60.044         | 970.422         | <b>944.443</b>  | <b>927.417</b>  | 5       | P   |
| 10      | N   | 1151.483       | 1134.456        | <b>1133.472</b> | 1179.478       | 1162.451        | 1161.467       | 1197.488 | 1196.504       | 87.055         | <b>1133.486</b> | <b>1107.507</b> | <b>1090.480</b> | 4       | Y   |
| 11      | A   | 1222.520       | 1205.493        | 1204.509        | 1250.515       | 1233.488        | 1232.504       | 1268.525 | 1267.541       | 44.049         | 1319.565        | <b>1293.586</b> | 1276.559        | 3       | W   |
| 12      | E   | 1351.562       | 1334.536        | 1333.552        | 1379.557       | 1362.531        | 1361.547       | 1397.568 | 1396.584       | 102.055        | 1448.608        | 1422.628        | 1405.602        | 2       | E   |
| 13      | R   | 1507.663       | <b>1490.637</b> | 1489.653        | 1535.658       | <b>1518.632</b> | 1517.648       | 1553.669 | 1552.685       | <b>129.113</b> | 1579.648        | 1553.669        | <b>1536.642</b> | 1       | M   |

## CVF parentmass 1306.709

## Spectrum Analysis Report

|                  |          |                   |          |                     |       |                  |          |
|------------------|----------|-------------------|----------|---------------------|-------|------------------|----------|
| Sequence Name:   |          | Parentmass:       | 1306.709 | Mass Error:         | 0.062 | MH+ (mono):      | 1306.647 |
| MH+ (avg):       | 1307.499 | Threshold (a.i.): | 0.000    | Tolerance (Da):     | 0.700 | Number of Peaks: | 54       |
| Above Threshold: | 54       | Assigned Peaks:   | 28       | Not assigned Peaks: | 26    |                  |          |

Abs. Int. \* 1000

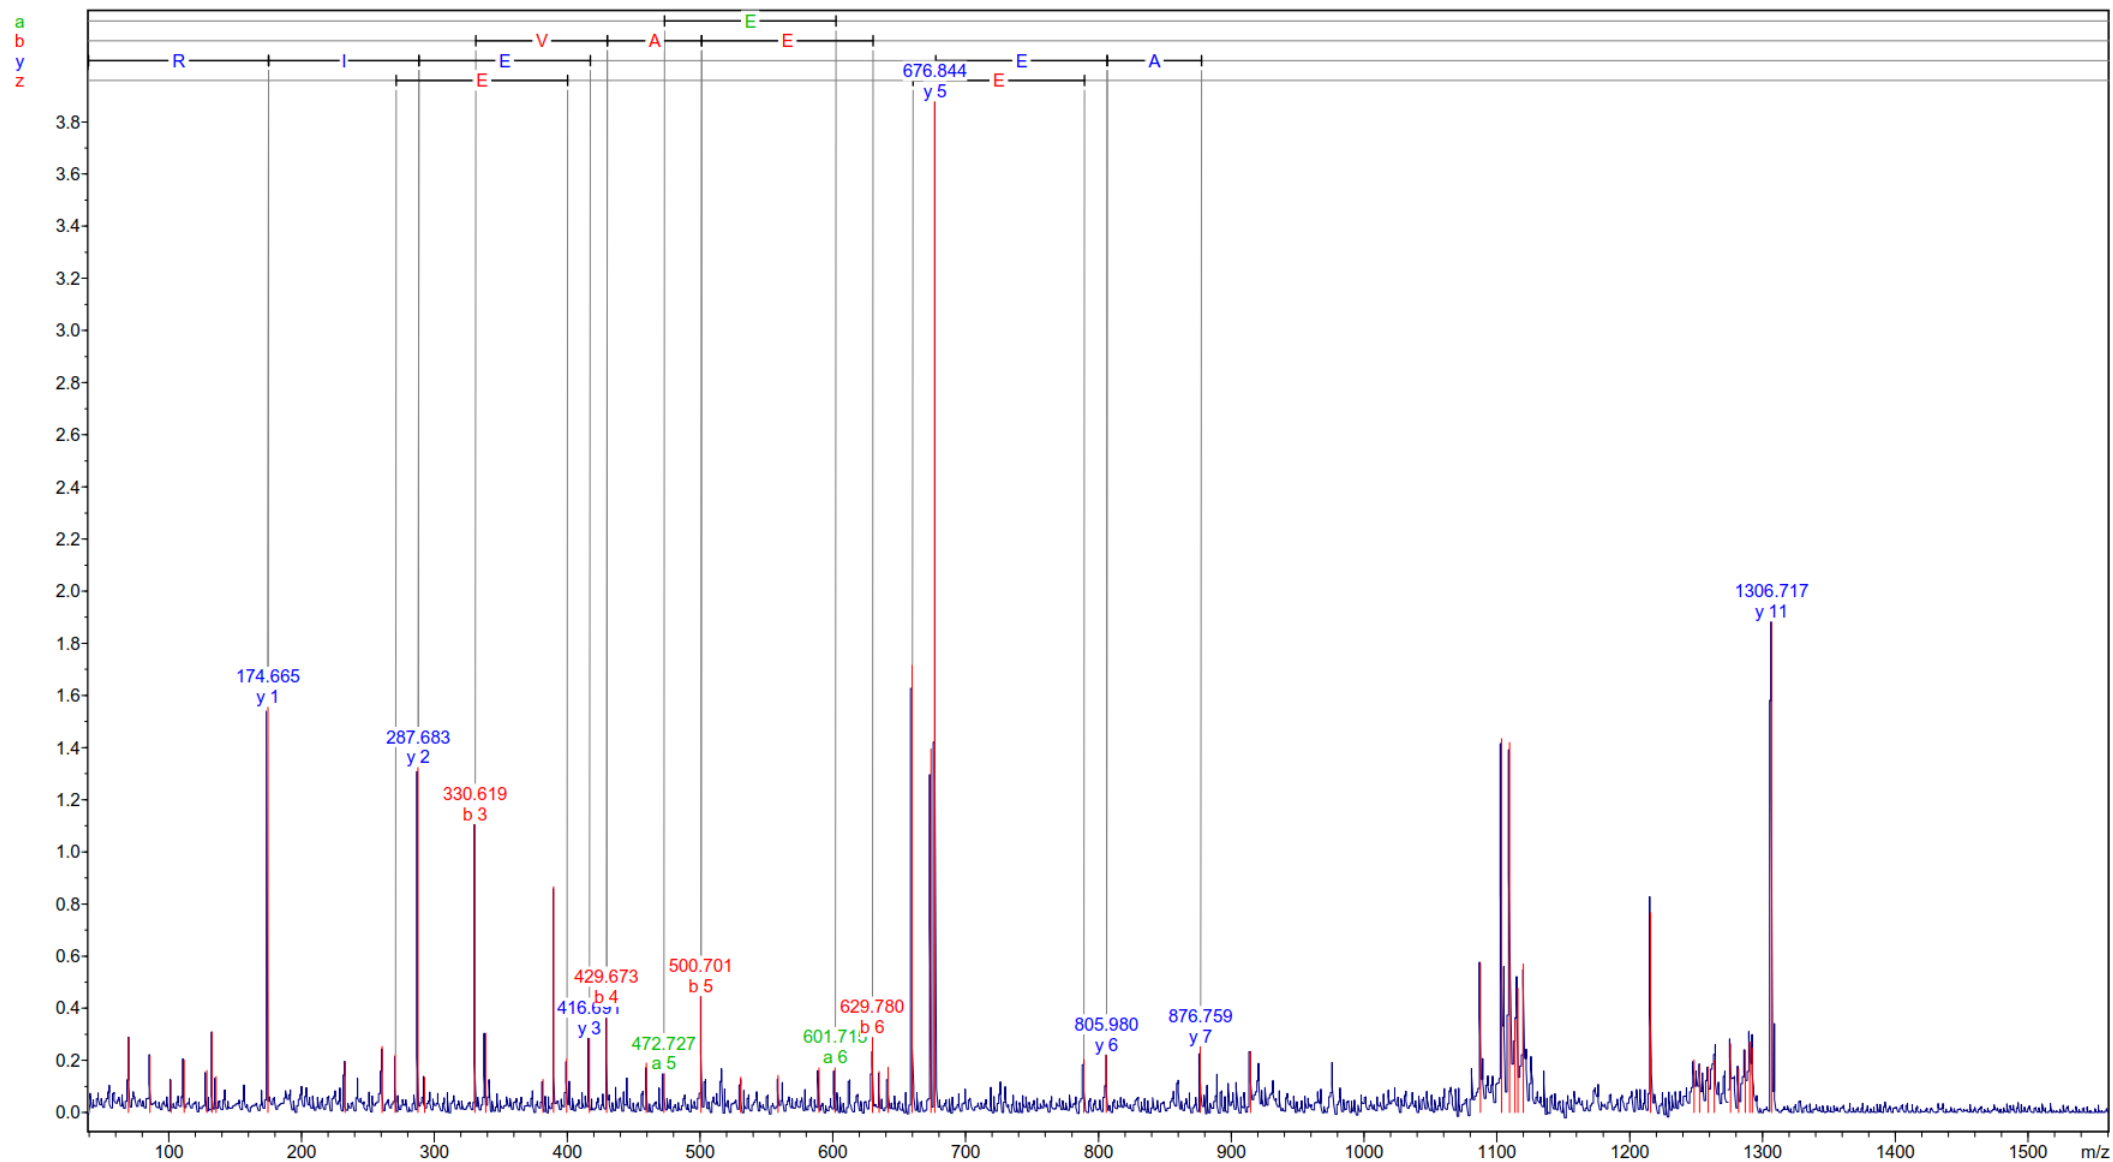

## Spectrum Analysis Report

### Display Parameter:

|                   |          |                     |       |                  |          |                  |          |
|-------------------|----------|---------------------|-------|------------------|----------|------------------|----------|
| Parentmass:       | 1306.709 | Mass Error:         | 0.062 | MH+ (mono):      | 1306.647 | MH+ (avg):       | 1307.499 |
| Threshold (a.i.): | 0.000    | Tolerance (Da):     | 0.700 | Number of Peaks: | 54       | Above Threshold: | 54       |
| Assigned Peaks:   | 28       | Not assigned Peaks: | 26    |                  |          |                  |          |

### Peaklist:

| Peak | Mass     | Intensity |
|------|----------|-----------|------|----------|-----------|------|----------|-----------|------|----------|-----------|------|----------|-----------|
| 1    | 69.757   | 287.777   | 2    | 85.737   | 216.113   | 3    | 101.658  | 125.057   | 4    | 111.711  | 202.205   | 5    | 128.720  | 160.935   |
| 6    | 132.642  | 308.162   | 7    | 135.696  | 138.337   | 8    | 174.665  | 1555.374  | 9    | 232.634  | 194.388   | 10   | 260.628  | 253.219   |
| 11   | 270.656  | 221.666   | 12   | 287.683  | 1323.974  | 13   | 292.604  | 136.239   | 14   | 330.619  | 1105.275  | 15   | 338.685  | 303.891   |
| 16   | 381.699  | 126.875   | 17   | 389.644  | 865.618   | 18   | 399.671  | 206.850   | 19   | 416.691  | 285.839   | 20   | 429.673  | 405.409   |
| 21   | 459.645  | 189.185   | 22   | 472.727  | 149.918   | 23   | 500.701  | 446.332   | 24   | 530.728  | 135.349   | 25   | 558.834  | 143.466   |
| 26   | 589.748  | 171.260   | 27   | 601.715  | 172.331   | 28   | 629.780  | 290.093   | 29   | 634.877  | 157.642   | 30   | 641.768  | 173.500   |
| 31   | 659.812  | 1717.158  | 32   | 673.882  | 1395.395  | 33   | 676.844  | 3878.330  | 34   | 788.937  | 207.291   | 35   | 805.980  | 221.756   |
| 36   | 876.759  | 253.958   | 37   | 914.462  | 233.214   | 38   | 1087.582 | 572.567   | 39   | 1103.530 | 1434.413  | 40   | 1109.639 | 1419.645  |
| 41   | 1113.751 | 354.398   | 42   | 1115.814 | 477.460   | 43   | 1120.018 | 570.742   | 44   | 1215.631 | 766.735   | 45   | 1248.473 | 202.000   |
| 46   | 1252.513 | 181.848   | 47   | 1259.156 | 175.384   | 48   | 1263.668 | 200.316   | 49   | 1275.971 | 263.884   | 50   | 1281.928 | 169.473   |
| 51   | 1287.112 | 239.427   | 52   | 1290.319 | 270.243   | 53   | 1292.209 | 247.257   | 54   | 1306.717 | 1882.377  |      |          |           |

### Calculated Masses:

GICVAEPYEIR 3: Carbamidomethyl (C)

| N-Term. | Ion | a        | a-17     | a-18     | b        | b-17     | b-18     | b+18     | c        | i       | x        | y        | z        | C-Term. | Ion |
|---------|-----|----------|----------|----------|----------|----------|----------|----------|----------|---------|----------|----------|----------|---------|-----|
| 1       | G   | 30.034   | 13.007   | 12.023   | 58.029   | 41.002   | 40.018   | 76.039   | 75.055   | 30.034  | 201.098  | 175.119  | 158.092  | 11      | R   |
| 2       | I   | 143.118  | 126.091  | 125.107  | 171.113  | 154.086  | 153.102  | 189.123  | 188.139  | 86.096  | 314.182  | 288.203  | 271.176  | 10      | I   |
| 3       | C*  | 303.149  | 286.122  | 285.138  | 331.143  | 314.117  | 313.133  | 349.154  | 348.170  | 133.043 | 443.225  | 417.246  | 400.219  | 9       | E   |
| 4       | V   | 402.217  | 385.190  | 384.206  | 430.212  | 413.185  | 412.201  | 448.222  | 447.238  | 72.081  | 606.288  | 580.309  | 563.282  | 8       | Y   |
| 5       | A   | 473.254  | 456.228  | 455.243  | 501.249  | 484.222  | 483.238  | 519.260  | 518.276  | 44.049  | 703.341  | 677.362  | 660.335  | 7       | P   |
| 6       | E   | 602.297  | 585.270  | 584.286  | 630.292  | 613.265  | 612.281  | 648.302  | 647.318  | 102.055 | 832.384  | 806.404  | 789.378  | 6       | E   |
| 7       | P   | 699.349  | 682.323  | 681.339  | 727.344  | 710.318  | 709.334  | 745.355  | 744.371  | 70.065  | 903.421  | 877.441  | 860.415  | 5       | A   |
| 8       | Y   | 862.413  | 845.386  | 844.402  | 890.408  | 873.381  | 872.397  | 908.418  | 907.434  | 136.076 | 1002.489 | 976.510  | 959.483  | 4       | V   |
| 9       | E   | 991.455  | 974.429  | 973.445  | 1019.450 | 1002.424 | 1001.440 | 1037.461 | 1036.477 | 102.055 | 1162.520 | 1136.540 | 1119.514 | 3       | C*  |
| 10      | I   | 1104.539 | 1087.513 | 1086.529 | 1132.534 | 1115.508 | 1114.524 | 1150.545 | 1149.561 | 86.096  | 1275.604 | 1249.625 | 1232.598 | 2       | I   |
| 11      | R   | 1260.641 | 1243.614 | 1242.630 | 1288.635 | 1271.609 | 1270.625 | 1306.646 | 1305.662 | 129.113 | 1332.625 | 1306.646 | 1289.619 | 1       | G   |

## CVF parentmass 1337.885

## Spectrum Analysis Report

|                  |          |                   |          |                     |       |                  |          |
|------------------|----------|-------------------|----------|---------------------|-------|------------------|----------|
| Sequence Name:   |          | Parentmass:       | 1337.885 | Mass Error:         | 0.236 | MH+ (mono):      | 1337.649 |
| MH+ (avg):       | 1338.447 | Threshold (a.i.): | 0.000    | Tolerance (Da):     | 0.700 | Number of Peaks: | 73       |
| Above Threshold: | 73       | Assigned Peaks:   | 38       | Not assigned Peaks: | 35    |                  |          |

Abs. Int. \* 1000

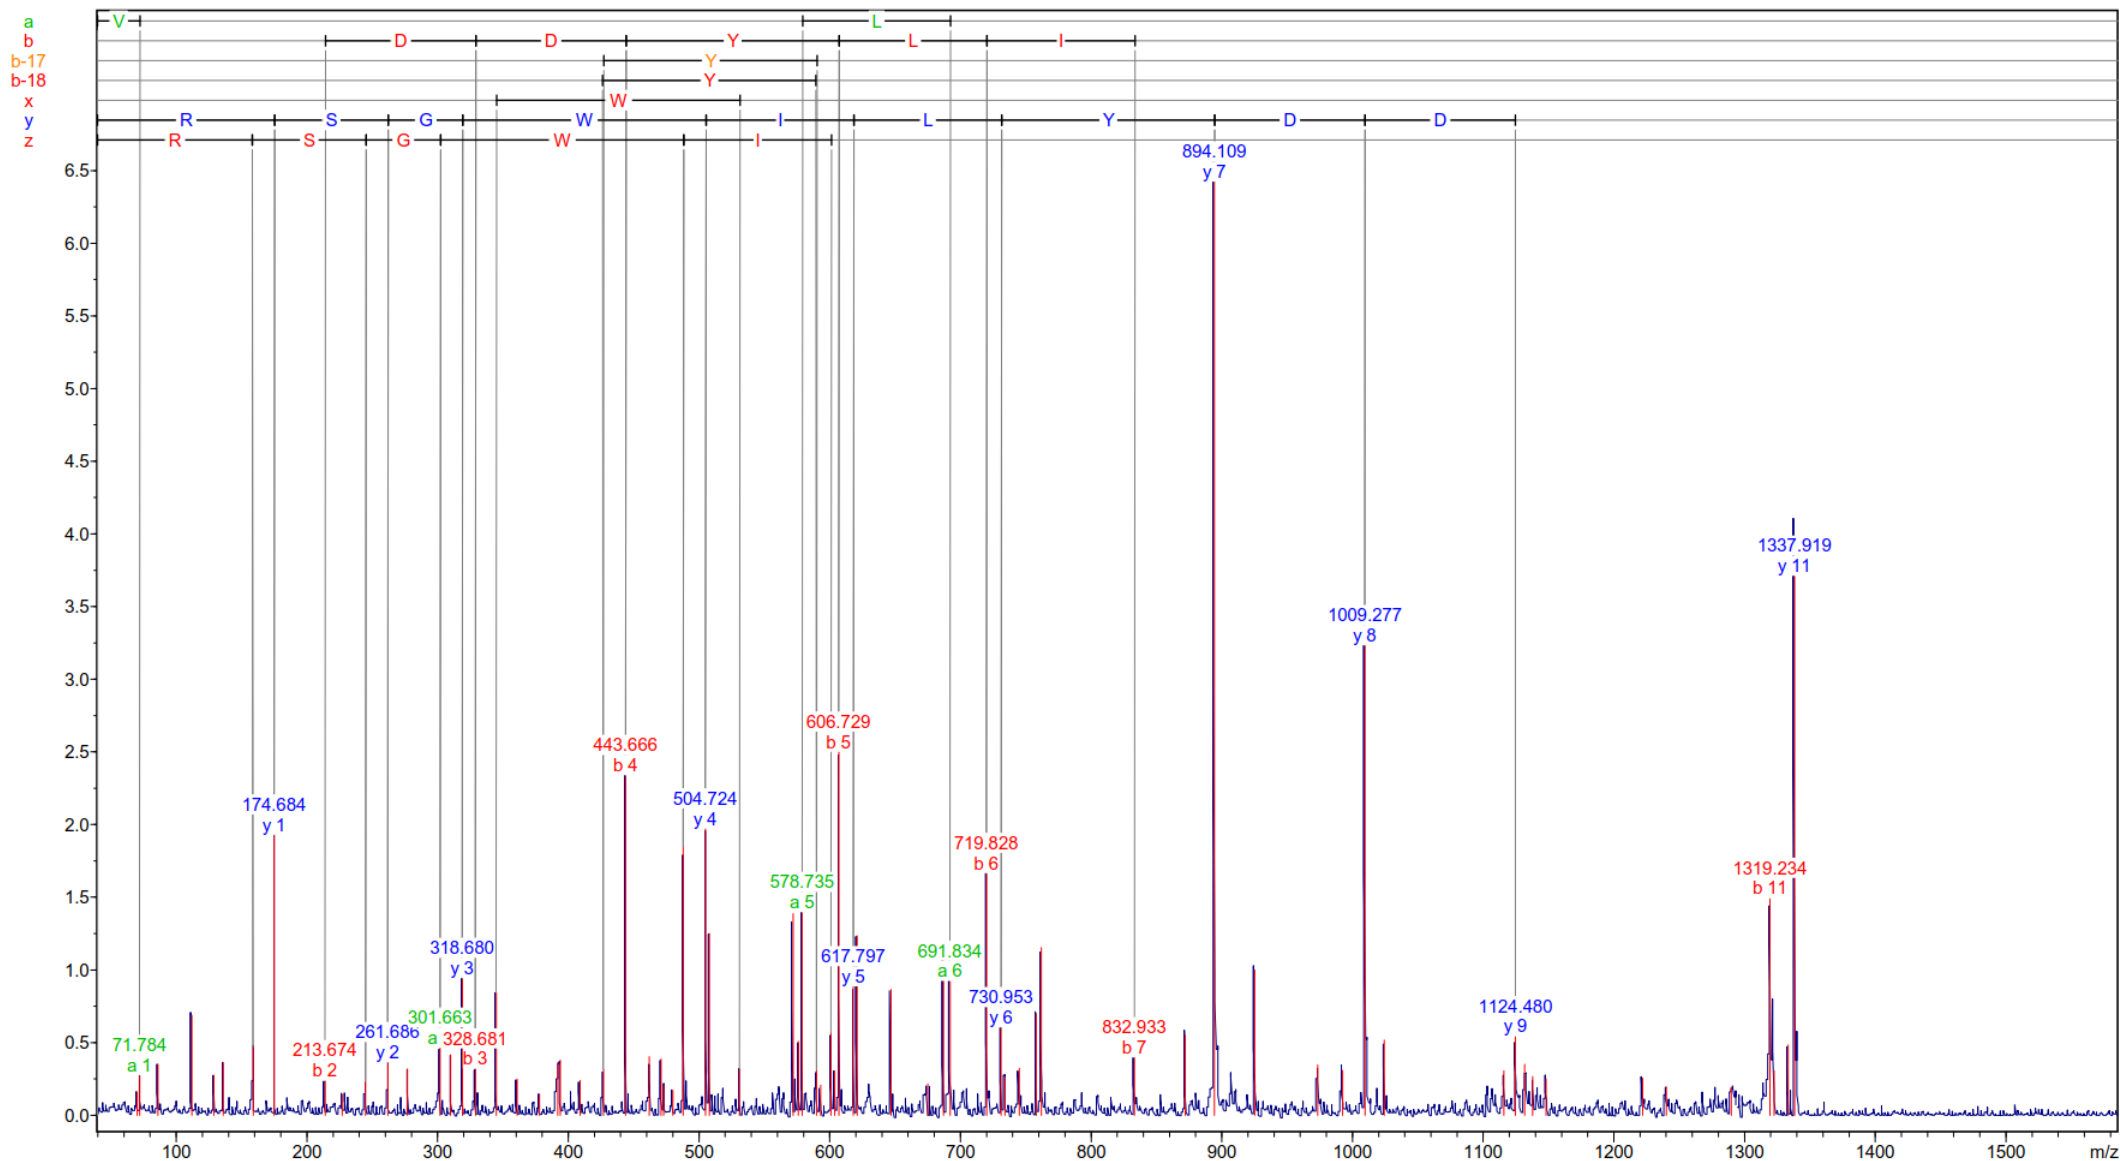

## Spectrum Analysis Report

### Display Parameter:

|                   |          |                     |       |                  |          |                  |          |
|-------------------|----------|---------------------|-------|------------------|----------|------------------|----------|
| Parentmass:       | 1337.885 | Mass Error:         | 0.236 | MH+ (mono):      | 1337.649 | MH+ (avg):       | 1338.447 |
| Threshold (a.i.): | 0.000    | Tolerance (Da):     | 0.700 | Number of Peaks: | 73       | Above Threshold: | 73       |
| Assigned Peaks:   | 38       | Not assigned Peaks: | 35    |                  |          |                  |          |

### Peaklist:

| Peak | Mass     | Intensity |
|------|----------|-----------|------|----------|-----------|------|----------|-----------|------|----------|-----------|------|----------|-----------|
| 1    | 69.764   | 160.824   | 2    | 71.784   | 276.462   | 3    | 85.766   | 351.548   | 4    | 111.719  | 688.551   | 5    | 128.713  | 275.981   |
| 6    | 135.681  | 361.804   | 7    | 158.674  | 469.052   | 8    | 174.684  | 1928.457  | 9    | 213.674  | 237.133   | 10   | 226.715  | 146.800   |
| 11   | 244.687  | 238.448   | 12   | 261.686  | 364.212   | 13   | 276.688  | 320.419   | 14   | 301.663  | 462.933   | 15   | 309.693  | 416.788   |
| 16   | 318.680  | 942.011   | 17   | 328.681  | 318.597   | 18   | 344.627  | 844.128   | 19   | 360.627  | 250.975   | 20   | 377.651  | 146.047   |
| 21   | 391.678  | 354.628   | 22   | 393.650  | 380.336   | 23   | 408.705  | 241.460   | 24   | 426.646  | 312.853   | 25   | 443.666  | 2339.231  |
| 26   | 461.653  | 403.668   | 27   | 470.708  | 388.833   | 28   | 472.720  | 206.251   | 29   | 479.698  | 173.258   | 30   | 487.701  | 1846.968  |
| 31   | 504.724  | 1971.230  | 32   | 507.661  | 1250.713  | 33   | 530.675  | 317.182   | 34   | 571.769  | 1388.735  | 35   | 575.733  | 509.761   |
| 36   | 578.735  | 1397.262  | 37   | 589.708  | 312.910   | 38   | 592.737  | 208.423   | 39   | 600.761  | 568.927   | 40   | 603.710  | 307.778   |
| 41   | 606.729  | 2499.765  | 42   | 617.797  | 884.954   | 43   | 620.732  | 1237.165  | 44   | 646.698  | 865.970   | 45   | 674.806  | 217.057   |
| 46   | 686.796  | 1101.252  | 47   | 691.834  | 922.095   | 48   | 719.828  | 1663.989  | 49   | 730.953  | 604.470   | 50   | 733.799  | 261.022   |
| 51   | 744.779  | 325.205   | 52   | 757.865  | 701.665   | 53   | 761.768  | 1155.767  | 54   | 832.933  | 397.320   | 55   | 871.941  | 553.332   |
| 56   | 894.109  | 6423.685  | 57   | 924.904  | 1000.550  | 58   | 973.033  | 345.723   | 59   | 992.222  | 308.447   | 60   | 1009.277 | 3233.435  |
| 61   | 1023.991 | 518.685   | 62   | 1115.472 | 306.620   | 63   | 1124.480 | 542.089   | 64   | 1131.593 | 351.961   | 65   | 1137.606 | 267.320   |
| 66   | 1147.951 | 249.415   | 67   | 1221.699 | 256.272   | 68   | 1239.782 | 196.824   | 69   | 1289.530 | 193.108   | 70   | 1319.234 | 1492.658  |
| 71   | 1322.359 | 306.328   | 72   | 1333.248 | 484.871   | 73   | 1337.919 | 3711.113  |      |          |           |      |          |           |

### Calculated Masses:

VNDDYLIWGSR

| N-Term. | Ion | a              | a-17           | a-18           | b               | b-17           | b-18           | b+18            | c              | i              | x              | y               | z               | C-Term. | Ion |
|---------|-----|----------------|----------------|----------------|-----------------|----------------|----------------|-----------------|----------------|----------------|----------------|-----------------|-----------------|---------|-----|
| 1       | V   | <b>72.081</b>  | 55.054         | 54.070         | 100.076         | 83.049         | 82.065         | 118.086         | 117.102        | <b>72.081</b>  | 201.098        | <b>175.119</b>  | <b>158.092</b>  | 11      | R   |
| 2       | N   | 186.124        | 169.097        | 168.113        | <b>214.119</b>  | 197.092        | 196.108        | 232.129         | 231.145        | 87.055         | 288.130        | <b>262.151</b>  | <b>245.124</b>  | 10      | S   |
| 3       | D   | <b>301.151</b> | 284.124        | 283.140        | <b>329.146</b>  | 312.119        | 311.135        | 347.156         | 346.172        | 88.039         | <b>345.152</b> | <b>319.172</b>  | <b>302.146</b>  | 9       | G   |
| 4       | D   | 416.178        | 399.151        | 398.167        | <b>444.173</b>  | <b>427.146</b> | <b>426.162</b> | <b>462.183</b>  | <b>461.199</b> | 88.039         | <b>531.231</b> | <b>505.252</b>  | <b>488.225</b>  | 8       | W   |
| 5       | Y   | <b>579.241</b> | 562.214        | 561.230        | <b>607.236</b>  | <b>590.209</b> | <b>589.225</b> | 625.246         | 624.262        | <b>136.076</b> | 644.315        | <b>618.336</b>  | <b>601.309</b>  | 7       | I   |
| 6       | L   | <b>692.325</b> | <b>675.298</b> | <b>674.314</b> | <b>720.320</b>  | 703.293        | 702.309        | 738.330         | 737.346        | <b>86.096</b>  | <b>757.399</b> | <b>731.420</b>  | 714.393         | 6       | L   |
| 7       | I   | 805.409        | 788.382        | 787.398        | <b>833.404</b>  | 816.377        | 815.393        | 851.415         | 850.431        | <b>86.096</b>  | 920.462        | <b>894.483</b>  | 877.457         | 5       | Y   |
| 8       | W   | 991.488        | 974.462        | <b>973.478</b> | 1019.483        | 1002.457       | 1001.473       | 1037.494        | 1036.510       | <b>159.092</b> | 1035.489       | <b>1009.510</b> | <b>992.484</b>  | 4       | D   |
| 9       | G   | 1048.510       | 1031.483       | 1030.499       | 1076.505        | 1059.478       | 1058.494       | 1094.515        | 1093.531       | 30.034         | 1150.516       | <b>1124.537</b> | 1107.511        | 3       | D   |
| 10      | S   | 1135.542       | 1118.515       | 1117.531       | 1163.537        | 1146.510       | 1145.526       | 1181.547        | 1180.563       | 60.044         | 1264.559       | 1238.580        | <b>1221.553</b> | 2       | N   |
| 11      | R   | 1291.643       | 1274.616       | 1273.632       | <b>1319.638</b> | 1302.611       | 1301.627       | <b>1337.648</b> | 1336.664       | <b>129.113</b> | 1363.628       | <b>1337.648</b> | 1320.622        | 1       | V   |

# PLA<sub>2</sub> parentmass 1769.783

## Spectrum Analysis Report

|                  |                   |          |                     |       |                  |          |
|------------------|-------------------|----------|---------------------|-------|------------------|----------|
| Sequence Name:   | Parentmass:       | 1769.783 | Mass Error:         | 0.115 | MH+ (mono):      | 1769.668 |
| MH+ (avg):       | Threshold (a.i.): | 0.000    | Tolerance (Da):     | 0.700 | Number of Peaks: | 83       |
| Above Threshold: | Assigned Peaks:   | 52       | Not assigned Peaks: | 31    |                  |          |

Abs. Int. \* 1000

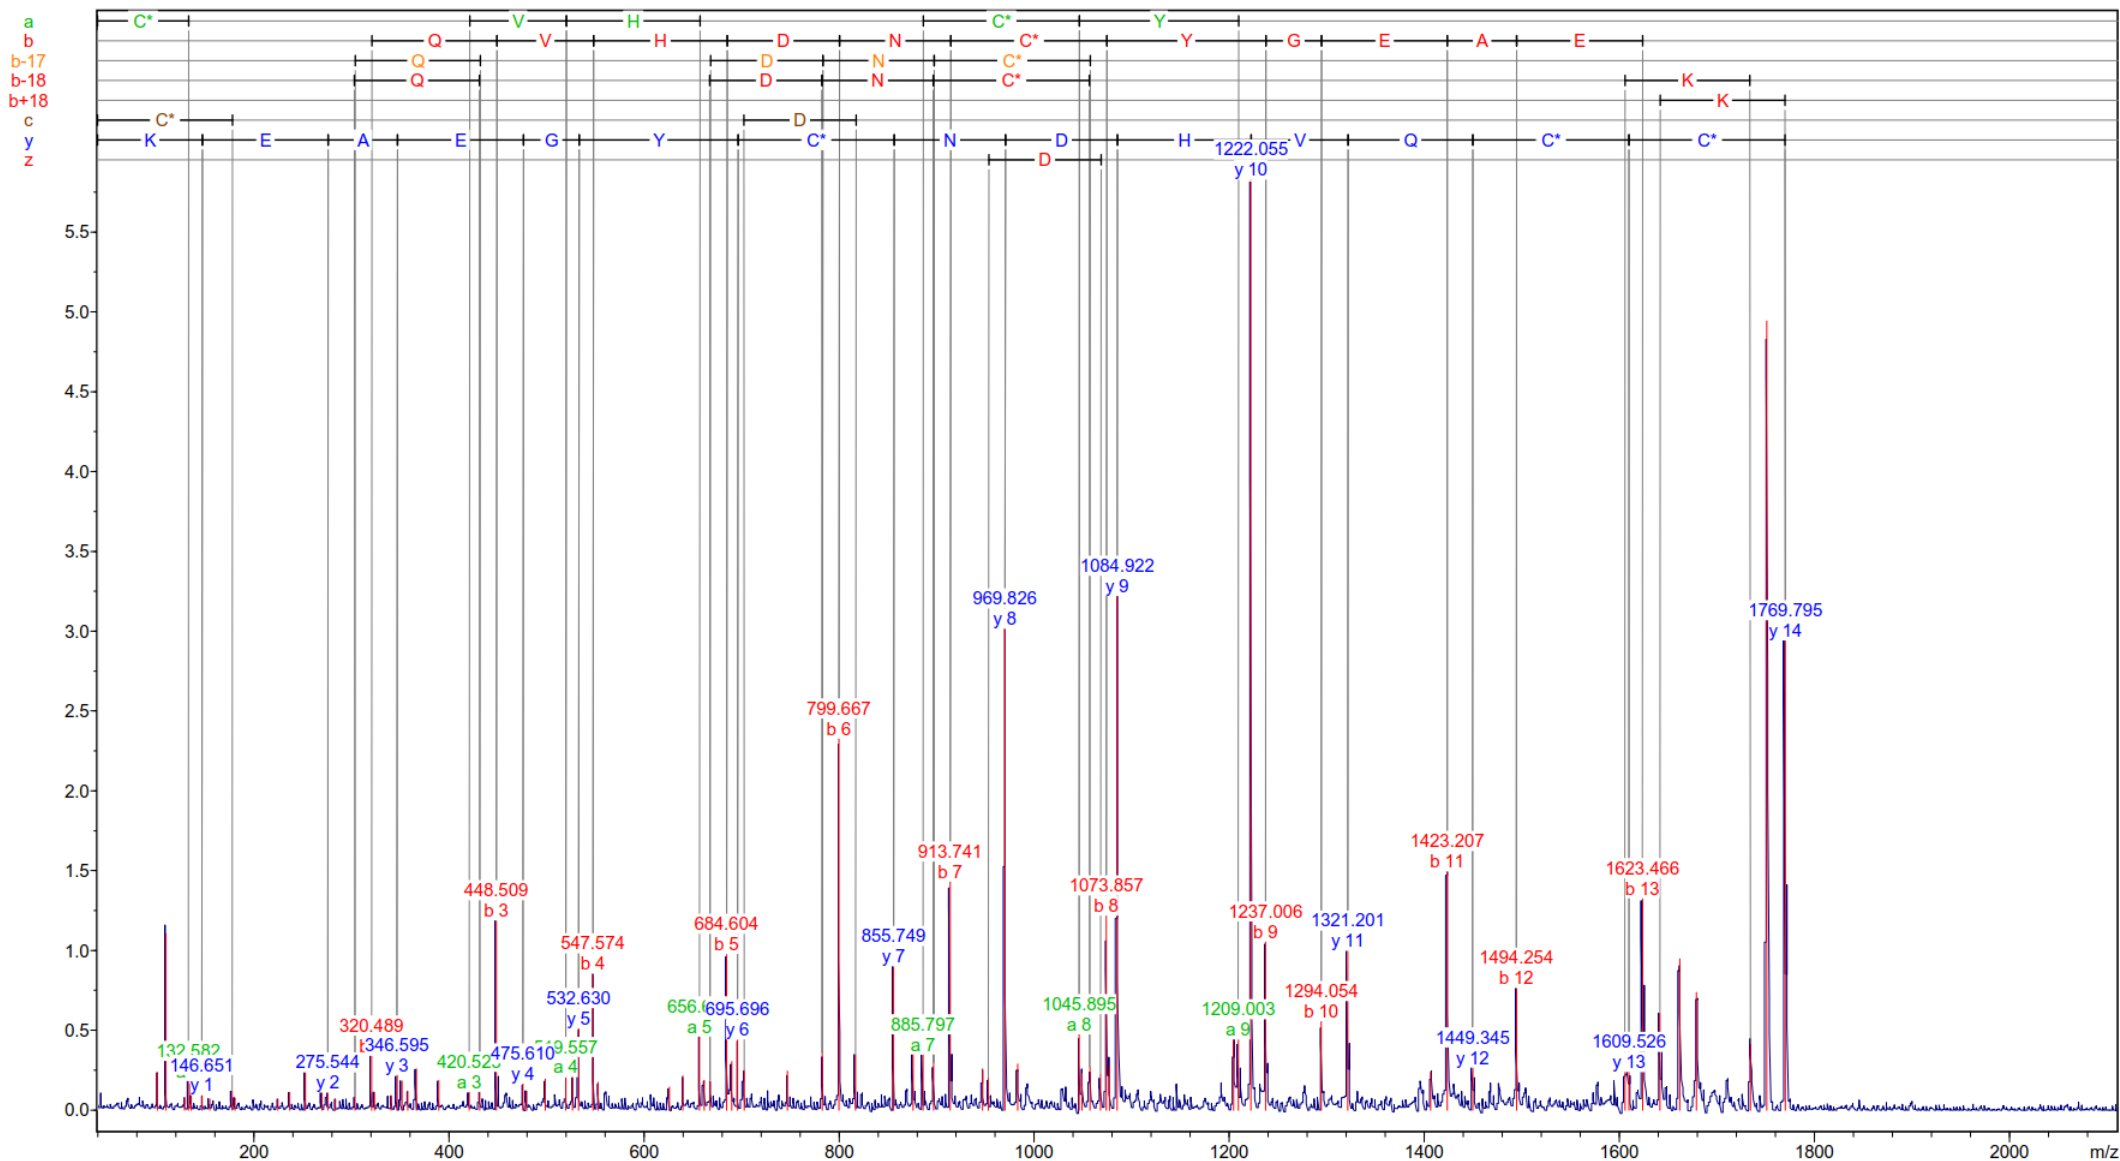

## Spectrum Analysis Report

### Display Parameter:

|                   |          |                     |       |                  |          |                  |          |
|-------------------|----------|---------------------|-------|------------------|----------|------------------|----------|
| Parentmass:       | 1769.783 | Mass Error:         | 0.115 | MH+ (mono):      | 1769.668 | MH+ (avg):       | 1770.905 |
| Threshold (a.i.): | 0.000    | Tolerance (Da):     | 0.700 | Number of Peaks: | 83       | Above Threshold: | 83       |
| Assigned Peaks:   | 52       | Not assigned Peaks: | 31    |                  |          |                  |          |

### Peaklist:

| Peak | Mass     | Intensity |
|------|----------|-----------|------|----------|-----------|------|----------|-----------|------|----------|-----------|------|----------|-----------|
| 1    | 100.681  | 232.468   | 2    | 109.656  | 1106.932  | 3    | 128.642  | 81.998    | 4    | 132.582  | 180.801   | 5    | 135.631  | 160.462   |
| 6    | 146.651  | 92.332    | 7    | 154.558  | 70.854    | 8    | 177.564  | 118.912   | 9    | 180.592  | 77.091    | 10   | 224.513  | 69.341    |
| 11   | 236.581  | 113.322   | 12   | 252.530  | 243.712   | 13   | 269.547  | 136.192   | 14   | 275.544  | 108.761   | 15   | 283.565  | 68.378    |
| 16   | 303.461  | 83.065    | 17   | 320.489  | 338.996   | 18   | 323.524  | 111.259   | 19   | 340.496  | 93.539    | 20   | 346.595  | 219.136   |
| 21   | 351.588  | 184.065   | 22   | 357.534  | 118.762   | 23   | 366.533  | 260.188   | 24   | 389.499  | 187.833   | 25   | 420.523  | 112.422   |
| 26   | 431.486  | 212.358   | 27   | 448.509  | 1187.173  | 28   | 475.610  | 164.562   | 29   | 479.567  | 120.232   | 30   | 498.565  | 195.233   |
| 31   | 519.557  | 204.342   | 32   | 526.540  | 456.405   | 33   | 532.630  | 511.762   | 34   | 547.574  | 853.874   | 35   | 552.570  | 175.247   |
| 36   | 625.635  | 146.286   | 37   | 639.563  | 216.157   | 38   | 656.621  | 459.550   | 39   | 661.663  | 187.176   | 40   | 667.595  | 183.836   |
| 41   | 684.604  | 976.520   | 42   | 689.611  | 305.177   | 43   | 695.696  | 441.188   | 44   | 702.650  | 251.921   | 45   | 746.638  | 244.704   |
| 46   | 782.683  | 358.484   | 47   | 799.667  | 2325.365  | 48   | 816.671  | 346.808   | 49   | 855.749  | 899.765   | 50   | 875.728  | 407.836   |
| 51   | 885.797  | 347.419   | 52   | 896.752  | 297.926   | 53   | 913.741  | 1429.767  | 54   | 946.793  | 260.340   | 55   | 952.805  | 201.734   |
| 56   | 969.826  | 3015.791  | 57   | 982.814  | 289.596   | 58   | 1045.895 | 473.959   | 59   | 1048.774 | 230.208   | 60   | 1056.818 | 269.611   |
| 61   | 1067.851 | 223.229   | 62   | 1073.857 | 1217.148  | 63   | 1076.852 | 278.326   | 64   | 1084.922 | 3219.069  | 65   | 1204.040 | 458.336   |
| 66   | 1209.003 | 441.341   | 67   | 1222.055 | 5827.663  | 68   | 1237.006 | 1055.519  | 69   | 1294.054 | 555.563   | 70   | 1321.201 | 996.642   |
| 71   | 1406.080 | 238.533   | 72   | 1423.207 | 1495.012  | 73   | 1449.345 | 265.680   | 74   | 1494.254 | 764.784   | 75   | 1605.431 | 252.666   |
| 76   | 1609.526 | 237.753   | 77   | 1623.466 | 1324.711  | 78   | 1641.434 | 606.253   | 79   | 1661.453 | 948.492   | 80   | 1678.618 | 737.853   |
| 81   | 1734.114 | 414.767   | 82   | 1750.930 | 4943.190  | 83   | 1769.795 | 2941.363  |      |          |           |      |          |           |

### Calculated Masses:

CCQVHDNICYGEAEK 1: Carbamidomethyl (C) 2: Carbamidomethyl (C) 8: Carbamidomethyl (C)

| N-Term. | Ion | a        | a-17     | a-18     | b        | b-17     | b-18     | b+18     | c        | i       | x        | y        | z        | C-Term. | Ion |
|---------|-----|----------|----------|----------|----------|----------|----------|----------|----------|---------|----------|----------|----------|---------|-----|
| 1       | C*  | 133.043  | 116.016  | 115.032  | 161.038  | 144.011  | 143.027  | 179.048  | 178.064  | 133.043 | 173.092  | 147.113  | 130.086  | 14      | K   |
| 2       | C*  | 293.074  | 276.047  | 275.063  | 321.069  | 304.042  | 303.058  | 339.079  | 338.095  | 133.043 | 302.135  | 276.155  | 259.129  | 13      | E   |
| 3       | Q   | 421.132  | 404.106  | 403.122  | 449.127  | 432.101  | 431.117  | 467.138  | 466.154  | 101.071 | 373.172  | 347.193  | 330.166  | 12      | A   |
| 4       | V   | 520.201  | 503.174  | 502.190  | 548.196  | 531.169  | 530.185  | 566.206  | 565.222  | 72.081  | 502.214  | 476.235  | 459.209  | 11      | E   |
| 5       | H   | 657.260  | 640.233  | 639.249  | 685.254  | 668.228  | 667.244  | 703.265  | 702.281  | 110.071 | 559.236  | 533.257  | 516.230  | 10      | G   |
| 6       | D   | 772.287  | 755.260  | 754.276  | 800.281  | 783.255  | 782.271  | 818.292  | 817.308  | 88.039  | 722.299  | 696.320  | 679.293  | 9       | Y   |
| 7       | N   | 886.329  | 869.303  | 868.319  | 914.324  | 897.298  | 896.314  | 932.335  | 931.351  | 87.055  | 882.330  | 856.351  | 839.324  | 8       | C*  |
| 8       | C*  | 1046.360 | 1029.334 | 1028.350 | 1074.355 | 1057.328 | 1056.344 | 1092.366 | 1091.382 | 133.043 | 996.373  | 970.393  | 953.367  | 7       | N   |
| 9       | Y   | 1209.423 | 1192.397 | 1191.413 | 1237.418 | 1220.392 | 1219.408 | 1255.429 | 1254.445 | 136.076 | 1111.400 | 1085.420 | 1068.394 | 6       | D   |
| 10      | G   | 1266.445 | 1249.418 | 1248.434 | 1294.440 | 1277.413 | 1276.429 | 1312.450 | 1311.466 | 30.034  | 1248.459 | 1222.479 | 1205.453 | 5       | H   |
| 11      | E   | 1395.487 | 1378.461 | 1377.477 | 1423.482 | 1406.456 | 1405.472 | 1441.493 | 1440.509 | 102.055 | 1347.527 | 1321.548 | 1304.521 | 4       | V   |
| 12      | A   | 1466.525 | 1449.498 | 1448.514 | 1494.519 | 1477.493 | 1476.509 | 1512.530 | 1511.546 | 44.049  | 1475.586 | 1449.606 | 1432.580 | 3       | Q   |
| 13      | E   | 1595.567 | 1578.541 | 1577.557 | 1623.562 | 1606.536 | 1605.552 | 1641.573 | 1640.589 | 102.055 | 1635.616 | 1609.637 | 1592.610 | 2       | C*  |
| 14      | K   | 1723.662 | 1706.636 | 1705.652 | 1751.657 | 1734.630 | 1733.646 | 1769.668 | 1768.684 | 101.107 | 1795.647 | 1769.668 | 1752.641 | 1       | C*  |

PLA<sub>2</sub> parentmass 987.215

## Spectrum Analysis Report

|                  |         |                   |         |                     |       |                  |         |
|------------------|---------|-------------------|---------|---------------------|-------|------------------|---------|
| Sequence Name:   |         | Parentmass:       | 987.512 | Mass Error:         | 0.037 | MH+ (mono):      | 987.475 |
| MH+ (avg):       | 988.032 | Threshold (a.i.): | 0.000   | Tolerance (Da):     | 0.700 | Number of Peaks: | 39      |
| Above Threshold: | 39      | Assigned Peaks:   | 22      | Not assigned Peaks: | 17    |                  |         |

Abs. Int. \* 1000

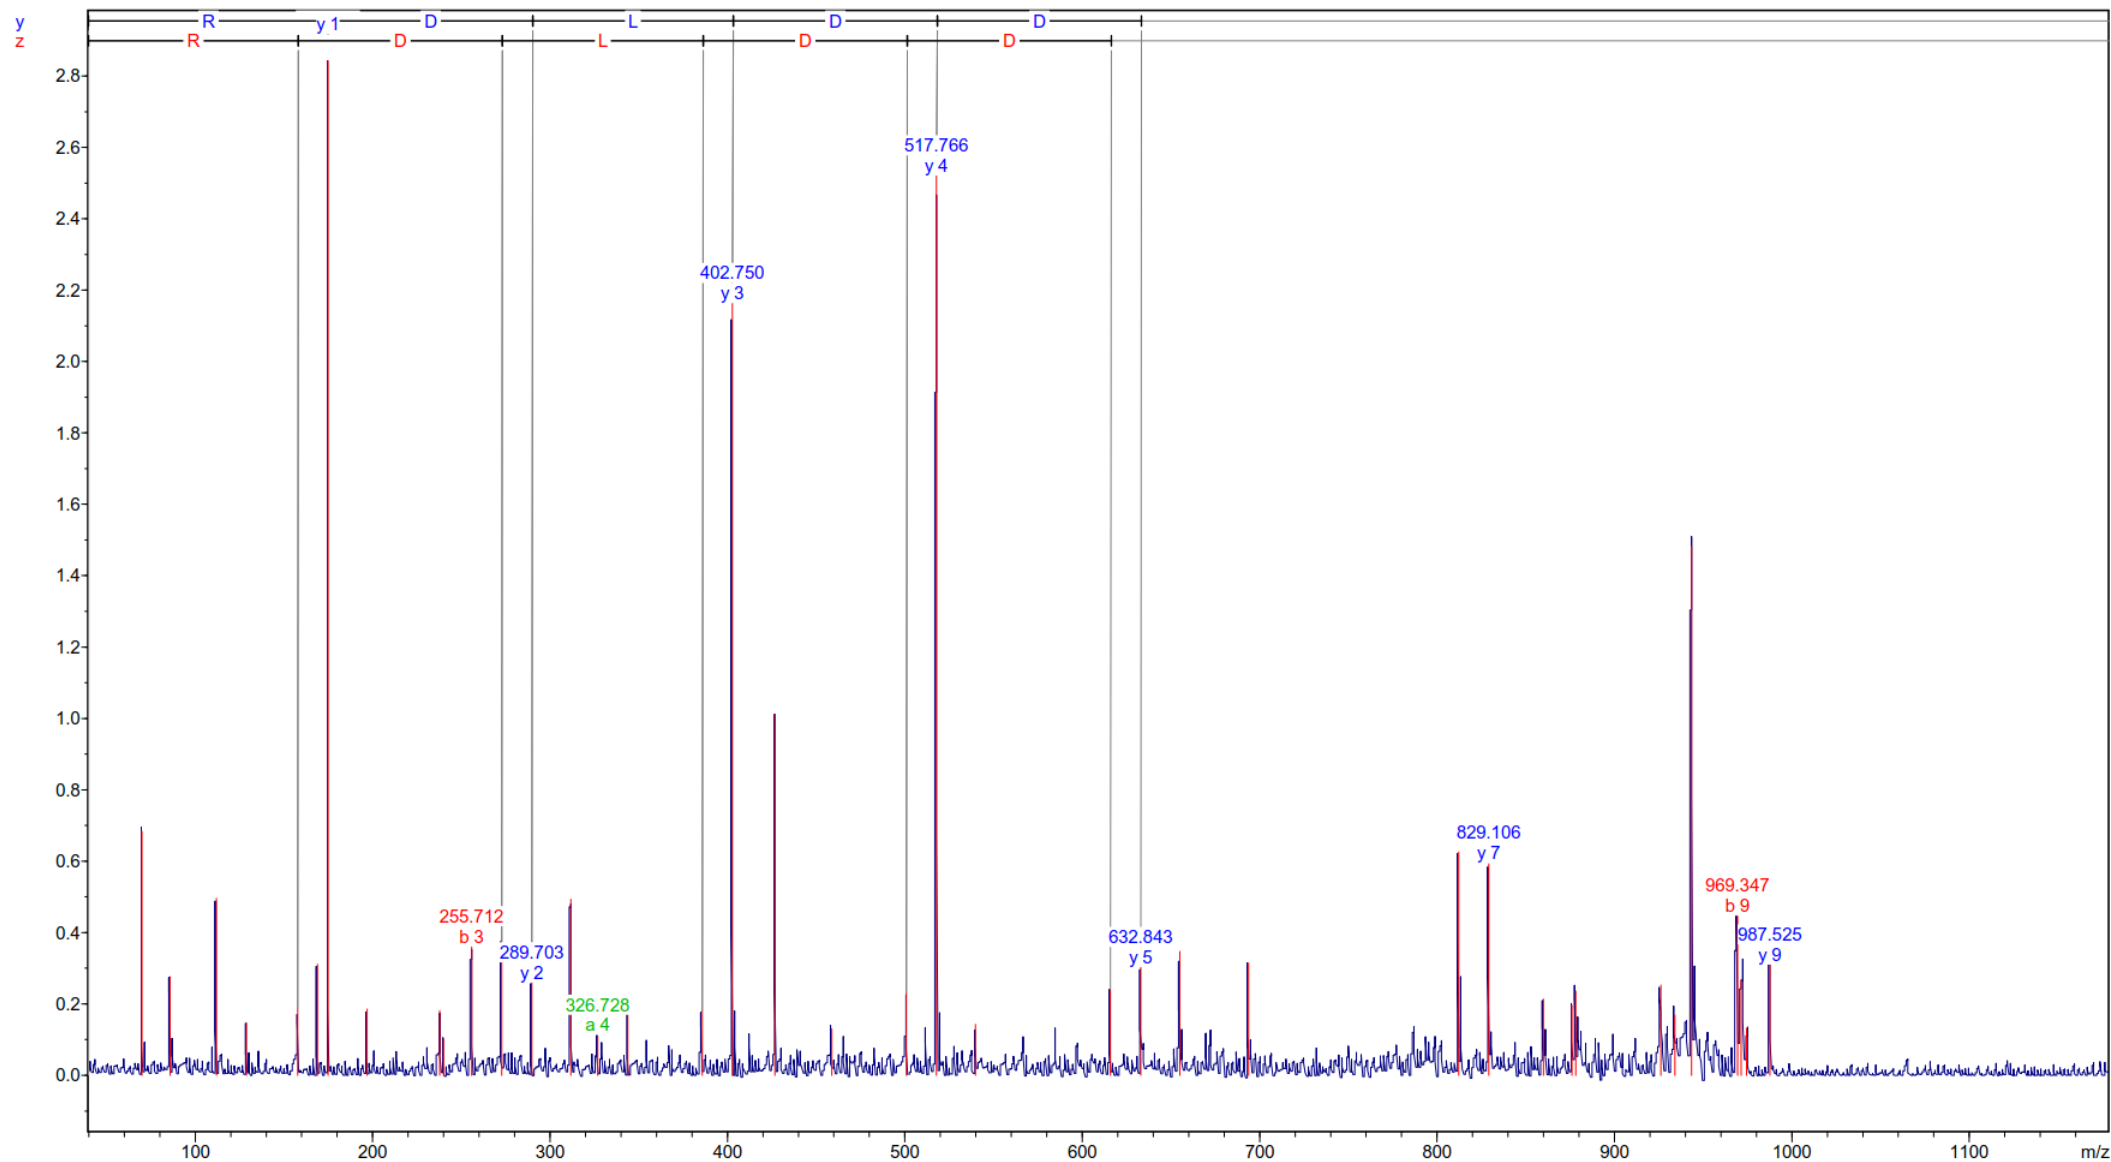

## Spectrum Analysis Report

### Display Parameter:

|                         |                        |                     |
|-------------------------|------------------------|---------------------|
| Parentmass: 987.512     | Mass Error: 0.037      | MH+ (mono): 987.475 |
| Threshold (a.i.): 0.000 | Tolerance (Da): 0.700  | MH+ (avg): 988.032  |
| Assigned Peaks: 22      | Not assigned Peaks: 17 | Above Threshold: 39 |

### Peaklist:

| Peak | Mass    | Intensity |
|------|---------|-----------|------|---------|-----------|------|---------|-----------|------|---------|-----------|------|---------|-----------|
| 1    | 69.815  | 684.018   | 2    | 85.816  | 276.200   | 3    | 111.787 | 496.274   | 4    | 128.785 | 147.039   | 5    | 157.729 | 186.200   |
| 6    | 168.764 | 311.441   | 7    | 174.752 | 2917.397  | 8    | 196.754 | 185.603   | 9    | 237.711 | 181.185   | 10   | 239.784 | 102.448   |
| 11   | 255.712 | 360.695   | 12   | 272.689 | 376.817   | 13   | 289.703 | 259.730   | 14   | 311.710 | 493.123   | 15   | 326.728 | 112.906   |
| 16   | 343.674 | 177.824   | 17   | 385.730 | 181.966   | 18   | 402.750 | 2163.096  | 19   | 426.711 | 1012.215  | 20   | 458.746 | 130.883   |
| 21   | 500.747 | 231.899   | 22   | 517.766 | 2520.476  | 23   | 539.767 | 142.588   | 24   | 615.778 | 239.983   | 25   | 632.843 | 302.546   |
| 26   | 654.849 | 346.987   | 27   | 693.579 | 314.779   | 28   | 812.054 | 626.531   | 29   | 829.106 | 593.658   | 30   | 859.892 | 214.106   |
| 31   | 875.982 | 195.875   | 32   | 878.122 | 236.187   | 33   | 925.982 | 253.193   | 34   | 933.894 | 169.089   | 35   | 943.332 | 1482.883  |
| 36   | 969.347 | 447.133   | 37   | 971.336 | 267.551   | 38   | 974.390 | 131.049   | 39   | 987.525 | 310.009   |      |         |           |

### Calculated Masses:

GTPVDDLDR

| N-Term. | Ion | a       | a-17    | a-18    | b       | b-17    | b-18    | b+18    | c       | i       | x        | y       | z       | C-Term. | Ion |
|---------|-----|---------|---------|---------|---------|---------|---------|---------|---------|---------|----------|---------|---------|---------|-----|
| 1       | G   | 30.034  | 13.007  | 12.023  | 58.029  | 41.002  | 40.018  | 76.039  | 75.055  | 30.034  | 201.098  | 175.119 | 158.092 | 9       | R   |
| 2       | T   | 131.082 | 114.055 | 113.071 | 159.076 | 142.050 | 141.066 | 177.087 | 176.103 | 74.060  | 316.125  | 290.146 | 273.119 | 8       | D   |
| 3       | P   | 228.134 | 211.108 | 210.124 | 256.129 | 239.103 | 238.119 | 274.140 | 273.156 | 70.065  | 429.209  | 403.230 | 386.203 | 7       | L   |
| 4       | V   | 327.203 | 310.176 | 309.192 | 355.198 | 338.171 | 337.187 | 373.208 | 372.224 | 72.081  | 544.236  | 518.257 | 501.230 | 6       | D   |
| 5       | D   | 442.230 | 425.203 | 424.219 | 470.225 | 453.198 | 452.214 | 488.235 | 487.251 | 88.039  | 659.263  | 633.284 | 616.257 | 5       | D   |
| 6       | D   | 557.257 | 540.230 | 539.246 | 585.251 | 568.225 | 567.241 | 603.262 | 602.278 | 88.039  | 758.332  | 732.352 | 715.326 | 4       | V   |
| 7       | L   | 670.341 | 653.314 | 652.330 | 698.336 | 681.309 | 680.325 | 716.346 | 715.362 | 86.096  | 855.384  | 829.405 | 812.378 | 3       | P   |
| 8       | D   | 785.368 | 768.341 | 767.357 | 813.362 | 796.336 | 795.352 | 831.373 | 830.389 | 88.039  | 956.432  | 930.453 | 913.426 | 2       | T   |
| 9       | R   | 941.469 | 924.442 | 923.458 | 969.464 | 952.437 | 951.453 | 987.474 | 986.490 | 129.113 | 1013.453 | 987.474 | 970.448 | 1       | G   |

PLA<sub>2</sub> parentmass 1413.809

## Spectrum Analysis Report

|                  |          |                   |          |                     |       |                  |          |
|------------------|----------|-------------------|----------|---------------------|-------|------------------|----------|
| Sequence Name:   |          | Parentmass:       | 1413.809 | Mass Error:         | 0.085 | MH+ (mono):      | 1413.724 |
| MH+ (avg):       | 1414.694 | Threshold (a.i.): | 0.000    | Tolerance (Da):     | 0.700 | Number of Peaks: | 75       |
| Above Threshold: | 75       | Assigned Peaks:   | 35       | Not assigned Peaks: | 40    |                  |          |

Abs. Int. \* 1000

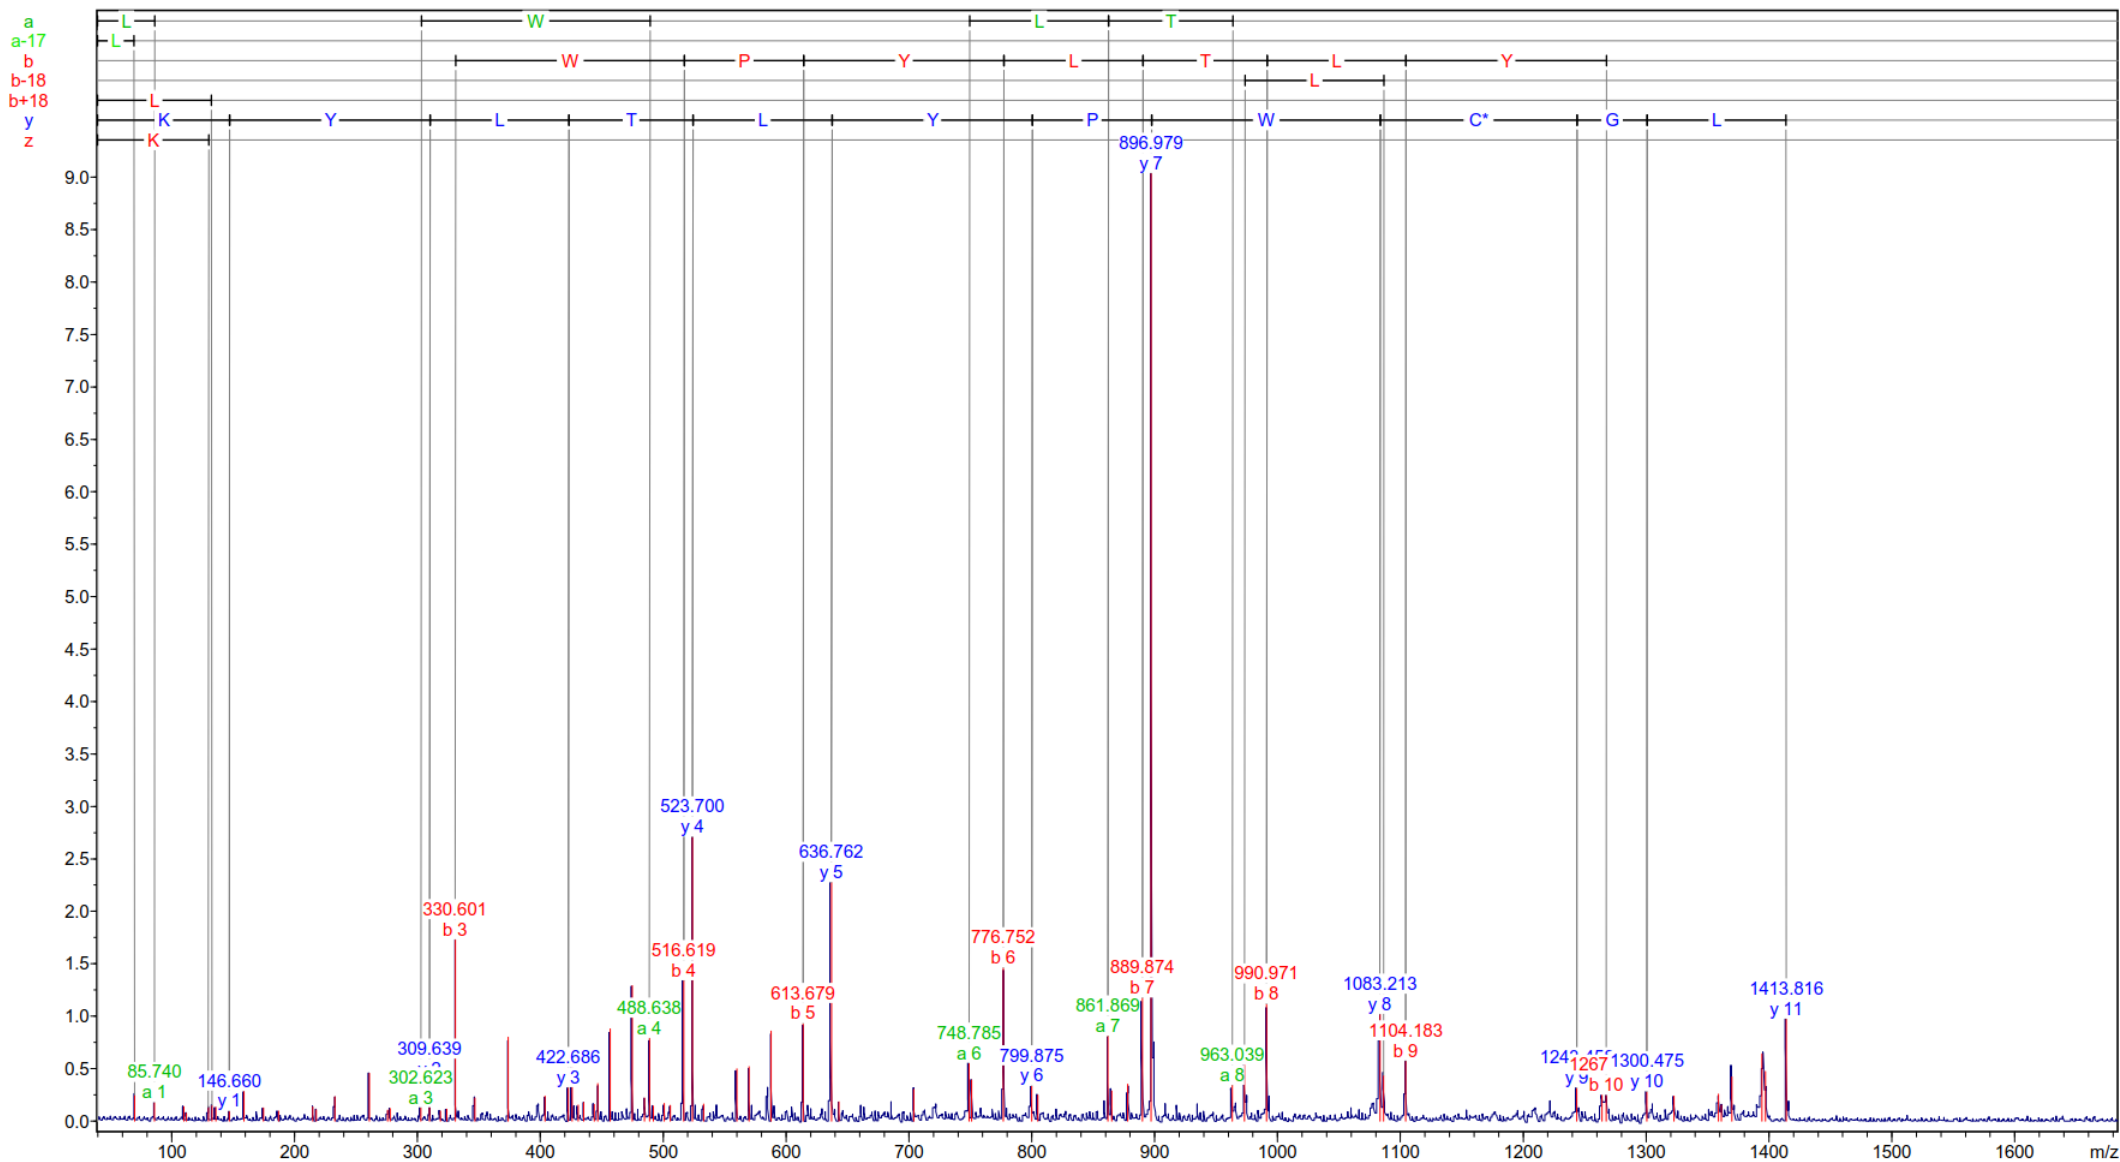

## Spectrum Analysis Report

### Display Parameter:

|                   |          |                     |       |                  |          |                  |          |
|-------------------|----------|---------------------|-------|------------------|----------|------------------|----------|
| Parentmass:       | 1413.809 | Mass Error:         | 0.085 | MH+ (mono):      | 1413.724 | MH+ (avg):       | 1414.694 |
| Threshold (a.i.): | 0.000    | Tolerance (Da):     | 0.700 | Number of Peaks: | 75       | Above Threshold: | 75       |
| Assigned Peaks:   | 35       | Not assigned Peaks: | 40    |                  |          |                  |          |

### Peaklist:

| Peak | Mass     | Intensity |
|------|----------|-----------|------|----------|-----------|------|----------|-----------|------|----------|-----------|------|----------|-----------|
| 1    | 69.758   | 247.753   | 2    | 85.740   | 177.976   | 3    | 109.648  | 137.782   | 4    | 111.690  | 75.706    | 5    | 129.641  | 128.878   |
| 6    | 132.619  | 148.228   | 7    | 135.674  | 132.535   | 8    | 146.660  | 96.296    | 9    | 158.636  | 281.873   | 10   | 174.657  | 125.238   |
| 11   | 186.696  | 95.610    | 12   | 214.636  | 136.785   | 13   | 217.547  | 109.615   | 14   | 232.622  | 233.519   | 15   | 260.603  | 457.549   |
| 16   | 275.650  | 104.526   | 17   | 277.638  | 120.298   | 18   | 302.623  | 130.012   | 19   | 309.639  | 401.859   | 20   | 318.582  | 95.227    |
| 21   | 323.606  | 113.829   | 22   | 330.601  | 1731.837  | 23   | 346.575  | 219.987   | 24   | 373.659  | 800.568   | 25   | 403.569  | 238.062   |
| 26   | 422.686  | 321.984   | 27   | 425.627  | 613.133   | 28   | 430.668  | 155.141   | 29   | 435.077  | 178.192   | 30   | 443.622  | 160.681   |
| 31   | 446.631  | 359.841   | 32   | 456.670  | 879.576   | 33   | 474.651  | 1291.454  | 34   | 484.637  | 222.401   | 35   | 488.638  | 790.025   |
| 36   | 491.777  | 145.509   | 37   | 500.612  | 169.114   | 38   | 505.657  | 149.622   | 39   | 516.619  | 1341.554  | 40   | 523.700  | 2711.543  |
| 41   | 532.625  | 162.327   | 42   | 559.715  | 498.136   | 43   | 569.726  | 519.855   | 44   | 587.719  | 858.044   | 45   | 613.679  | 930.597   |
| 46   | 636.762  | 2277.969  | 47   | 642.742  | 183.231   | 48   | 703.733  | 302.860   | 49   | 748.785  | 554.206   | 50   | 750.787  | 391.865   |
| 51   | 776.752  | 1461.591  | 52   | 799.875  | 336.387   | 53   | 804.795  | 247.180   | 54   | 861.869  | 812.879   | 55   | 864.843  | 287.027   |
| 56   | 877.791  | 352.371   | 57   | 889.874  | 1175.709  | 58   | 896.979  | 9038.926  | 59   | 963.039  | 342.590   | 60   | 972.964  | 701.423   |
| 61   | 990.971  | 1117.577  | 62   | 1083.213 | 1019.549  | 63   | 1086.167 | 434.246   | 64   | 1104.183 | 574.337   | 65   | 1243.458 | 318.516   |
| 66   | 1263.864 | 312.134   | 67   | 1267.455 | 248.838   | 68   | 1300.475 | 281.605   | 69   | 1322.529 | 238.344   | 70   | 1358.782 | 258.993   |
| 71   | 1361.059 | 155.361   | 72   | 1369.696 | 421.836   | 73   | 1394.030 | 643.694   | 74   | 1397.100 | 475.142   | 75   | 1413.816 | 973.763   |

### Calculated Masses:

LGCWPYLTLYK 3: Carbamidomethyl (C)

| N-Term. | Ion | a              | a-17           | a-18     | b               | b-17           | b-18            | b+18            | c        | i              | x        | y               | z               | C-Term. | Ion |
|---------|-----|----------------|----------------|----------|-----------------|----------------|-----------------|-----------------|----------|----------------|----------|-----------------|-----------------|---------|-----|
| 1       | L   | <b>86.096</b>  | <b>69.070</b>  | 68.086   | 114.091         | 97.065         | 96.081          | <b>132.102</b>  | 131.118  | <b>86.096</b>  | 173.092  | <b>147.113</b>  | <b>130.086</b>  | 11      | K   |
| 2       | G   | 143.118        | 126.091        | 125.107  | 171.113         | 154.086        | 153.102         | 189.123         | 188.139  | 30.034         | 336.155  | <b>310.176</b>  | 293.150         | 10      | Y   |
| 3       | C*  | <b>303.149</b> | 286.122        | 285.138  | <b>331.143</b>  | 314.117        | 313.133         | 349.154         | 348.170  | <b>133.043</b> | 449.239  | <b>423.260</b>  | 406.234         | 9       | L   |
| 4       | W   | <b>489.228</b> | 472.201        | 471.217  | <b>517.223</b>  | <b>500.196</b> | 499.212         | 535.233         | 534.249  | <b>159.092</b> | 550.287  | <b>524.308</b>  | 507.281         | 8       | T   |
| 5       | P   | 586.281        | <b>569.254</b> | 568.270  | <b>614.276</b>  | 597.249        | 596.265         | 632.286         | 631.302  | <b>70.065</b>  | 663.371  | <b>637.392</b>  | 620.365         | 7       | L   |
| 6       | Y   | <b>749.344</b> | 732.317        | 731.333  | <b>777.339</b>  | 760.312        | 759.328         | 795.349         | 794.365  | <b>136.076</b> | 826.435  | <b>800.455</b>  | 783.429         | 6       | Y   |
| 7       | L   | <b>862.428</b> | 845.401        | 844.417  | <b>890.423</b>  | 873.396        | 872.412         | 908.433         | 907.449  | <b>86.096</b>  | 923.487  | <b>897.508</b>  | 880.481         | 5       | P   |
| 8       | T   | <b>963.476</b> | 946.449        | 945.465  | <b>991.471</b>  | 974.444        | <b>973.460</b>  | 1009.481        | 1008.497 | 74.060         | 1109.567 | <b>1083.587</b> | 1066.561        | 4       | W   |
| 9       | L   | 1076.560       | 1059.533       | 1058.549 | <b>1104.555</b> | 1087.528       | <b>1086.544</b> | 1122.565        | 1121.581 | <b>86.096</b>  | 1269.597 | <b>1243.618</b> | 1226.591        | 3       | C*  |
| 10      | Y   | 1239.623       | 1222.597       | 1221.613 | <b>1267.618</b> | 1250.591       | 1249.607        | 1285.629        | 1284.645 | <b>136.076</b> | 1326.619 | <b>1300.639</b> | 1283.613        | 2       | G   |
| 11      | K   | 1367.718       | 1350.691       | 1349.707 | 1395.713        | 1378.686       | 1377.702        | <b>1413.724</b> | 1412.740 | 101.107        | 1439.703 | <b>1413.724</b> | <b>1396.697</b> | 1       | L   |

PLA<sub>2</sub> parentmass 1374.965

## Spectrum Analysis Report

|                  |          |                   |          |                     |       |                  |          |
|------------------|----------|-------------------|----------|---------------------|-------|------------------|----------|
| Sequence Name:   |          | Parentmass:       | 1374.965 | Mass Error:         | 0.296 | MH+ (mono):      | 1374.669 |
| MH+ (avg):       | 1375.507 | Threshold (a.i.): | 0.000    | Tolerance (Da):     | 0.700 | Number of Peaks: | 77       |
| Above Threshold: | 77       | Assigned Peaks:   | 45       | Not assigned Peaks: | 32    |                  |          |

Abs. Int. \* 1000

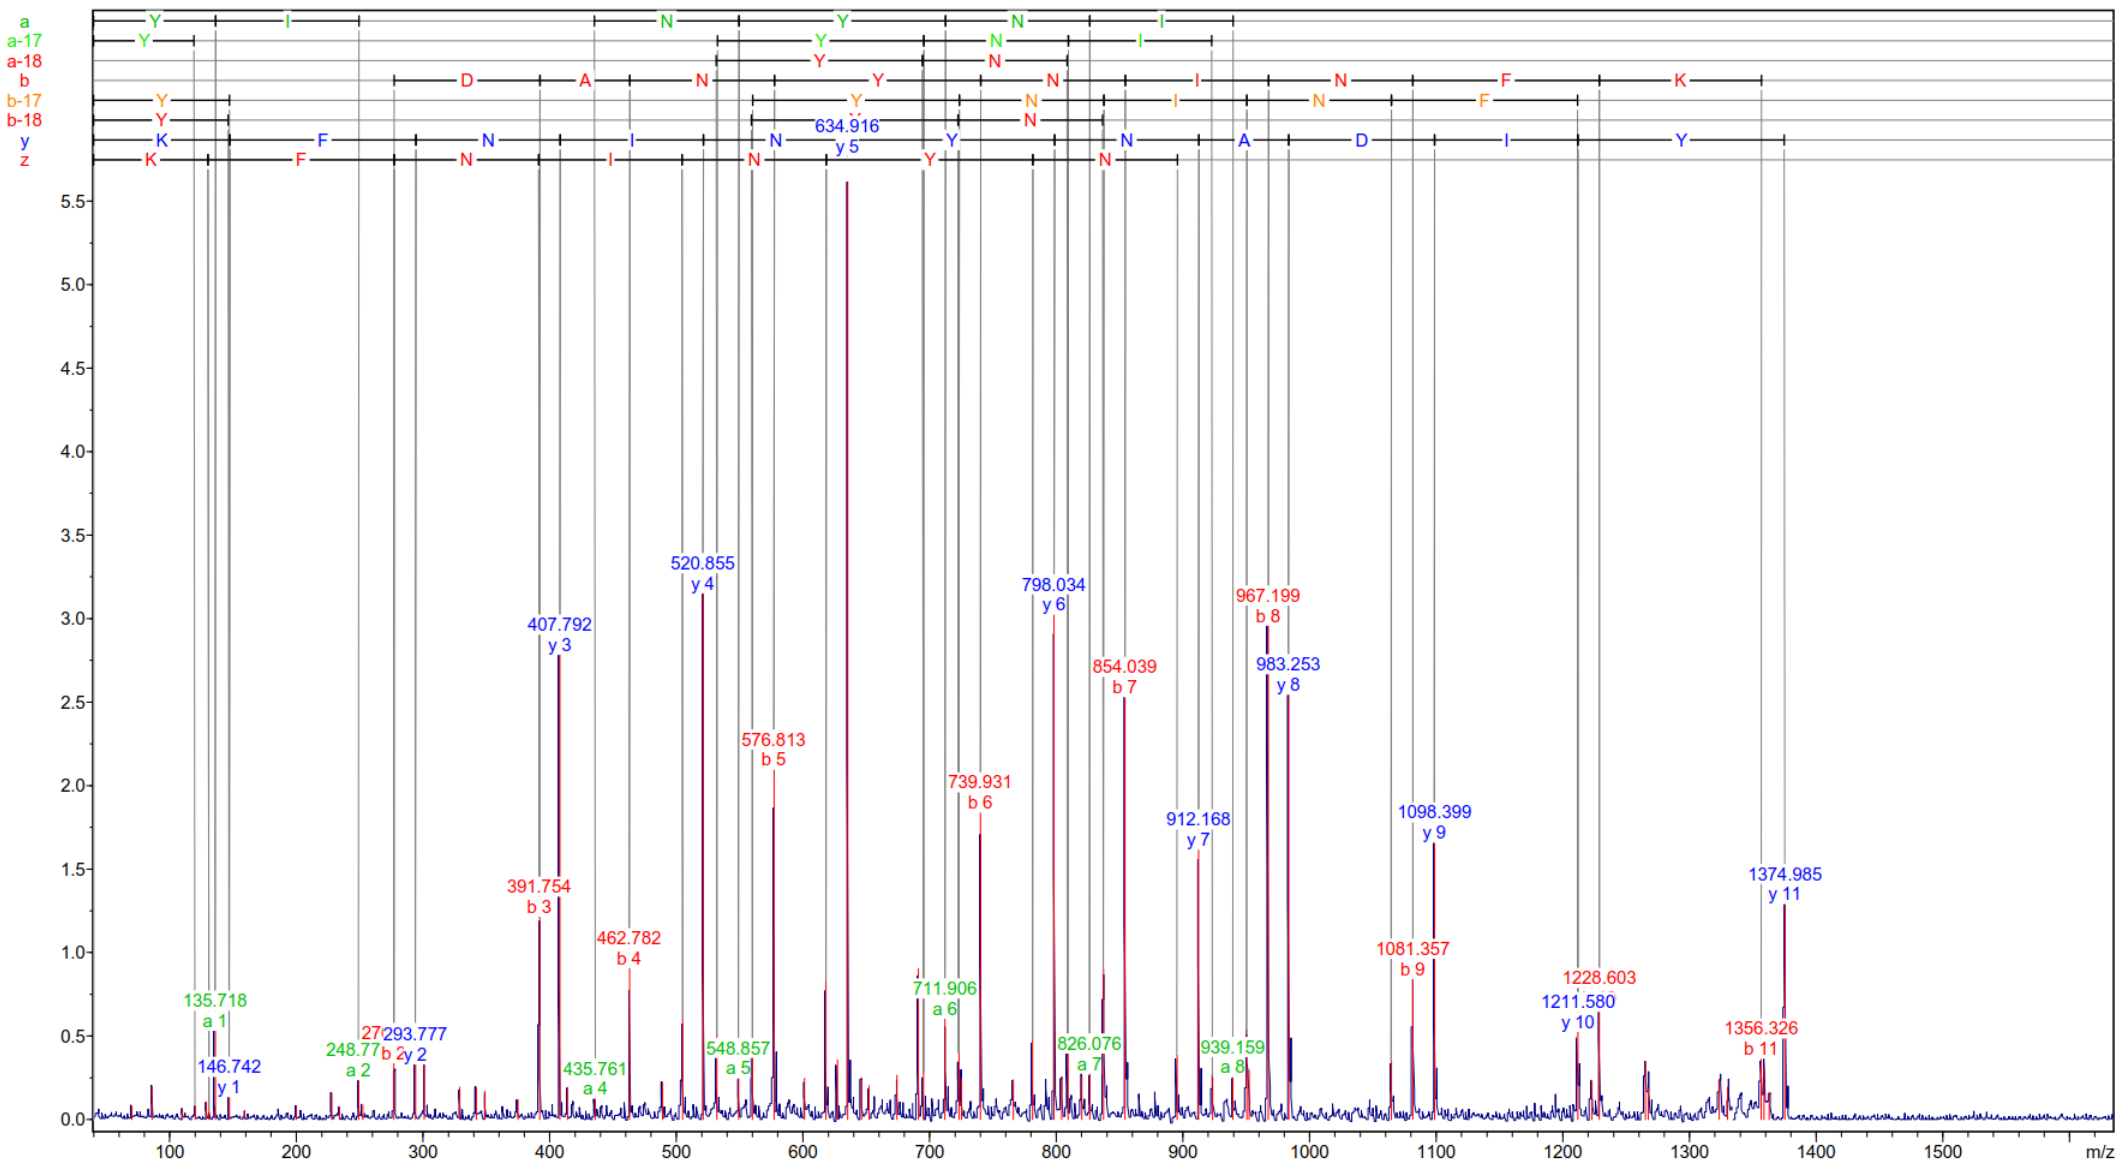

## Spectrum Analysis Report

### Display Parameter:

|                   |          |                     |       |                  |          |                  |          |
|-------------------|----------|---------------------|-------|------------------|----------|------------------|----------|
| Parentmass:       | 1374.965 | Mass Error:         | 0.296 | MH+ (mono):      | 1374.669 | MH+ (avg):       | 1375.507 |
| Threshold (a.i.): | 0.000    | Tolerance (Da):     | 0.700 | Number of Peaks: | 77       | Above Threshold: | 77       |
| Assigned Peaks:   | 45       | Not assigned Peaks: | 32    |                  |          |                  |          |

### Peaklist:

| Peak | Mass     | Intensity |
|------|----------|-----------|------|----------|-----------|------|----------|-----------|------|----------|-----------|------|----------|-----------|
| 1    | 69.760   | 80.831    | 2    | 85.809   | 193.858   | 3    | 109.730  | 62.307    | 4    | 119.743  | 80.293    | 5    | 128.768  | 106.130   |
| 6    | 130.728  | 60.820    | 7    | 135.718  | 529.588   | 8    | 146.742  | 133.809   | 9    | 158.706  | 51.443    | 10   | 199.735  | 80.922    |
| 11   | 227.722  | 156.291   | 12   | 233.684  | 73.614    | 13   | 248.773  | 234.686   | 14   | 252.074  | 88.513    | 15   | 276.744  | 337.594   |
| 16   | 293.777  | 329.748   | 17   | 300.700  | 423.174   | 18   | 328.739  | 195.362   | 19   | 341.760  | 194.718   | 20   | 348.750  | 170.379   |
| 21   | 374.747  | 119.851   | 22   | 391.754  | 1212.735  | 23   | 407.792  | 2782.157  | 24   | 413.787  | 192.163   | 25   | 435.761  | 124.818   |
| 26   | 462.782  | 904.240   | 27   | 488.812  | 224.368   | 28   | 504.812  | 601.138   | 29   | 520.855  | 3150.010  | 30   | 531.820  | 504.844   |
| 31   | 548.857  | 246.530   | 32   | 559.784  | 492.621   | 33   | 576.813  | 2093.551  | 34   | 600.843  | 247.337   | 35   | 617.880  | 827.060   |
| 36   | 626.837  | 357.422   | 37   | 634.916  | 5770.545  | 38   | 645.872  | 250.870   | 39   | 651.854  | 201.738   | 40   | 673.847  | 265.318   |
| 41   | 690.893  | 903.811   | 42   | 694.900  | 278.561   | 43   | 711.906  | 602.297   | 44   | 722.896  | 399.377   | 45   | 724.824  | 246.655   |
| 46   | 739.931  | 1836.828  | 47   | 765.924  | 237.760   | 48   | 781.013  | 479.544   | 49   | 798.034  | 3024.154  | 50   | 804.045  | 254.839   |
| 51   | 808.997  | 443.761   | 52   | 819.955  | 257.305   | 53   | 826.076  | 273.027   | 54   | 837.014  | 902.050   | 55   | 854.039  | 2528.446  |
| 56   | 895.106  | 384.090   | 57   | 912.168  | 1615.090  | 58   | 923.114  | 254.000   | 59   | 939.159  | 251.922   | 60   | 950.155  | 509.826   |
| 61   | 951.878  | 294.156   | 62   | 967.199  | 2955.598  | 63   | 983.253  | 2544.674  | 64   | 1064.333 | 350.866   | 65   | 1081.357 | 840.654   |
| 66   | 1098.399 | 1657.337  | 67   | 1211.580 | 522.936   | 68   | 1222.649 | 232.188   | 69   | 1228.603 | 667.272   | 70   | 1264.906 | 343.240   |
| 71   | 1267.119 | 184.674   | 72   | 1323.231 | 240.571   | 73   | 1329.836 | 195.455   | 74   | 1356.326 | 363.102   | 75   | 1358.453 | 311.348   |
| 76   | 1362.579 | 164.423   | 77   | 1374.985 | 1288.762  |      |          |           |      |          |           |      |          |           |

### Calculated Masses:

YDANYNINFK

| N-Term. | Ion | a        | a-17     | a-18     | b        | b-17     | b-18     | b+18     | c        | i       | x        | y        | z        | C-Term. | Ion |
|---------|-----|----------|----------|----------|----------|----------|----------|----------|----------|---------|----------|----------|----------|---------|-----|
| 1       | Y   | 136.076  | 119.049  | 118.065  | 164.071  | 147.044  | 146.060  | 182.081  | 181.097  | 136.076 | 173.092  | 147.113  | 130.086  | 11      | K   |
| 2       | I   | 249.160  | 232.133  | 231.149  | 277.155  | 260.128  | 259.144  | 295.165  | 294.181  | 86.096  | 320.160  | 294.181  | 277.155  | 10      | F   |
| 3       | D   | 364.187  | 347.160  | 346.176  | 392.182  | 375.155  | 374.171  | 410.192  | 409.208  | 88.039  | 434.203  | 408.224  | 391.198  | 9       | N   |
| 4       | A   | 435.224  | 418.197  | 417.213  | 463.219  | 446.192  | 445.208  | 481.229  | 480.245  | 44.049  | 547.287  | 521.308  | 504.282  | 8       | I   |
| 5       | N   | 549.267  | 532.240  | 531.256  | 577.262  | 560.235  | 559.251  | 595.272  | 594.288  | 87.055  | 661.330  | 635.351  | 618.325  | 7       | N   |
| 6       | Y   | 712.330  | 695.304  | 694.320  | 740.325  | 723.298  | 722.314  | 758.336  | 757.352  | 136.076 | 824.394  | 798.414  | 781.388  | 6       | Y   |
| 7       | N   | 826.373  | 809.346  | 808.362  | 854.368  | 837.341  | 836.357  | 872.378  | 871.394  | 87.055  | 938.437  | 912.457  | 895.431  | 5       | N   |
| 8       | I   | 939.457  | 922.431  | 921.446  | 967.452  | 950.425  | 949.441  | 985.463  | 984.479  | 86.096  | 1009.474 | 983.495  | 966.468  | 4       | A   |
| 9       | N   | 1053.500 | 1036.473 | 1035.489 | 1081.495 | 1064.468 | 1063.484 | 1099.505 | 1098.521 | 87.055  | 1124.501 | 1098.521 | 1081.495 | 3       | D   |
| 10      | F   | 1200.568 | 1183.542 | 1182.558 | 1228.563 | 1211.537 | 1210.553 | 1246.574 | 1245.590 | 120.081 | 1237.585 | 1211.606 | 1194.579 | 2       | I   |
| 11      | K   | 1328.663 | 1311.637 | 1310.653 | 1356.658 | 1339.632 | 1338.648 | 1374.669 | 1373.685 | 101.107 | 1400.648 | 1374.669 | 1357.642 | 1       | Y   |

PLA<sub>2</sub> parentmass 1512.841

## Spectrum Analysis Report

|                  |          |                   |          |                     |       |                  |          |
|------------------|----------|-------------------|----------|---------------------|-------|------------------|----------|
| Sequence Name:   |          | Parentmass:       | 1512.841 | Mass Error:         | 0.274 | MH+ (mono):      | 1512.567 |
| MH+ (avg):       | 1513.661 | Threshold (a.i.): | 0.000    | Tolerance (Da):     | 0.700 | Number of Peaks: | 72       |
| Above Threshold: | 72       | Assigned Peaks:   | 38       | Not assigned Peaks: | 34    |                  |          |

Abs. Int. \* 1000

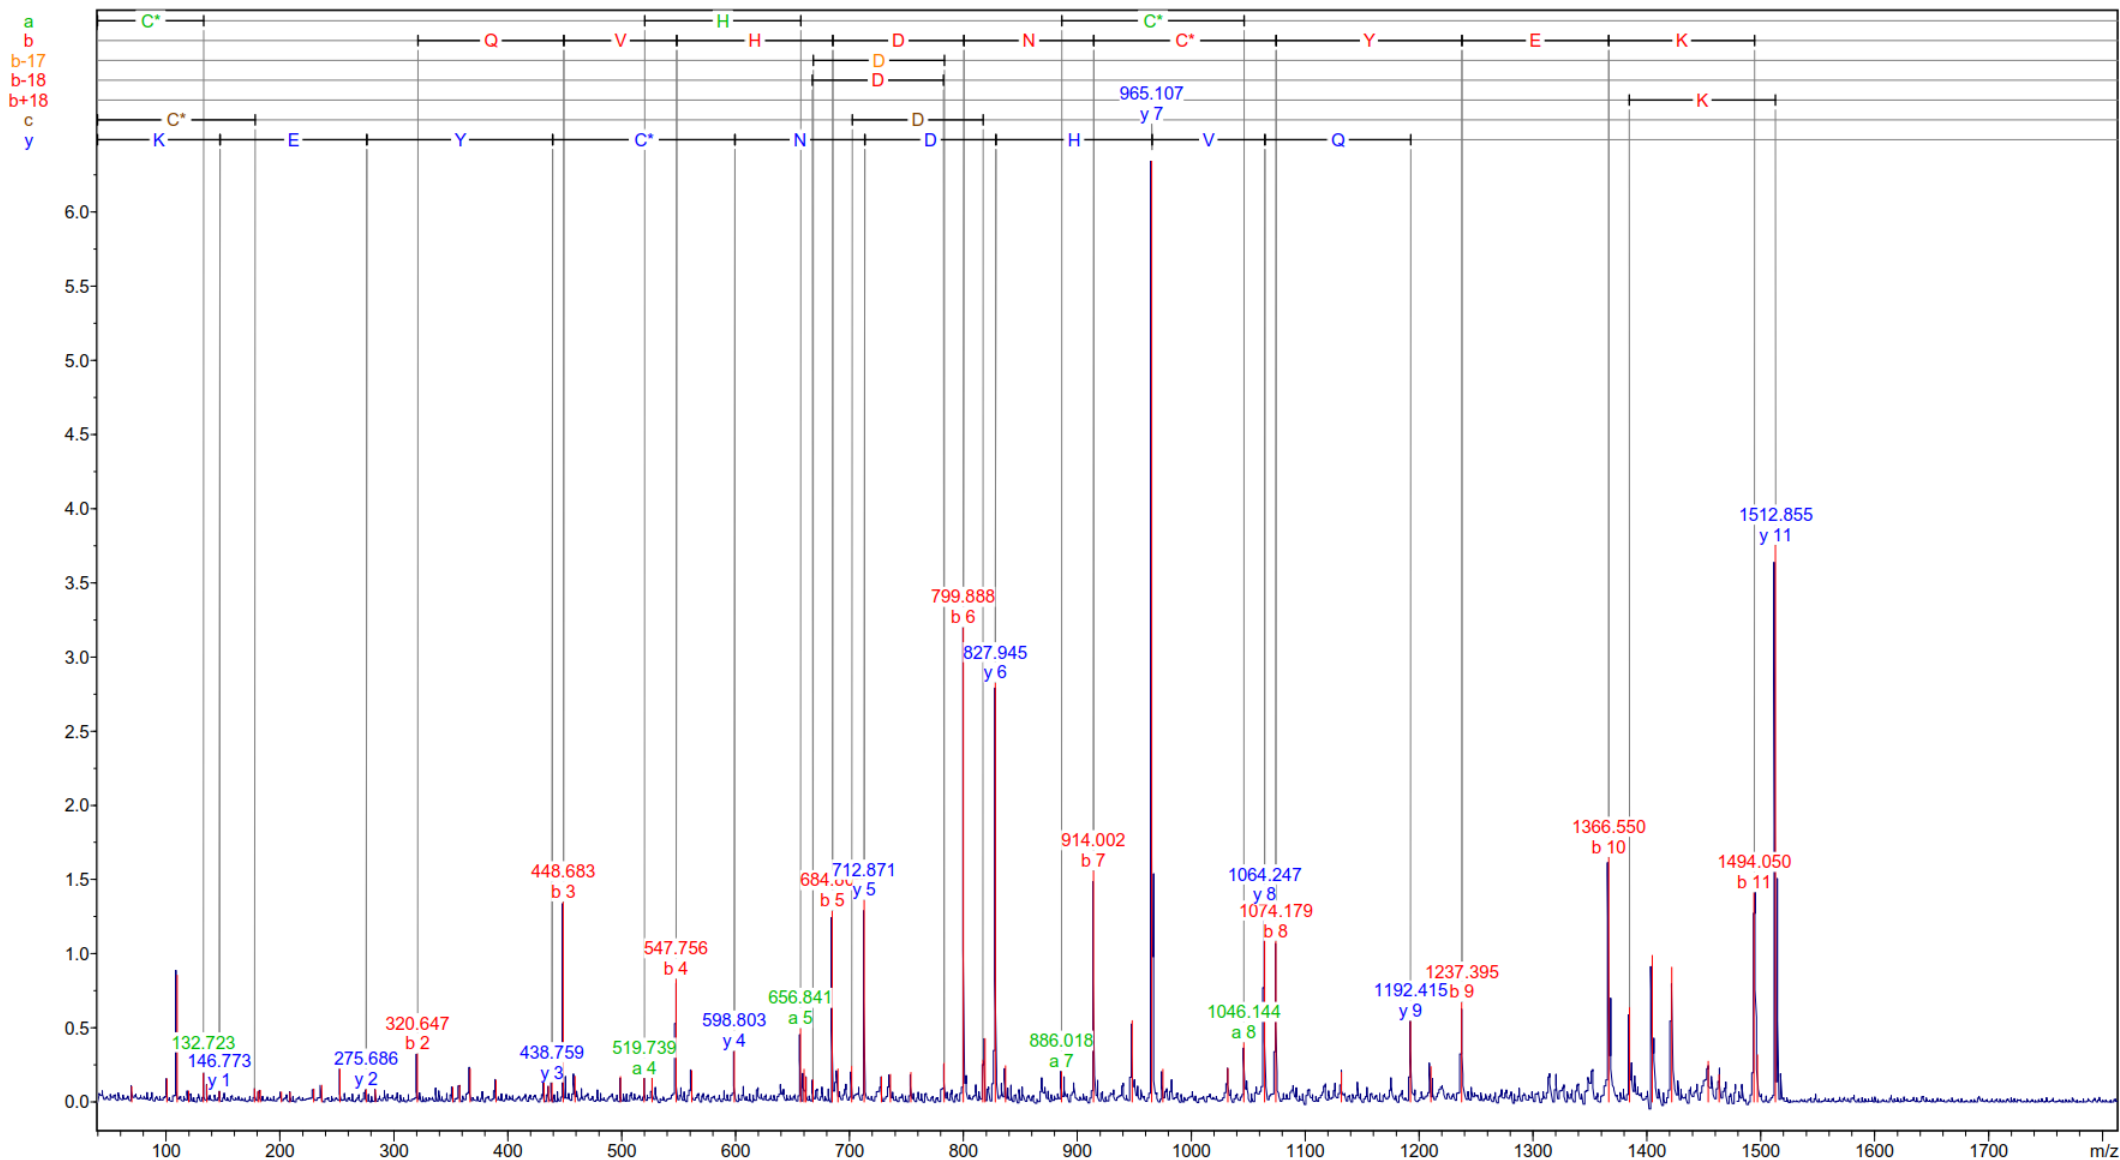

## Spectrum Analysis Report

### Display Parameter:

|                   |          |                     |       |                  |          |                  |          |
|-------------------|----------|---------------------|-------|------------------|----------|------------------|----------|
| Parentmass:       | 1512.841 | Mass Error:         | 0.274 | MH+ (mono):      | 1512.567 | MH+ (avg):       | 1513.661 |
| Threshold (a.i.): | 0.000    | Tolerance (Da):     | 0.700 | Number of Peaks: | 72       | Above Threshold: | 72       |
| Assigned Peaks:   | 38       | Not assigned Peaks: | 34    |                  |          |                  |          |

### Peaklist:

| Peak | Mass     | Intensity |
|------|----------|-----------|------|----------|-----------|------|----------|-----------|------|----------|-----------|------|----------|-----------|
| 1    | 69.765   | 105.414   | 2    | 100.759  | 155.402   | 3    | 109.751  | 855.150   | 4    | 119.853  | 74.067    | 5    | 132.723  | 197.074   |
| 6    | 135.716  | 115.059   | 7    | 146.773  | 74.279    | 8    | 177.679  | 92.621    | 9    | 180.675  | 71.284    | 10   | 182.719  | 79.494    |
| 11   | 201.069  | 67.196    | 12   | 208.712  | 65.436    | 13   | 229.659  | 86.641    | 14   | 236.693  | 114.134   | 15   | 252.672  | 261.935   |
| 16   | 275.686  | 87.872    | 17   | 283.719  | 82.500    | 18   | 320.647  | 326.244   | 19   | 351.746  | 99.820    | 20   | 357.720  | 113.661   |
| 21   | 366.716  | 224.168   | 22   | 389.667  | 148.440   | 23   | 431.669  | 135.152   | 24   | 435.706  | 105.928   | 25   | 438.759  | 132.046   |
| 26   | 448.683  | 1352.136  | 27   | 458.919  | 174.487   | 28   | 498.707  | 170.346   | 29   | 519.739  | 162.266   | 30   | 526.698  | 259.624   |
| 31   | 547.756  | 832.232   | 32   | 561.507  | 212.701   | 33   | 598.803  | 345.370   | 34   | 656.841  | 497.099   | 35   | 659.994  | 221.538   |
| 36   | 661.803  | 167.029   | 37   | 667.813  | 155.253   | 38   | 684.806  | 1290.829  | 39   | 689.751  | 222.696   | 40   | 701.822  | 242.105   |
| 41   | 712.871  | 1362.469  | 42   | 727.885  | 170.085   | 43   | 735.786  | 185.863   | 44   | 753.909  | 198.710   | 45   | 782.867  | 266.938   |
| 46   | 799.888  | 3200.925  | 47   | 816.924  | 282.773   | 48   | 818.891  | 428.641   | 49   | 827.945  | 2827.844  | 50   | 836.938  | 244.590   |
| 51   | 886.018  | 207.920   | 52   | 914.002  | 1559.957  | 53   | 948.071  | 549.597   | 54   | 965.107  | 6594.201  | 55   | 975.171  | 221.043   |
| 56   | 1032.041 | 227.772   | 57   | 1046.144 | 402.888   | 58   | 1064.247 | 1329.093  | 59   | 1074.179 | 1086.730  | 60   | 1131.820 | 199.880   |
| 61   | 1192.415 | 547.122   | 62   | 1210.411 | 237.523   | 63   | 1237.395 | 673.626   | 64   | 1366.550 | 1650.021  | 65   | 1384.583 | 640.307   |
| 66   | 1404.605 | 988.705   | 67   | 1421.726 | 909.445   | 68   | 1453.690 | 274.215   | 69   | 1463.326 | 185.344   | 70   | 1494.050 | 1413.756  |
| 71   | 1497.101 | 318.595   | 72   | 1512.855 | 3755.724  |      |          |           |      |          |           |      |          |           |

### Calculated Masses:

CCQVHDNCYEK 1: Carbamidomethyl (C) 2: Carbamidomethyl (C) 8: Carbamidomethyl (C)

| N-Term. | Ion | a        | a-17     | a-18     | b        | b-17     | b-18     | b+18     | c        | i       | x        | y        | z        | C-Term. | Ion |
|---------|-----|----------|----------|----------|----------|----------|----------|----------|----------|---------|----------|----------|----------|---------|-----|
| 1       | C*  | 133.043  | 116.016  | 115.032  | 161.038  | 144.011  | 143.027  | 179.048  | 178.064  | 133.043 | 173.092  | 147.113  | 130.086  | 11      | K   |
| 2       | C*  | 293.074  | 276.047  | 275.063  | 321.069  | 304.042  | 303.058  | 339.079  | 338.095  | 133.043 | 302.135  | 276.155  | 259.129  | 10      | E   |
| 3       | Q   | 421.132  | 404.106  | 403.122  | 449.127  | 432.101  | 431.117  | 467.138  | 466.154  | 101.071 | 465.198  | 439.219  | 422.192  | 9       | Y   |
| 4       | V   | 520.201  | 503.174  | 502.190  | 548.196  | 531.169  | 530.185  | 566.206  | 565.222  | 72.081  | 625.229  | 599.249  | 582.223  | 8       | C*  |
| 5       | H   | 657.260  | 640.233  | 639.249  | 685.254  | 668.228  | 667.244  | 703.265  | 702.281  | 110.071 | 739.272  | 713.292  | 696.266  | 7       | N   |
| 6       | D   | 772.287  | 755.260  | 754.276  | 800.281  | 783.255  | 782.271  | 818.292  | 817.308  | 88.039  | 854.299  | 828.319  | 811.293  | 6       | D   |
| 7       | N   | 886.329  | 869.303  | 868.319  | 914.324  | 897.298  | 896.314  | 932.335  | 931.351  | 87.055  | 991.357  | 965.378  | 948.352  | 5       | H   |
| 8       | C*  | 1046.360 | 1029.334 | 1028.350 | 1074.355 | 1057.328 | 1056.344 | 1092.366 | 1091.382 | 133.043 | 1090.426 | 1064.447 | 1047.420 | 4       | V   |
| 9       | Y   | 1209.423 | 1192.397 | 1191.413 | 1237.418 | 1220.392 | 1219.408 | 1255.429 | 1254.445 | 136.076 | 1218.484 | 1192.505 | 1175.479 | 3       | Q   |
| 10      | E   | 1338.466 | 1321.439 | 1320.455 | 1366.461 | 1349.434 | 1348.450 | 1384.471 | 1383.487 | 102.055 | 1378.515 | 1352.536 | 1335.509 | 2       | C*  |
| 11      | K   | 1466.561 | 1449.534 | 1448.550 | 1494.556 | 1477.529 | 1476.545 | 1512.566 | 1511.582 | 101.107 | 1538.546 | 1512.566 | 1495.540 | 1       | C*  |

# PLA<sub>2</sub> parentmass 2157.377

## Spectrum Analysis Report

|                        |          |                   |          |                     |       |                         |          |
|------------------------|----------|-------------------|----------|---------------------|-------|-------------------------|----------|
| Sequence Name:         | 2158.451 | Parentmass:       | 2157.377 | Mass Error:         | 0.467 | MH <sup>+</sup> (mono): | 2156.910 |
| MH <sup>+</sup> (avg): | 119      | Threshold (a.i.): | 0.000    | Tolerance (Da):     | 1.000 | Number of Peaks:        | 119      |
| Above Threshold:       |          | Assigned Peaks:   | 70       | Not assigned Peaks: | 49    |                         |          |

Abs. Int. \* 1000

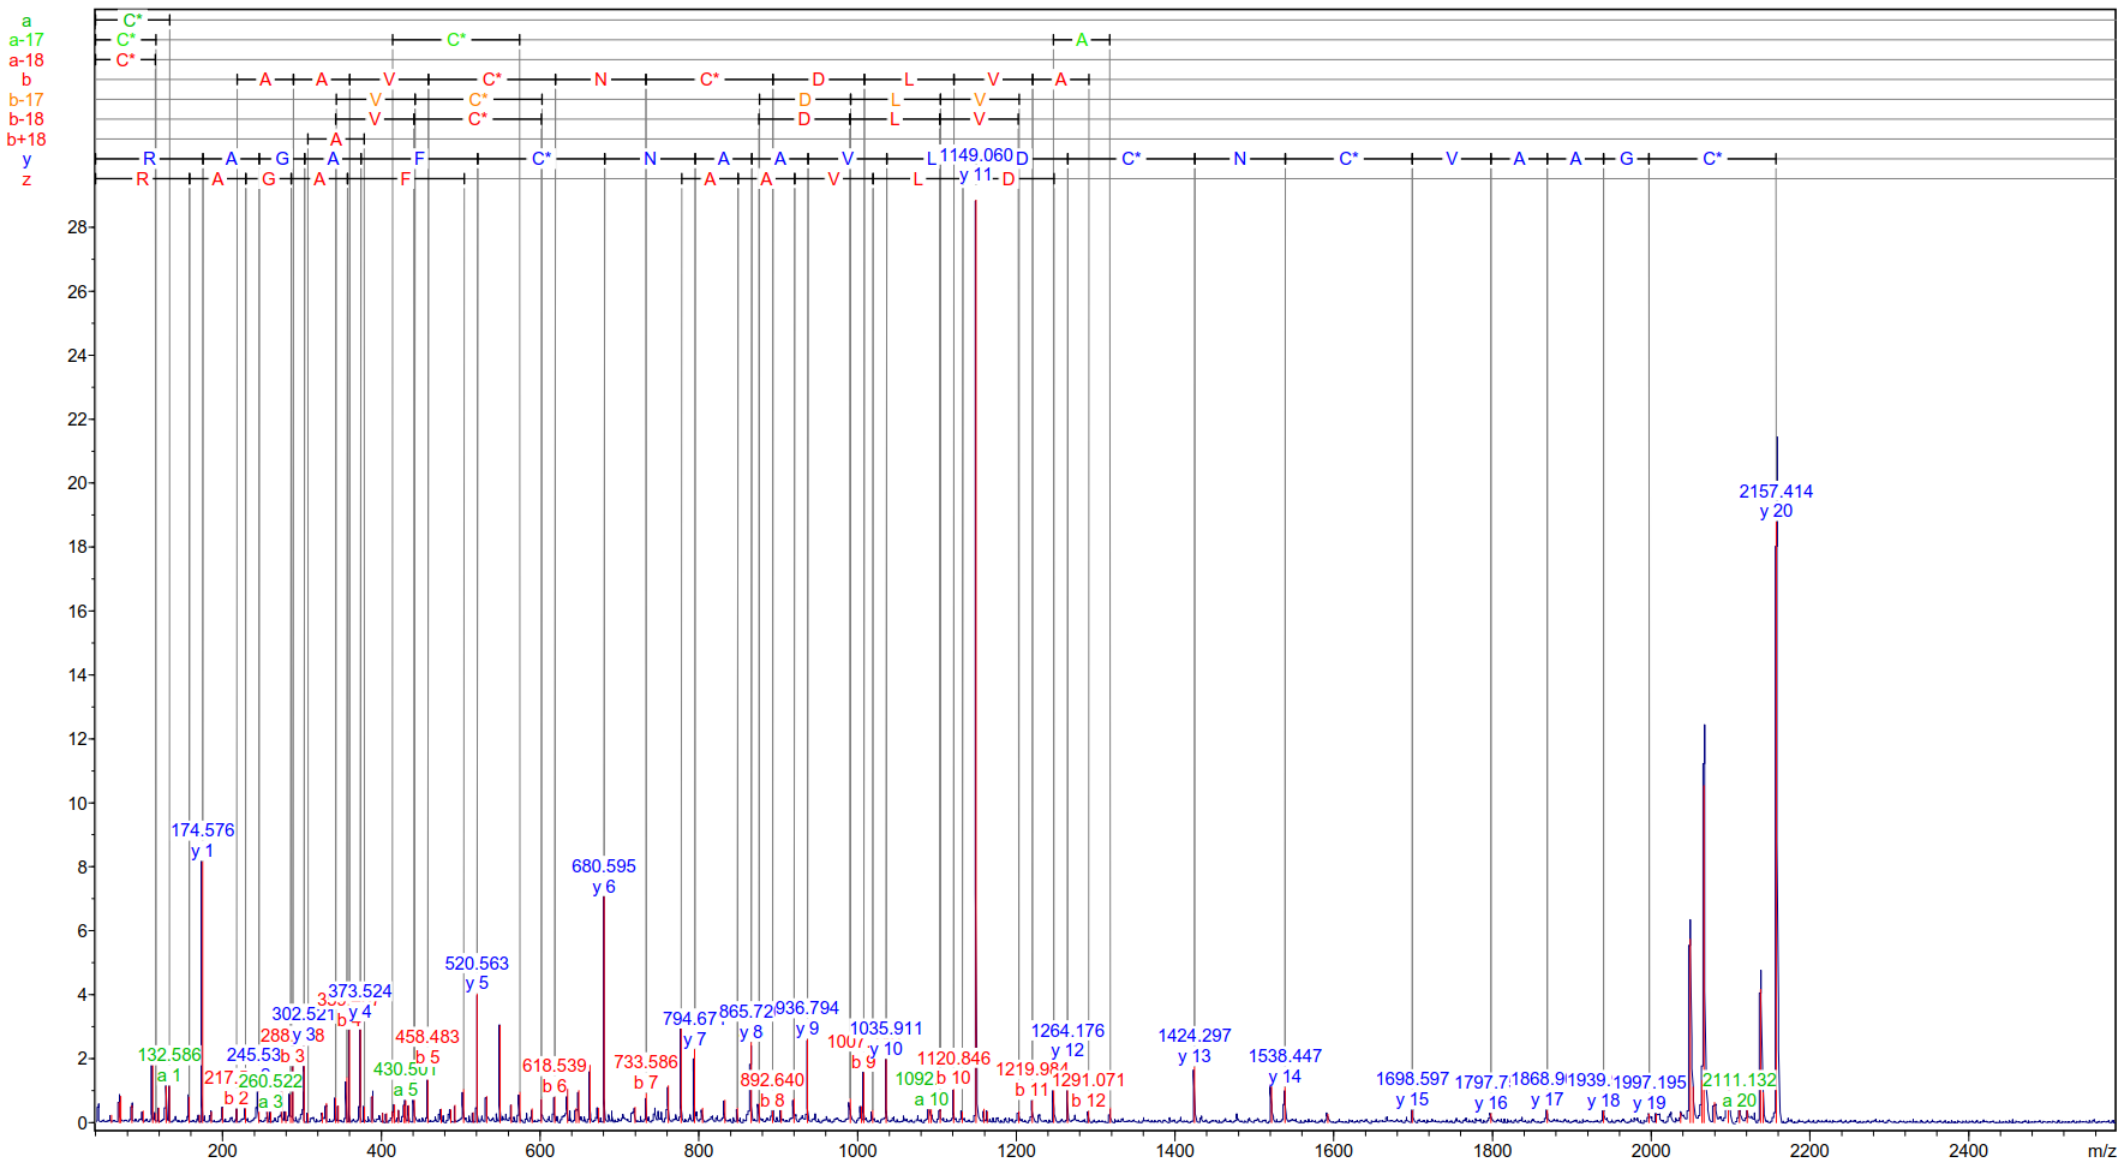

## Spectrum Analysis Report

### Display Parameter:

|                   |          |                     |       |                  |          |                  |          |
|-------------------|----------|---------------------|-------|------------------|----------|------------------|----------|
| Parentmass:       | 2157.377 | Mass Error:         | 0.467 | MH+ (mono):      | 2156.910 | MH+ (avg):       | 2158.451 |
| Threshold (a.i.): | 0.000    | Tolerance (Da):     | 1.000 | Number of Peaks: | 119      | Above Threshold: | 119      |
| Assigned Peaks:   | 70       | Not assigned Peaks: | 49    |                  |          |                  |          |

### Peaklist:

| Peak | Mass     | Intensity |
|------|----------|-----------|------|----------|-----------|------|----------|-----------|------|----------|-----------|------|----------|-----------|
| 1    | 59.757   | 239.650   | 2    | 69.697   | 633.067   | 3    | 71.706   | 827.641   | 4    | 85.682   | 532.256   | 5    | 99.645   | 360.432   |
| 6    | 111.636  | 2273.177  | 7    | 115.666  | 306.060   | 8    | 119.620  | 456.591   | 9    | 128.617  | 1134.624  | 10   | 132.586  | 1156.037  |
| 11   | 157.598  | 823.558   | 12   | 170.590  | 231.024   | 13   | 174.576  | 8181.252  | 14   | 185.563  | 335.828   | 15   | 199.582  | 469.421   |
| 16   | 217.501  | 438.826   | 17   | 228.534  | 561.622   | 18   | 245.531  | 1170.841  | 19   | 256.508  | 380.802   | 20   | 260.522  | 326.951   |
| 21   | 274.452  | 1544.024  | 22   | 279.463  | 334.092   | 23   | 285.520  | 886.466   | 24   | 288.468  | 1761.058  | 25   | 302.521  | 2448.717  |
| 26   | 307.474  | 298.811   | 27   | 325.479  | 305.653   | 28   | 330.481  | 601.369   | 29   | 342.453  | 789.415   | 30   | 345.455  | 525.222   |
| 31   | 356.501  | 1424.989  | 32   | 359.467  | 2900.007  | 33   | 373.524  | 3152.554  | 34   | 378.456  | 500.804   | 35   | 388.457  | 825.870   |
| 36   | 401.496  | 299.918   | 37   | 406.458  | 281.085   | 38   | 413.492  | 362.346   | 39   | 416.468  | 554.288   | 40   | 421.446  | 382.504   |
| 41   | 428.505  | 549.565   | 42   | 430.501  | 698.637   | 43   | 434.395  | 533.416   | 44   | 441.472  | 1190.614  | 45   | 458.483  | 1729.922  |
| 46   | 475.486  | 423.810   | 47   | 487.520  | 400.846   | 48   | 492.476  | 546.039   | 49   | 503.522  | 1042.363  | 50   | 515.504  | 311.386   |
| 51   | 520.563  | 4030.591  | 52   | 532.433  | 810.838   | 53   | 549.440  | 3041.273  | 54   | 563.507  | 554.775   | 55   | 574.570  | 952.986   |
| 56   | 589.589  | 436.613   | 57   | 601.546  | 748.359   | 58   | 618.539  | 810.968   | 59   | 634.543  | 1058.436  | 60   | 645.520  | 440.518   |
| 61   | 648.503  | 1002.255  | 62   | 662.533  | 1801.241  | 63   | 673.534  | 454.785   | 64   | 680.595  | 7078.807  | 65   | 719.562  | 485.800   |
| 66   | 733.586  | 930.266   | 67   | 761.610  | 1158.852  | 68   | 777.643  | 3121.730  | 69   | 794.671  | 2307.713  | 70   | 804.654  | 451.707   |
| 71   | 832.677  | 703.486   | 72   | 848.648  | 476.122   | 73   | 865.720  | 2526.557  | 74   | 875.699  | 607.531   | 75   | 892.640  | 377.998   |
| 76   | 903.692  | 408.604   | 77   | 919.733  | 763.340   | 78   | 936.794  | 2625.978  | 79   | 990.703  | 757.323   | 80   | 1004.860 | 501.384   |
| 81   | 1007.749 | 1580.478  | 82   | 1018.808 | 393.415   | 83   | 1035.911 | 1989.835  | 84   | 1089.943 | 897.591   | 85   | 1092.877 | 415.047   |
| 86   | 1103.864 | 484.908   | 87   | 1120.846 | 1074.166  | 88   | 1131.897 | 354.731   | 89   | 1149.060 | 29330.044 | 90   | 1159.057 | 420.935   |
| 91   | 1163.075 | 340.930   | 92   | 1202.980 | 370.257   | 93   | 1219.984 | 703.553   | 94   | 1247.133 | 1489.734  | 95   | 1264.176 | 1933.132  |
| 96   | 1291.071 | 372.413   | 97   | 1318.219 | 462.333   | 98   | 1424.297 | 1751.637  | 99   | 1521.383 | 1140.292  | 100  | 1538.447 | 1125.620  |
| 101  | 1592.465 | 265.461   | 102  | 1698.597 | 405.434   | 103  | 1797.758 | 300.945   | 104  | 1868.904 | 404.862   | 105  | 1939.925 | 383.089   |
| 106  | 1997.195 | 295.380   | 107  | 2006.153 | 267.091   | 108  | 2037.018 | 307.094   | 109  | 2049.171 | 5744.442  | 110  | 2052.672 | 1111.264  |
| 111  | 2063.958 | 1328.731  | 112  | 2066.390 | 10547.850 | 113  | 2079.519 | 632.654   | 114  | 2096.814 | 1210.203  | 115  | 2111.132 | 381.282   |
| 116  | 2120.571 | 461.005   | 117  | 2137.758 | 4165.351  | 118  | 2140.854 | 949.528   | 119  | 2157.414 | 18809.611 |      |          |           |

### Calculated Masses:

CGAAVCNCDLVAANCFAGAR 1: Carbamidomethyl (C) 6: Carbamidomethyl (C) 8: Carbamidomethyl (C) 15: Carbamidomethyl (C)

| N-Term. | Ion | a        | a-17     | a-18     | b        | b-17     | b-18     | b+18     | c        | i       | x        | y        | z        | C-Term. | Ion |
|---------|-----|----------|----------|----------|----------|----------|----------|----------|----------|---------|----------|----------|----------|---------|-----|
| 1       | C*  | 133.043  | 116.016  | 115.032  | 161.038  | 144.011  | 143.027  | 179.048  | 178.064  | 133.043 | 201.098  | 175.119  | 158.092  | 20      | R   |
| 2       | G   | 190.064  | 173.038  | 172.054  | 218.059  | 201.033  | 200.049  | 236.070  | 235.086  | 30.034  | 272.135  | 246.156  | 229.130  | 19      | A   |
| 3       | A   | 261.102  | 244.075  | 243.091  | 289.097  | 272.070  | 271.086  | 307.107  | 306.123  | 44.049  | 329.157  | 303.178  | 286.151  | 18      | G   |
| 4       | A   | 332.139  | 315.112  | 314.128  | 360.134  | 343.107  | 342.123  | 378.144  | 377.160  | 44.049  | 400.194  | 374.215  | 357.188  | 17      | A   |
| 5       | V   | 431.207  | 414.181  | 413.197  | 459.202  | 442.175  | 441.191  | 477.213  | 476.229  | 72.081  | 547.262  | 521.283  | 504.257  | 16      | F   |
| 6       | C*  | 591.238  | 574.211  | 573.227  | 619.233  | 602.206  | 601.222  | 637.243  | 636.259  | 133.043 | 707.293  | 681.314  | 664.287  | 15      | C*  |
| 7       | N   | 705.281  | 688.254  | 687.270  | 733.276  | 716.249  | 715.265  | 751.286  | 750.302  | 87.055  | 821.336  | 795.357  | 778.330  | 14      | N   |
| 8       | C*  | 865.311  | 848.285  | 847.301  | 893.306  | 876.280  | 875.296  | 911.317  | 910.333  | 133.043 | 892.373  | 866.394  | 849.367  | 13      | A   |
| 9       | D   | 980.338  | 963.312  | 962.328  | 1008.333 | 991.307  | 990.323  | 1026.344 | 1025.360 | 88.039  | 963.410  | 937.431  | 920.404  | 12      | A   |
| 10      | L   | 1093.422 | 1076.396 | 1075.412 | 1121.417 | 1104.391 | 1103.407 | 1139.428 | 1138.444 | 86.096  | 1062.479 | 1036.499 | 1019.473 | 11      | V   |
| 11      | V   | 1192.491 | 1175.464 | 1174.480 | 1220.486 | 1203.459 | 1202.475 | 1238.496 | 1237.512 | 72.081  | 1175.563 | 1149.583 | 1132.557 | 10      | L   |
| 12      | A   | 1263.528 | 1246.501 | 1245.517 | 1291.523 | 1274.496 | 1273.512 | 1309.533 | 1308.549 | 44.049  | 1290.590 | 1264.610 | 1247.584 | 9       | D   |
| 13      | A   | 1334.565 | 1317.538 | 1316.554 | 1362.560 | 1345.533 | 1344.549 | 1380.570 | 1379.586 | 44.049  | 1450.620 | 1424.641 | 1407.614 | 8       | C*  |
| 14      | N   | 1448.608 | 1431.581 | 1430.597 | 1476.603 | 1459.576 | 1458.592 | 1494.613 | 1493.629 | 87.055  | 1564.663 | 1538.684 | 1521.657 | 7       | N   |
| 15      | C*  | 1608.639 | 1591.612 | 1590.628 | 1636.633 | 1619.607 | 1618.623 | 1654.644 | 1653.660 | 133.043 | 1724.694 | 1698.715 | 1681.688 | 6       | C*  |
| 16      | F   | 1755.707 | 1738.680 | 1737.696 | 1783.702 | 1766.675 | 1765.691 | 1801.712 | 1800.728 | 120.081 | 1823.762 | 1797.783 | 1780.756 | 5       | V   |
| 17      | A   | 1826.744 | 1809.718 | 1808.734 | 1854.739 | 1837.712 | 1836.728 | 1872.750 | 1871.766 | 44.049  | 1894.799 | 1868.820 | 1851.793 | 4       | A   |
| 18      | G   | 1883.766 | 1866.739 | 1865.755 | 1911.760 | 1894.734 | 1893.750 | 1929.771 | 1928.787 | 30.034  | 1965.836 | 1939.857 | 1922.831 | 3       | A   |
| 19      | A   | 1954.803 | 1937.776 | 1936.792 | 1982.798 | 1965.771 | 1964.787 | 2000.808 | 1999.824 | 44.049  | 2022.858 | 1996.879 | 1979.852 | 2       | G   |
| 20      | R   | 2110.904 | 2093.877 | 2092.893 | 2138.899 | 2121.872 | 2120.888 | 2156.909 | 2155.925 | 129.113 | 2182.889 | 2156.909 | 2139.883 | 1       | C*  |

PLA<sub>2</sub> parentmass 1282.633

## Spectrum Analysis Report

|                  |          |                   |          |                     |           |                  |          |
|------------------|----------|-------------------|----------|---------------------|-----------|------------------|----------|
| Sequence Name:   |          | Parentmass:       | 1282.633 | Mass Error:         | -1281.448 | MH+ (mono):      | 2564.081 |
| MH+ (avg):       | 2565.854 | Threshold (a.i.): | 0.000    | Tolerance (Da):     | 0.700     | Number of Peaks: | 45       |
| Above Threshold: | 45       | Assigned Peaks:   | 20       | Not assigned Peaks: | 25        |                  |          |

Abs. Int. \* 1000

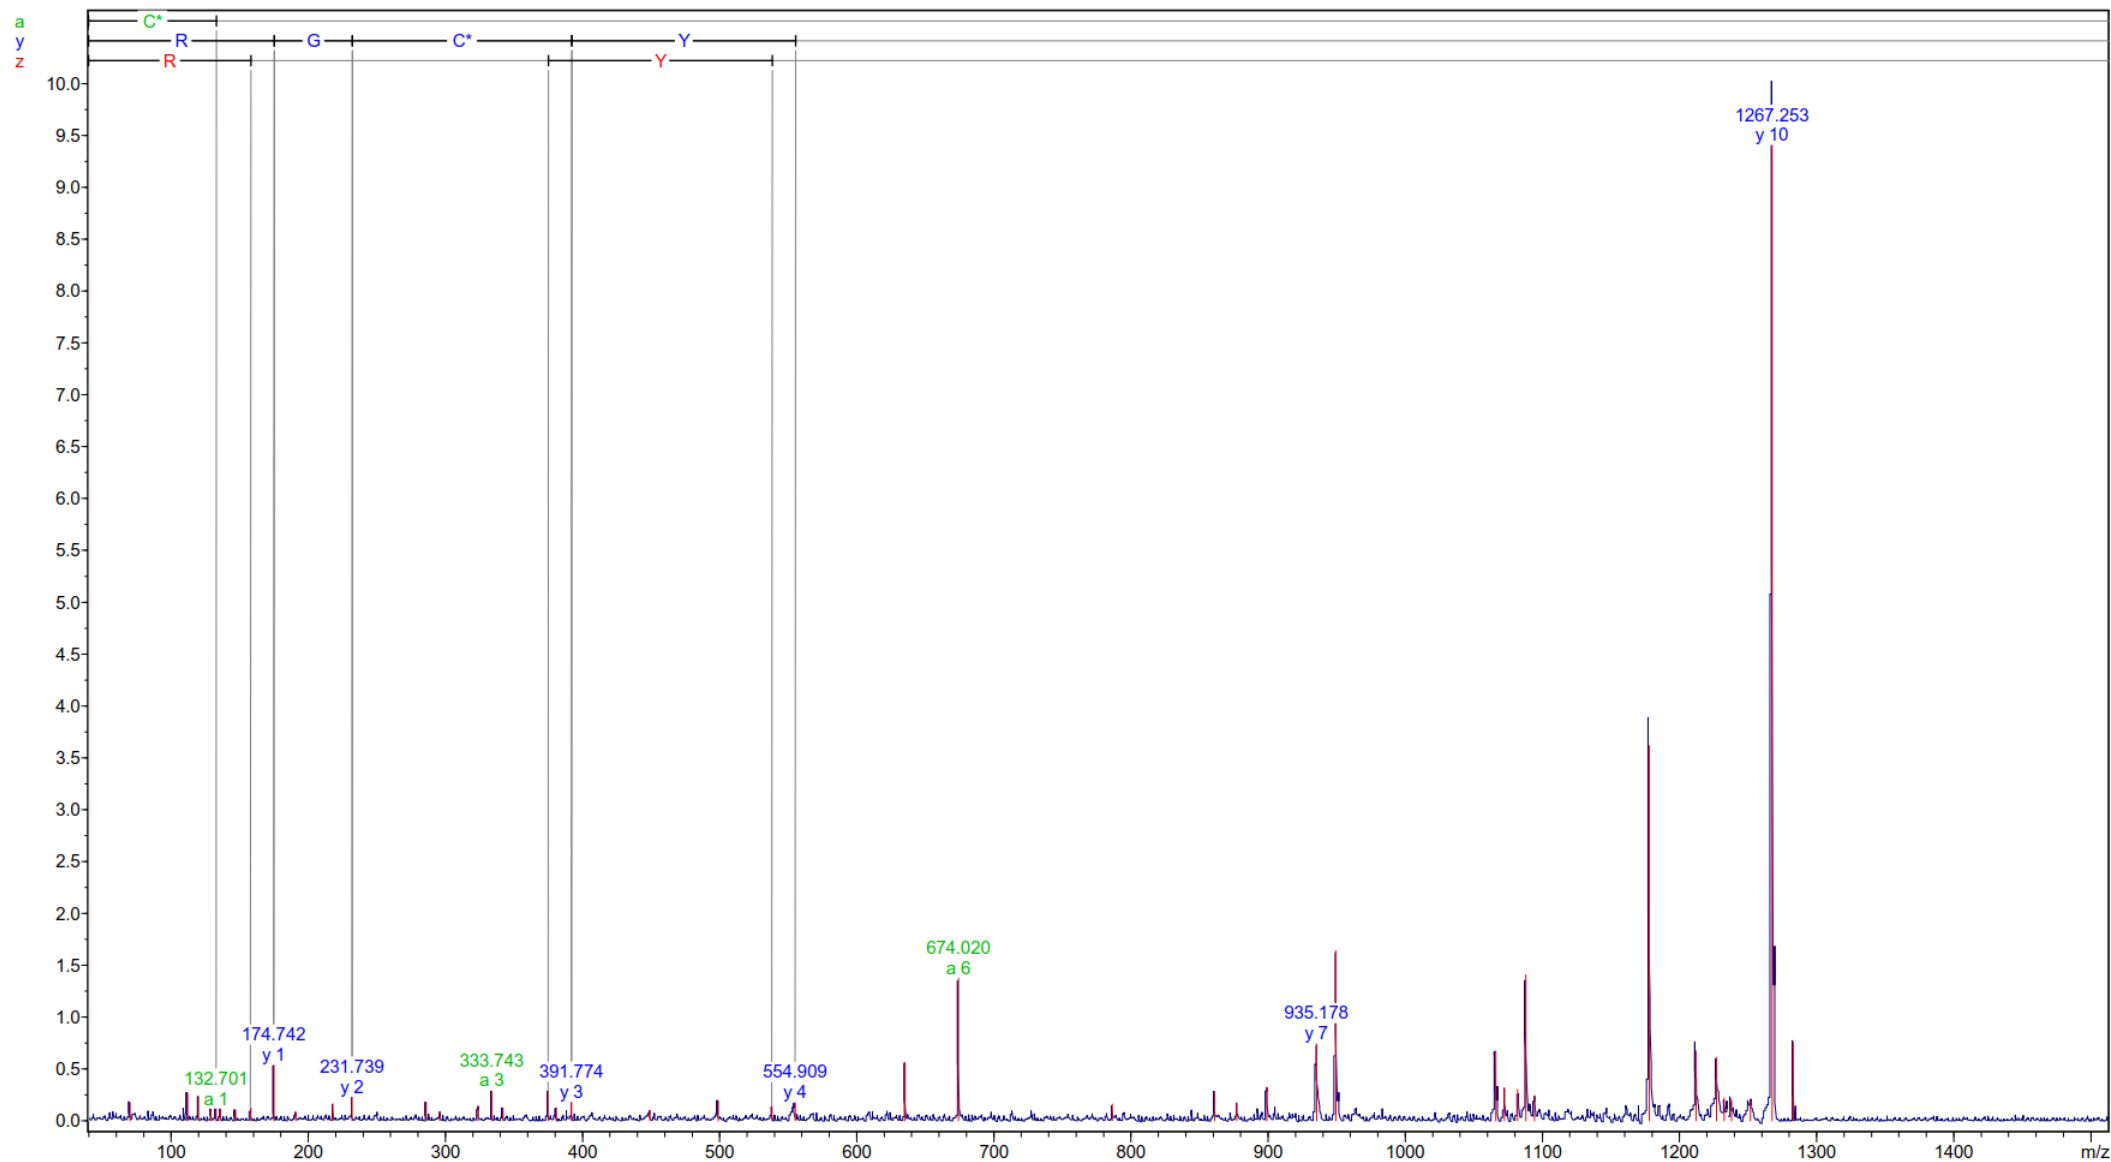

## Spectrum Analysis Report

### Display Parameter:

|                   |          |                     |           |                  |          |                  |          |
|-------------------|----------|---------------------|-----------|------------------|----------|------------------|----------|
| Parentmass:       | 1282.633 | Mass Error:         | -1281.448 | MH+ (mono):      | 2564.081 | MH+ (avg):       | 2565.854 |
| Threshold (a.i.): | 0.000    | Tolerance (Da):     | 0.700     | Number of Peaks: | 45       | Above Threshold: | 45       |
| Assigned Peaks:   | 20       | Not assigned Peaks: | 25        |                  |          |                  |          |

### Peaklist:

| Peak | Mass     | Intensity |
|------|----------|-----------|------|----------|-----------|------|----------|-----------|------|----------|-----------|------|----------|-----------|
| 1    | 69.771   | 173.126   | 2    | 111.754  | 271.256   | 3    | 119.741  | 235.020   | 4    | 128.743  | 191.840   | 5    | 132.701  | 118.291   |
| 6    | 135.746  | 352.677   | 7    | 146.718  | 103.336   | 8    | 157.735  | 122.066   | 9    | 174.742  | 540.559   | 10   | 190.734  | 83.144    |
| 11   | 217.683  | 166.196   | 12   | 231.739  | 232.087   | 13   | 285.760  | 178.769   | 14   | 295.748  | 83.143    | 15   | 323.726  | 142.544   |
| 16   | 333.743  | 292.533   | 17   | 341.752  | 120.367   | 18   | 374.756  | 287.914   | 19   | 380.717  | 124.366   | 20   | 391.774  | 181.951   |
| 21   | 448.796  | 100.827   | 22   | 498.793  | 195.291   | 23   | 537.876  | 144.595   | 24   | 554.909  | 178.969   | 25   | 635.028  | 563.021   |
| 26   | 674.020  | 1375.995  | 27   | 786.066  | 161.694   | 28   | 860.869  | 281.757   | 29   | 876.834  | 169.053   | 30   | 898.817  | 326.916   |
| 31   | 935.178  | 746.419   | 32   | 949.238  | 1638.368  | 33   | 1065.864 | 673.017   | 34   | 1072.097 | 312.206   | 35   | 1081.656 | 301.835   |
| 36   | 1087.830 | 1407.647  | 37   | 1094.117 | 241.323   | 38   | 1177.717 | 3617.273  | 39   | 1211.737 | 673.666   | 40   | 1226.843 | 608.556   |
| 41   | 1232.361 | 220.213   | 42   | 1237.635 | 202.337   | 43   | 1251.450 | 194.043   | 44   | 1267.253 | 9404.990  | 45   | 1282.653 | 761.214   |

### Calculated Masses:

CTVPSRSWWHFANYGCYCGR 1: Carbamidomethyl (C) 16: Carbamidomethyl (C) 18: Carbamidomethyl (C)

| N-Term. | Ion | a              | a-17           | a-18            | b        | b-17     | b-18     | b+18     | c               | i              | x        | y               | z              | C-Term. | Ion |
|---------|-----|----------------|----------------|-----------------|----------|----------|----------|----------|-----------------|----------------|----------|-----------------|----------------|---------|-----|
| 1       | C*  | <b>133.043</b> | 116.016        | 115.032         | 161.038  | 144.011  | 143.027  | 179.048  | 178.064         | <b>133.043</b> | 201.098  | <b>175.119</b>  | <b>158.092</b> | 20      | R   |
| 2       | T   | 234.091        | <b>217.064</b> | 216.080         | 262.086  | 245.059  | 244.075  | 280.096  | 279.112         | 74.060         | 258.120  | <b>232.140</b>  | 215.114        | 19      | G   |
| 3       | V   | <b>333.159</b> | 316.133        | 315.149         | 361.154  | 344.127  | 343.143  | 379.165  | 378.181         | 72.081         | 418.150  | <b>392.171</b>  | <b>375.145</b> | 18      | C*  |
| 4       | P   | 430.212        | 413.185        | 412.201         | 458.207  | 441.180  | 440.196  | 476.217  | 475.233         | <b>70.065</b>  | 581.214  | <b>555.234</b>  | <b>538.208</b> | 17      | Y   |
| 5       | S   | 517.244        | 500.217        | <b>499.233</b>  | 545.239  | 528.212  | 527.228  | 563.249  | 562.265         | 60.044         | 741.244  | 715.265         | 698.238        | 16      | C*  |
| 6       | R   | <b>673.345</b> | 656.318        | 655.334         | 701.340  | 684.313  | 683.329  | 719.350  | 718.366         | <b>129.113</b> | 798.266  | 772.287         | 755.260        | 15      | G   |
| 7       | S   | 760.377        | 743.350        | 742.366         | 788.372  | 771.345  | 770.361  | 806.383  | 805.398         | 60.044         | 961.329  | <b>935.350</b>  | 918.323        | 14      | Y   |
| 8       | W   | 946.456        | 929.430        | 928.446         | 974.451  | 957.425  | 956.441  | 992.462  | 991.478         | 159.092        | 1075.372 | 1049.393        | 1032.366       | 13      | N   |
| 9       | W   | 1132.536       | 1115.509       | 1114.525        | 1160.531 | 1143.504 | 1142.520 | 1178.541 | <b>1177.557</b> | 159.092        | 1146.409 | 1120.430        | 1103.403       | 12      | A   |
| 10      | H   | 1269.595       | 1252.568       | <b>1251.584</b> | 1297.589 | 1280.563 | 1279.579 | 1315.600 | 1314.616        | 110.071        | 1293.478 | <b>1267.498</b> | 1250.472       | 11      | F   |
| 11      | F   | 1416.663       | 1399.636       | 1398.652        | 1444.658 | 1427.631 | 1426.647 | 1462.668 | 1461.684        | <b>120.081</b> | 1430.536 | 1404.557        | 1387.531       | 10      | H   |
| 12      | A   | 1487.700       | 1470.674       | 1469.690        | 1515.695 | 1498.668 | 1497.684 | 1533.706 | 1532.722        | 44.049         | 1616.616 | 1590.637        | 1573.610       | 9       | W   |
| 13      | N   | 1601.743       | 1584.716       | 1583.732        | 1629.738 | 1612.711 | 1611.727 | 1647.749 | 1646.764        | 87.055         | 1802.695 | 1776.716        | 1759.689       | 8       | W   |
| 14      | Y   | 1764.806       | 1747.780       | 1746.796        | 1792.801 | 1775.775 | 1774.791 | 1810.812 | 1809.828        | <b>136.076</b> | 1889.727 | 1863.748        | 1846.721       | 7       | S   |
| 15      | G   | 1821.828       | 1804.801       | 1803.817        | 1849.823 | 1832.796 | 1831.812 | 1867.833 | 1866.849        | 30.034         | 2045.828 | 2019.849        | 2002.822       | 6       | R   |
| 16      | C*  | 1981.858       | 1964.832       | 1963.848        | 2009.853 | 1992.827 | 1991.843 | 2027.864 | 2026.880        | <b>133.043</b> | 2132.860 | 2106.881        | 2089.854       | 5       | S   |
| 17      | Y   | 2144.922       | 2127.895       | 2126.911        | 2172.917 | 2155.890 | 2154.906 | 2190.927 | 2189.943        | <b>136.076</b> | 2229.913 | 2203.934        | 2186.907       | 4       | P   |
| 18      | C*  | 2304.952       | 2287.926       | 2286.942        | 2332.947 | 2315.921 | 2314.937 | 2350.958 | 2349.974        | <b>133.043</b> | 2328.981 | 2303.002        | 2285.976       | 3       | V   |
| 19      | G   | 2361.974       | 2344.947       | 2343.963        | 2389.969 | 2372.942 | 2371.958 | 2407.979 | 2406.995        | 30.034         | 2430.029 | 2404.050        | 2387.023       | 2       | T   |
| 20      | R   | 2518.075       | 2501.048       | 2500.064        | 2546.070 | 2529.043 | 2528.059 | 2564.080 | 2563.096        | <b>129.113</b> | 2590.060 | 2564.080        | 2547.054       | 1       | C*  |

# VNGF parentmass 1127.664

## Spectrum Analysis Report

|                  |          |                   |          |                     |       |                  |          |
|------------------|----------|-------------------|----------|---------------------|-------|------------------|----------|
| Sequence Name:   | 1128.200 | Parentmass:       | 1127.664 | Mass Error:         | 0.174 | MH+ (mono):      | 1127.490 |
| MH+ (avg):       | 1128.200 | Threshold (a.i.): | 0.000    | Tolerance (Da):     | 0.700 | Number of Peaks: | 61       |
| Above Threshold: | 61       | Assigned Peaks:   | 35       | Not assigned Peaks: | 26    |                  |          |

Abs. Int. \* 1000

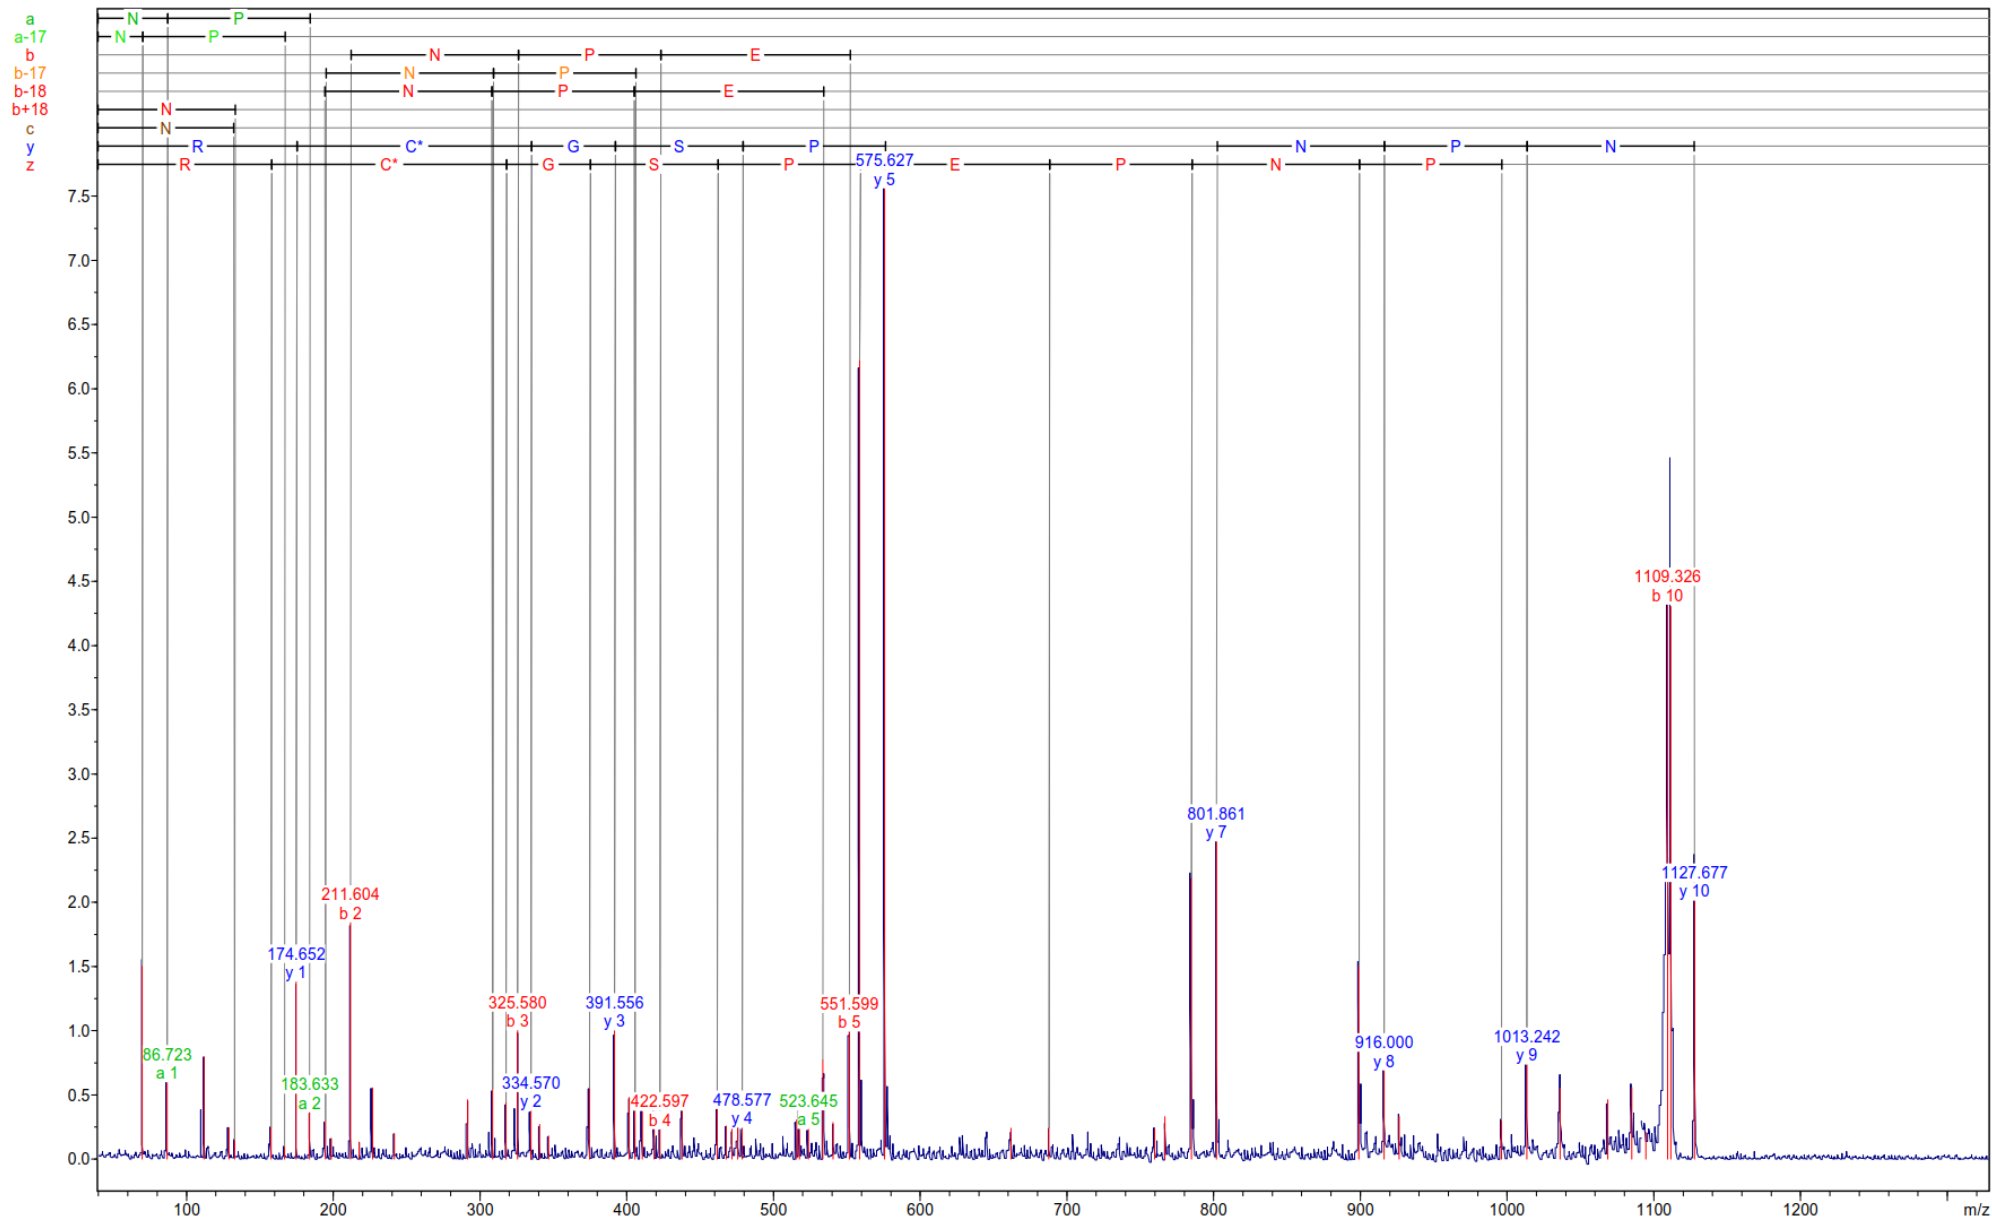

# Spectrum Analysis Report

## Display Parameter:

Parentmass: 1127.664 Mass Error: 0.174 MH+ (mono): 1127.490 MH+ (avg): 1128.200  
 Threshold (a.i.): 0.000 Tolerance (Da): 0.700 Number of Peaks: 61 Above Threshold: 61  
 Assigned Peaks: 35 Not assigned Peaks: 26

## Peaklist:

| Peak | Mass     | Intensity |
|------|----------|-----------|------|----------|-----------|------|----------|-----------|------|----------|-----------|------|----------|-----------|
| 1    | 69.755   | 1507.692  | 2    | 86.723   | 597.252   | 3    | 111.705  | 796.479   | 4    | 128.702  | 244.809   | 5    | 132.630  | 149.101   |
| 6    | 157.638  | 250.701   | 7    | 166.628  | 98.065    | 8    | 174.652  | 1381.300  | 9    | 183.633  | 364.591   | 10   | 194.589  | 298.395   |
| 11   | 198.629  | 162.054   | 12   | 211.604  | 1843.031  | 13   | 217.578  | 129.911   | 14   | 226.603  | 555.959   | 15   | 241.588  | 198.407   |
| 16   | 291.545  | 462.614   | 17   | 308.572  | 546.032   | 18   | 317.565  | 443.564   | 19   | 325.580  | 1002.996  | 20   | 334.570  | 375.074   |
| 21   | 340.571  | 271.084   | 22   | 346.584  | 181.385   | 23   | 374.563  | 554.517   | 24   | 391.556  | 1003.097  | 25   | 401.546  | 480.078   |
| 26   | 405.574  | 425.831   | 27   | 410.591  | 370.445   | 28   | 418.573  | 480.966   | 29   | 422.597  | 232.512   | 30   | 437.563  | 498.367   |
| 31   | 461.564  | 525.677   | 32   | 467.616  | 257.080   | 33   | 471.589  | 234.283   | 34   | 475.597  | 273.751   | 35   | 478.577  | 243.804   |
| 36   | 515.608  | 304.774   | 37   | 517.590  | 453.903   | 38   | 523.645  | 234.509   | 39   | 533.612  | 771.743   | 40   | 540.591  | 285.278   |
| 41   | 551.599  | 993.295   | 42   | 558.605  | 6222.914  | 43   | 575.627  | 7559.209  | 44   | 661.685  | 240.402   | 45   | 687.632  | 242.391   |
| 46   | 759.794  | 236.459   | 47   | 766.783  | 330.824   | 48   | 784.788  | 2192.744  | 49   | 801.861  | 2473.317  | 50   | 898.959  | 1503.160  |
| 51   | 916.000  | 691.797   | 52   | 926.399  | 333.543   | 53   | 996.143  | 302.459   | 54   | 1013.242 | 734.762   | 55   | 1035.933 | 552.829   |
| 56   | 1068.419 | 463.602   | 57   | 1084.917 | 557.547   | 58   | 1094.525 | 208.957   | 59   | 1109.326 | 4317.054  | 60   | 1111.385 | 4302.690  |
| 61   | 1127.677 | 2012.359  |      |          |           |      |          |           |      |          |           |      |          |           |

## Calculated Masses:

NPNPEPSGCR 9: Carbamidomethyl (C)

| N-Term. | Ion | a        | a-17     | a-18     | b        | b-17     | b-18     | b+18     | c        | i       | x        | y        | z        | C-Term. | Ion |
|---------|-----|----------|----------|----------|----------|----------|----------|----------|----------|---------|----------|----------|----------|---------|-----|
| 1       | N   | 87.055   | 70.029   | 69.045   | 115.050  | 98.024   | 97.040   | 133.061  | 132.077  | 87.055  | 201.098  | 175.119  | 158.092  | 10      | R   |
| 2       | P   | 184.108  | 167.082  | 166.097  | 212.103  | 195.076  | 194.092  | 230.114  | 229.130  | 70.065  | 361.129  | 335.150  | 318.123  | 9       | C*  |
| 3       | N   | 298.151  | 281.124  | 280.140  | 326.146  | 309.119  | 308.135  | 344.156  | 343.172  | 87.055  | 418.150  | 392.171  | 375.145  | 8       | G   |
| 4       | P   | 395.204  | 378.177  | 377.193  | 423.199  | 406.172  | 405.188  | 441.209  | 440.225  | 70.065  | 505.182  | 479.203  | 462.177  | 7       | S   |
| 5       | E   | 524.246  | 507.220  | 506.236  | 552.241  | 535.215  | 534.231  | 570.252  | 569.268  | 102.055 | 602.235  | 576.256  | 559.229  | 6       | P   |
| 6       | P   | 621.299  | 604.273  | 603.289  | 649.294  | 632.267  | 631.283  | 667.305  | 666.321  | 70.065  | 731.278  | 705.298  | 688.272  | 5       | E   |
| 7       | S   | 708.331  | 691.305  | 690.321  | 736.326  | 719.299  | 718.315  | 754.337  | 753.353  | 60.044  | 828.330  | 802.351  | 785.325  | 4       | P   |
| 8       | G   | 765.353  | 748.326  | 747.342  | 793.348  | 776.321  | 775.337  | 811.358  | 810.374  | 30.034  | 942.373  | 916.394  | 899.368  | 3       | N   |
| 9       | C*  | 925.383  | 908.357  | 907.373  | 953.378  | 936.352  | 935.368  | 971.389  | 970.405  | 133.043 | 1039.426 | 1013.447 | 996.420  | 2       | P   |
| 10      | R   | 1081.484 | 1064.458 | 1063.474 | 1109.479 | 1092.453 | 1091.469 | 1127.490 | 1126.506 | 129.113 | 1153.469 | 1127.490 | 1110.463 | 1       | N   |

# VNGF parentmass 1648.000

## Spectrum Analysis Report

|                  |          |                   |          |                     |       |                  |          |
|------------------|----------|-------------------|----------|---------------------|-------|------------------|----------|
| Sequence Name:   | 1648.818 | Parentmass:       | 1648.000 | Mass Error:         | 0.199 | MH+ (mono):      | 1647.801 |
| MH+ (avg):       | 1648.818 | Threshold (a.i.): | 0.000    | Tolerance (Da):     | 0.700 | Number of Peaks: | 57       |
| Above Threshold: | 57       | Assigned Peaks:   | 26       | Not assigned Peaks: | 31    |                  |          |

Abs. Int. \* 1000

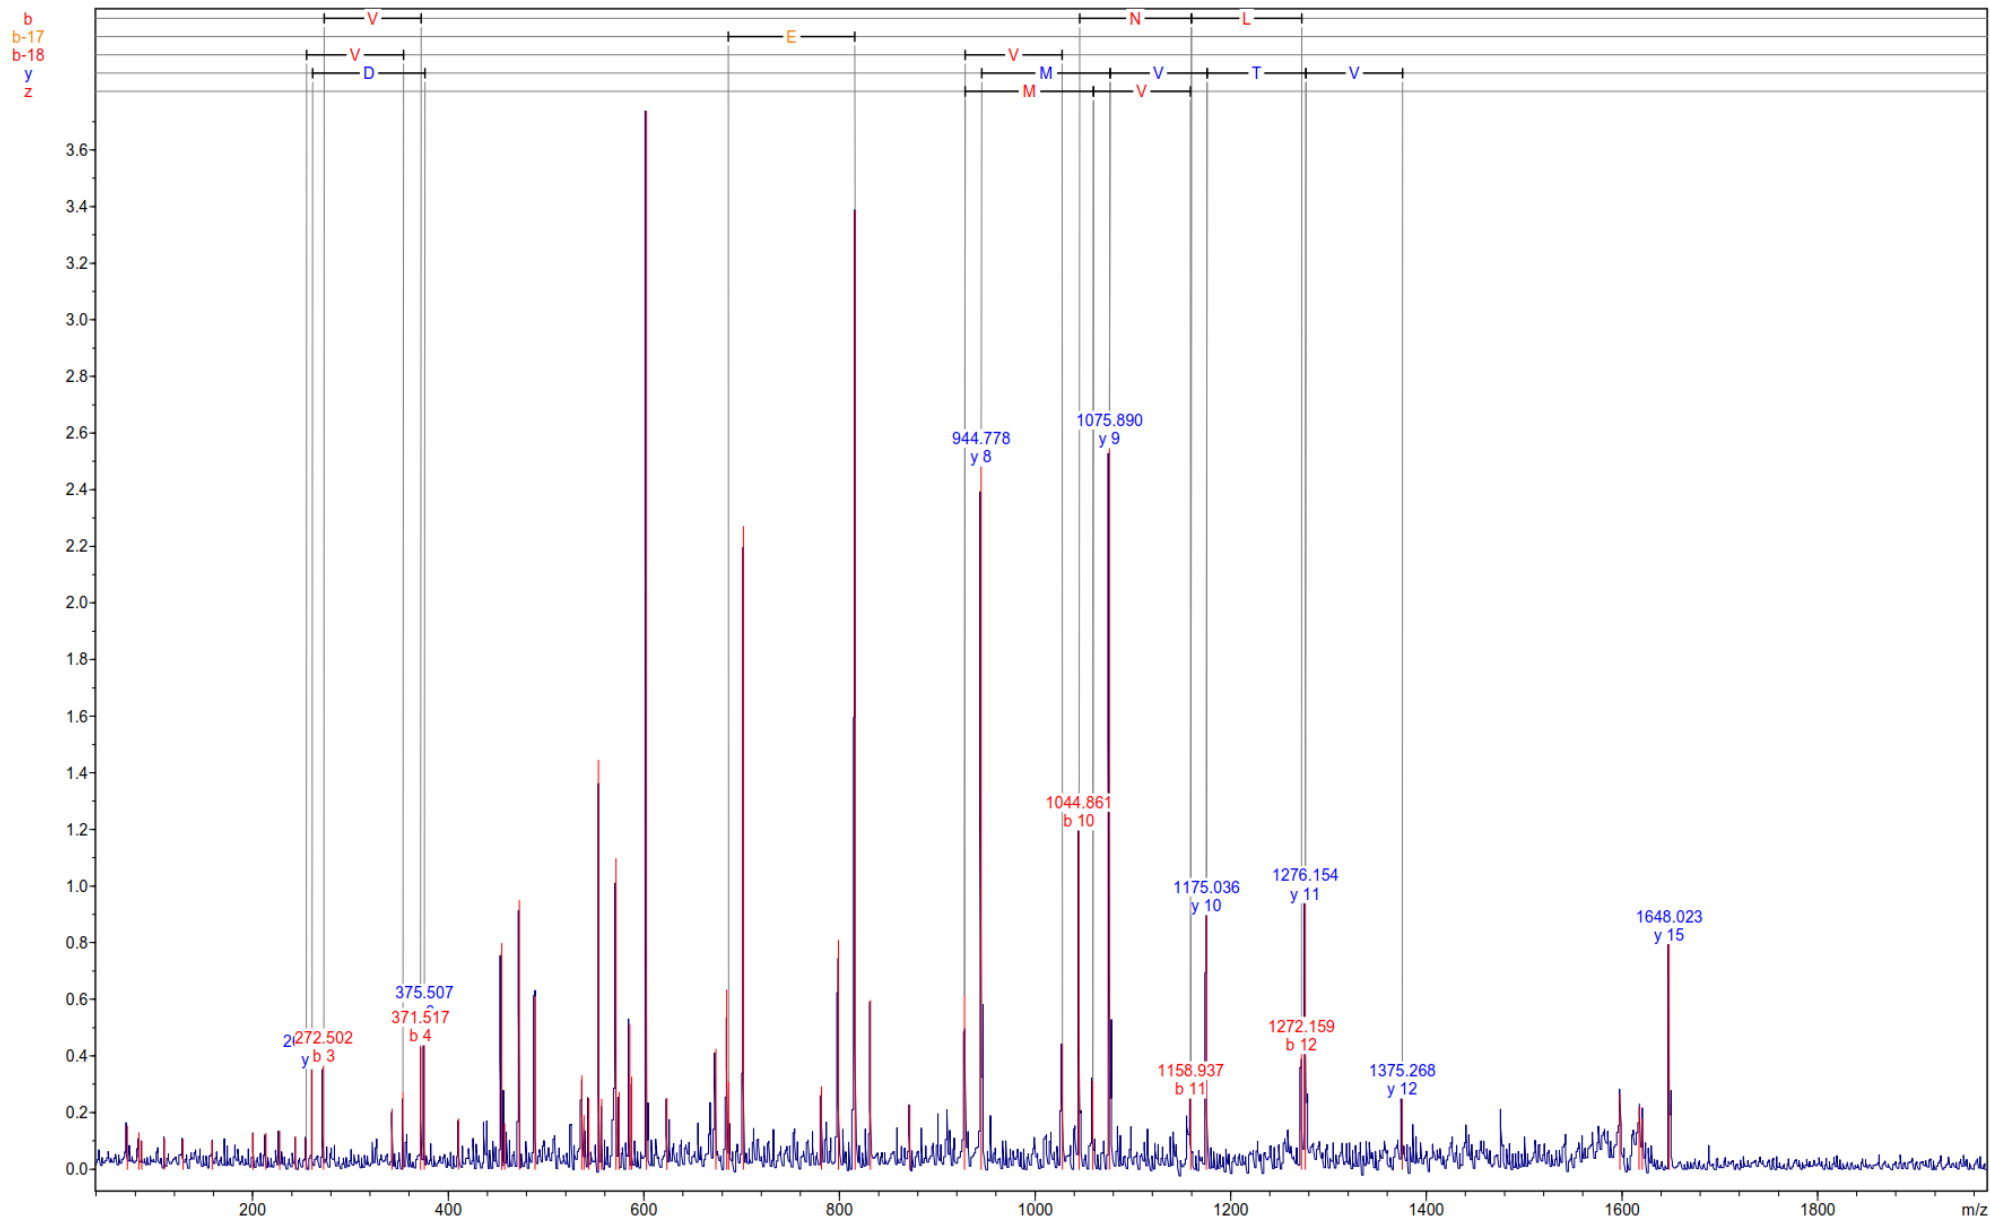

# Spectrum Analysis Report

## Display Parameter:

Parentmass: 1648.000 Mass Error: 0.199 MH+ (mono): 1647.801 MH+ (avg): 1648.818  
 Threshold (a.i.): 0.000 Tolerance (Da): 0.700 Number of Peaks: 57 Above Threshold: 57  
 Assigned Peaks: 26 Not assigned Peaks: 31

## Peaklist:

| Peak | Mass     | Intensity |
|------|----------|-----------|------|----------|-----------|------|----------|-----------|------|----------|-----------|------|----------|-----------|
| 1    | 71.701   | 153.521   | 2    | 83.646   | 129.326   | 3    | 86.640   | 99.898    | 4    | 109.604  | 108.468   | 5    | 128.618  | 106.598   |
| 6    | 158.570  | 98.348    | 7    | 200.557  | 127.623   | 8    | 213.551  | 127.567   | 9    | 227.532  | 133.943   | 10   | 243.515  | 116.409   |
| 11   | 254.523  | 109.147   | 12   | 260.539  | 353.619   | 13   | 272.502  | 365.600   | 14   | 342.503  | 213.325   | 15   | 353.520  | 272.174   |
| 16   | 371.517  | 437.234   | 17   | 375.507  | 522.359   | 18   | 410.479  | 178.861   | 19   | 454.521  | 797.927   | 20   | 457.489  | 161.246   |
| 21   | 472.515  | 949.732   | 22   | 488.550  | 609.998   | 23   | 536.519  | 330.934   | 24   | 538.626  | 190.396   | 25   | 543.587  | 250.492   |
| 26   | 553.560  | 1444.672  | 27   | 556.598  | 247.851   | 28   | 571.563  | 1097.314  | 29   | 574.523  | 271.175   | 30   | 585.514  | 510.408   |
| 31   | 587.522  | 325.809   | 32   | 602.563  | 3785.897  | 33   | 623.546  | 250.666   | 34   | 673.581  | 425.267   | 35   | 684.583  | 633.649   |
| 36   | 686.634  | 310.486   | 37   | 701.627  | 2271.209  | 38   | 781.613  | 291.902   | 39   | 798.639  | 809.697   | 40   | 815.683  | 3387.074  |
| 41   | 831.666  | 596.108   | 42   | 871.633  | 226.805   | 43   | 927.754  | 617.875   | 44   | 944.778  | 2481.937  | 45   | 1027.794 | 443.154   |
| 46   | 1044.861 | 1196.190  | 47   | 1058.839 | 311.853   | 48   | 1075.890 | 2546.124  | 49   | 1158.937 | 248.916   | 50   | 1175.036 | 896.967   |
| 51   | 1272.159 | 405.875   | 52   | 1276.154 | 938.779   | 53   | 1375.268 | 248.876   | 54   | 1597.602 | 264.212   | 55   | 1617.431 | 220.772   |
| 56   | 1620.616 | 179.110   | 57   | 1648.023 | 794.132   |      |          |           |      |          |           |      |          |           |

## Calculated Masses:

GNTVTVMENVNLDNK

| N-Term. | Ion | a        | a-17           | a-18           | b               | b-17            | b-18            | b+18            | c        | i             | x               | y               | z               | C-Term. | Ion |
|---------|-----|----------|----------------|----------------|-----------------|-----------------|-----------------|-----------------|----------|---------------|-----------------|-----------------|-----------------|---------|-----|
| 1       | G   | 30.034   | 13.007         | 12.023         | 58.029          | 41.002          | 40.018          | 76.039          | 75.055   | 30.034        | 173.092         | 147.113         | 130.086         | 15      | K   |
| 2       | N   | 144.077  | 127.050        | 126.066        | 172.072         | 155.045         | 154.061         | 190.082         | 189.098  | <b>87.055</b> | 287.135         | <b>261.156</b>  | <b>244.129</b>  | 14      | N   |
| 3       | T   | 245.124  | <b>228.098</b> | <b>227.114</b> | <b>273.119</b>  | 256.093         | <b>255.109</b>  | 291.130         | 290.146  | 74.060        | 402.162         | <b>376.183</b>  | 359.156         | 13      | D   |
| 4       | V   | 344.193  | 327.166        | 326.182        | <b>372.188</b>  | 355.161         | <b>354.177</b>  | 390.198         | 389.214  | <b>72.081</b> | 515.246         | 489.267         | <b>472.240</b>  | 12      | L   |
| 5       | T   | 445.241  | 428.214        | 427.230        | 473.235         | 456.209         | 455.225         | 491.246         | 490.262  | 74.060        | 629.289         | 603.310         | 586.283         | 11      | N   |
| 6       | V   | 544.309  | 527.282        | 526.298        | 572.304         | 555.277         | 554.293         | 590.314         | 589.330  | <b>72.081</b> | 728.357         | 702.378         | 685.352         | 10      | V   |
| 7       | M   | 675.349  | 658.323        | 657.339        | 703.344         | <b>686.318</b>  | 685.334         | 721.355         | 720.371  | 104.053       | 842.400         | 816.421         | 799.394         | 9       | N   |
| 8       | E   | 804.392  | 787.365        | 786.381        | 832.387         | <b>815.360</b>  | 814.376         | 850.397         | 849.413  | 102.055       | 971.443         | <b>945.464</b>  | <b>928.437</b>  | 8       | E   |
| 9       | N   | 918.435  | 901.408        | 900.424        | 946.430         | 929.403         | <b>928.419</b>  | 964.440         | 963.456  | <b>87.055</b> | 1102.483        | <b>1076.504</b> | <b>1059.478</b> | 7       | M   |
| 10      | V   | 1017.503 | 1000.477       | 999.493        | <b>1045.498</b> | <b>1028.472</b> | <b>1027.488</b> | 1063.509        | 1062.525 | <b>72.081</b> | 1201.552        | <b>1175.572</b> | <b>1158.546</b> | 6       | V   |
| 11      | N   | 1131.546 | 1114.520       | 1113.536       | <b>1159.541</b> | 1142.515        | 1141.531        | 1177.552        | 1176.568 | <b>87.055</b> | 1302.599        | <b>1276.620</b> | 1259.594        | 5       | T   |
| 12      | L   | 1244.630 | 1227.604       | 1226.620       | <b>1272.625</b> | 1255.599        | 1254.615        | 1290.636        | 1289.652 | <b>86.096</b> | 1401.668        | <b>1375.689</b> | 1358.662        | 4       | V   |
| 13      | D   | 1359.657 | 1342.631       | 1341.647       | 1387.652        | 1370.626        | 1369.642        | 1405.663        | 1404.679 | 88.039        | 1502.716        | 1476.736        | 1459.710        | 3       | T   |
| 14      | N   | 1473.700 | 1456.674       | 1455.690       | 1501.695        | 1484.669        | 1483.685        | 1519.706        | 1518.722 | <b>87.055</b> | <b>1616.758</b> | 1590.779        | 1573.753        | 2       | N   |
| 15      | K   | 1601.795 | 1584.769       | 1583.785       | 1629.790        | 1612.764        | 1611.780        | <b>1647.801</b> | 1646.817 | 101.107       | 1673.780        | <b>1647.801</b> | 1630.774        | 1       | G   |

# VNGF parentmass 1415.821

## Spectrum Analysis Report

|                  |          |                   |          |                     |       |                  |          |
|------------------|----------|-------------------|----------|---------------------|-------|------------------|----------|
| Sequence Name:   | 1416.568 | Parentmass:       | 1415.821 | Mass Error:         | 0.205 | MH+ (mono):      | 1415.616 |
| MH+ (avg):       | 1416.568 | Threshold (a.i.): | 0.000    | Tolerance (Da):     | 0.700 | Number of Peaks: | 53       |
| Above Threshold: | 53       | Assigned Peaks:   | 28       | Not assigned Peaks: | 25    |                  |          |

Abs. Int. \* 1000

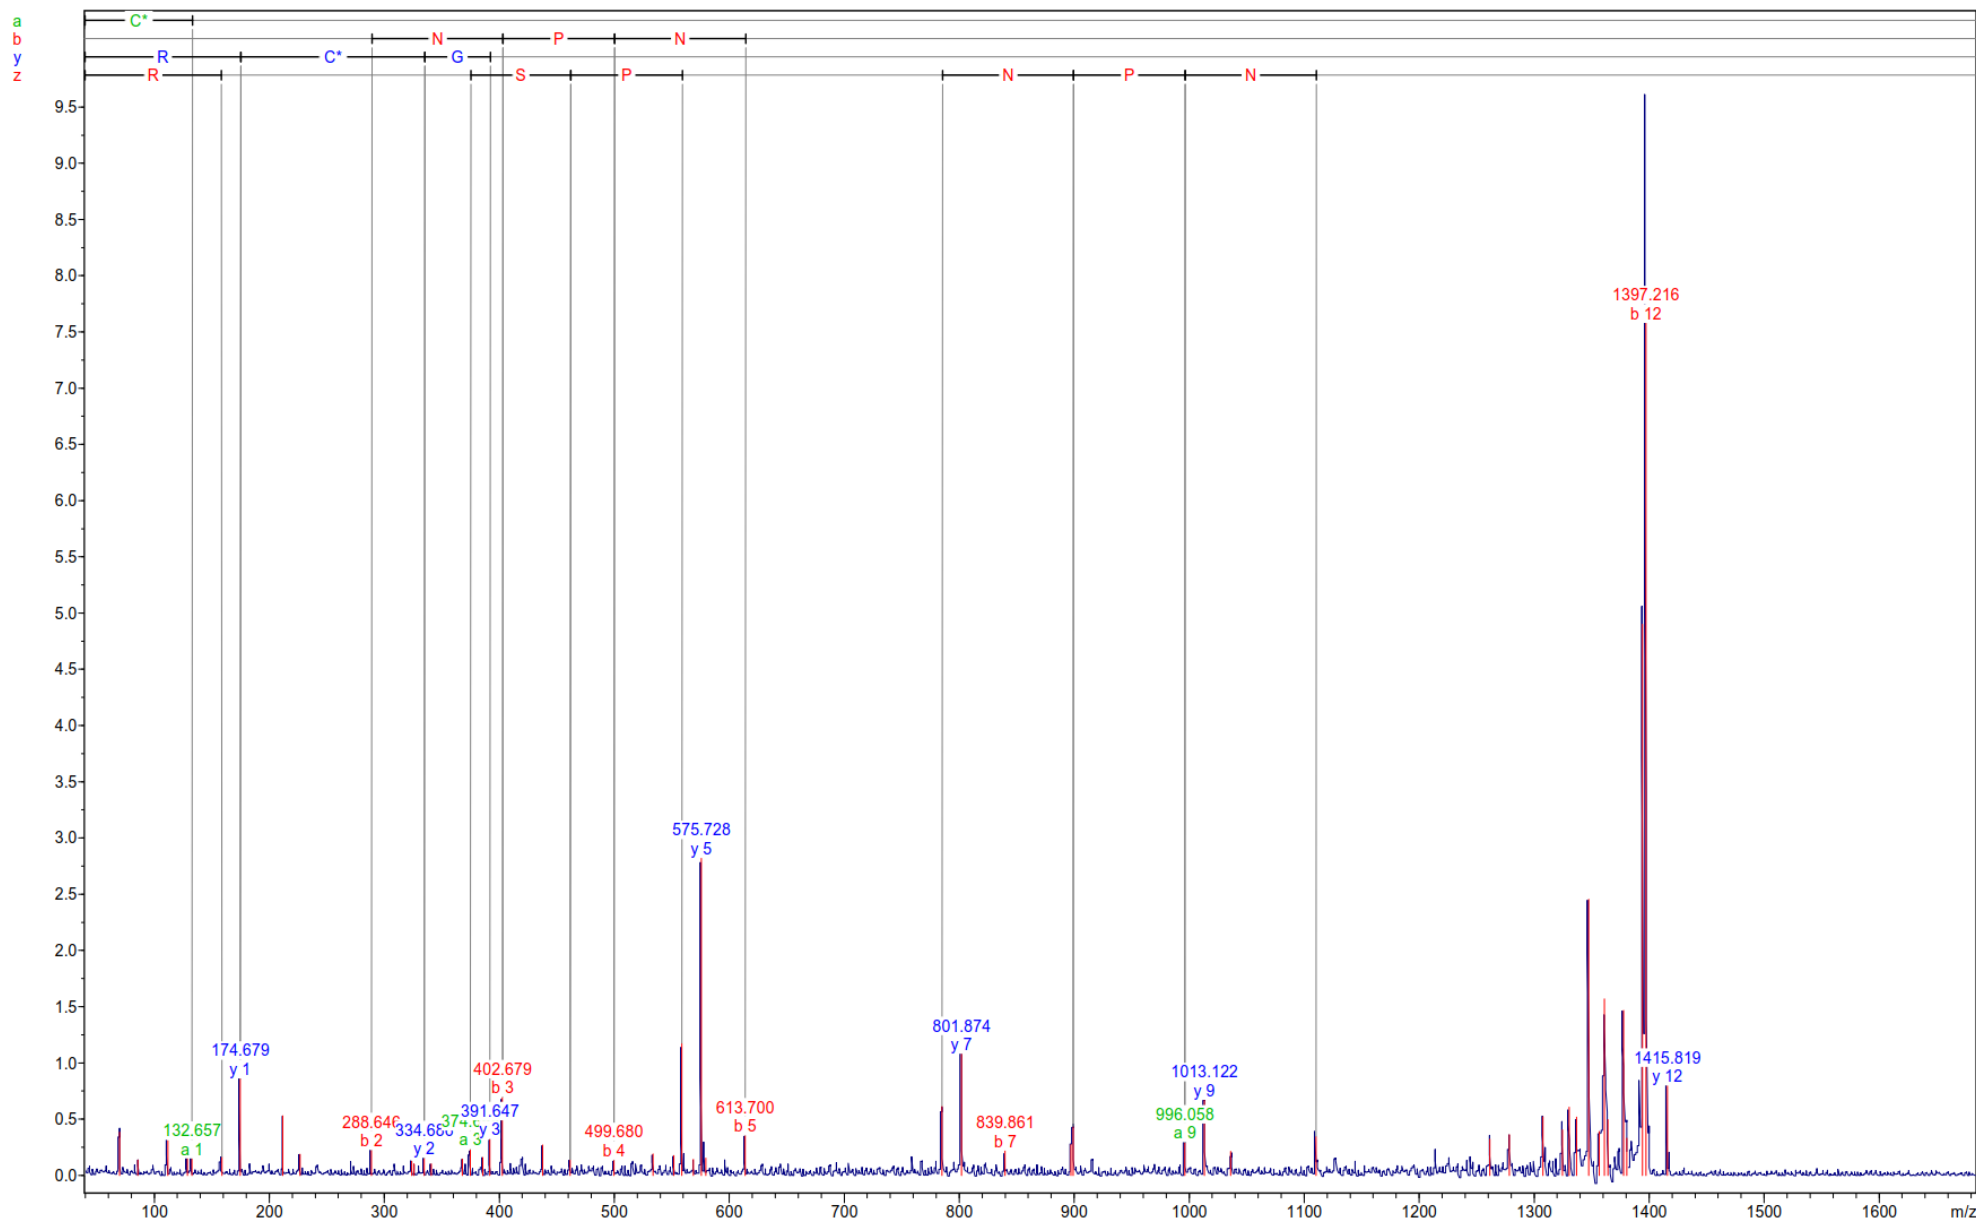

# Spectrum Analysis Report

## Display Parameter:

Parentmass: 1415.821      Mass Error: 0.205      MH+ (mono): 1415.616      MH+ (avg): 1416.568  
Threshold (a.i.): 0.000      Tolerance (Da): 0.700      Number of Peaks: 53      Above Threshold: 53  
Assigned Peaks: 28      Not assigned Peaks: 25

## Peaklist:

| Peak | Mass     | Intensity |
|------|----------|-----------|------|----------|-----------|------|----------|-----------|------|----------|-----------|------|----------|-----------|
| 1    | 69.783   | 385.724   | 2    | 85.715   | 137.374   | 3    | 111.689  | 312.410   | 4    | 128.700  | 231.975   | 5    | 132.657  | 149.088   |
| 6    | 158.658  | 163.609   | 7    | 174.679  | 861.909   | 8    | 211.653  | 529.954   | 9    | 226.648  | 190.542   | 10   | 288.646  | 224.137   |
| 11   | 323.699  | 126.889   | 12   | 325.659  | 103.924   | 13   | 334.686  | 155.279   | 14   | 340.644  | 102.816   | 15   | 367.696  | 147.624   |
| 16   | 374.658  | 231.271   | 17   | 385.647  | 162.008   | 18   | 391.647  | 322.251   | 19   | 402.679  | 694.671   | 20   | 437.700  | 271.705   |
| 21   | 461.614  | 138.860   | 22   | 499.680  | 136.857   | 23   | 533.714  | 191.822   | 24   | 551.751  | 177.763   | 25   | 558.704  | 1174.923  |
| 26   | 568.679  | 142.549   | 27   | 575.728  | 2822.048  | 28   | 579.624  | 154.576   | 29   | 613.700  | 355.785   | 30   | 784.843  | 615.231   |
| 31   | 801.874  | 1079.341  | 32   | 839.861  | 219.460   | 33   | 897.021  | 276.115   | 34   | 898.957  | 435.004   | 35   | 996.058  | 292.727   |
| 36   | 1013.122 | 669.989   | 37   | 1036.080 | 213.804   | 38   | 1110.147 | 344.835   | 39   | 1261.448 | 321.852   | 40   | 1278.288 | 362.147   |
| 41   | 1307.531 | 521.591   | 42   | 1324.579 | 406.852   | 43   | 1330.355 | 607.376   | 44   | 1336.659 | 520.079   | 45   | 1347.473 | 2455.322  |
| 46   | 1356.511 | 392.379   | 47   | 1361.107 | 1570.874  | 48   | 1364.177 | 496.463   | 49   | 1377.587 | 1468.881  | 50   | 1380.441 | 330.896   |
| 51   | 1394.166 | 4901.564  | 52   | 1397.216 | 7579.544  | 53   | 1415.819 | 798.953   |      |          |           |      |          |           |

## Calculated Masses:

CKNPNPEPSGCR 1: Carbamidomethyl (C) 11: Carbamidomethyl (C)

| N-Term. | Ion | a        | a-17     | a-18     | b        | b-17     | b-18     | b+18     | c        | i       | x        | y        | z        | C-Term. | Ion |
|---------|-----|----------|----------|----------|----------|----------|----------|----------|----------|---------|----------|----------|----------|---------|-----|
| 1       | C*  | 133.043  | 116.016  | 115.032  | 161.038  | 144.011  | 143.027  | 179.048  | 178.064  | 133.043 | 201.098  | 175.119  | 158.092  | 12      | R   |
| 2       | K   | 261.138  | 244.111  | 243.127  | 289.133  | 272.106  | 271.122  | 307.143  | 306.159  | 101.107 | 361.129  | 335.150  | 318.123  | 11      | C*  |
| 3       | N   | 375.181  | 358.154  | 357.170  | 403.176  | 386.149  | 385.165  | 421.186  | 420.202  | 87.055  | 418.150  | 392.171  | 375.145  | 10      | G   |
| 4       | P   | 472.234  | 455.207  | 454.223  | 500.229  | 483.202  | 482.218  | 518.239  | 517.255  | 70.065  | 505.182  | 479.203  | 462.177  | 9       | S   |
| 5       | N   | 586.277  | 569.250  | 568.266  | 614.272  | 597.245  | 596.261  | 632.282  | 631.298  | 87.055  | 602.235  | 576.256  | 559.229  | 8       | P   |
| 6       | P   | 683.329  | 666.303  | 665.319  | 711.324  | 694.298  | 693.314  | 729.335  | 728.351  | 70.065  | 731.278  | 705.298  | 688.272  | 7       | E   |
| 7       | E   | 812.372  | 795.345  | 794.361  | 840.367  | 823.340  | 822.356  | 858.377  | 857.393  | 102.055 | 828.330  | 802.351  | 785.325  | 6       | P   |
| 8       | P   | 909.425  | 892.398  | 891.414  | 937.420  | 920.393  | 919.409  | 955.430  | 954.446  | 70.065  | 942.373  | 916.394  | 899.368  | 5       | N   |
| 9       | S   | 996.457  | 979.430  | 978.446  | 1024.452 | 1007.425 | 1006.441 | 1042.462 | 1041.478 | 60.044  | 1039.426 | 1013.447 | 996.420  | 4       | P   |
| 10      | G   | 1053.478 | 1036.452 | 1035.468 | 1081.473 | 1064.447 | 1063.463 | 1099.484 | 1098.500 | 30.034  | 1153.469 | 1127.490 | 1110.463 | 3       | N   |
| 11      | C*  | 1213.509 | 1196.482 | 1195.498 | 1241.504 | 1224.477 | 1223.493 | 1259.514 | 1258.530 | 133.043 | 1281.564 | 1255.585 | 1238.558 | 2       | K   |
| 12      | R   | 1369.610 | 1352.583 | 1351.599 | 1397.605 | 1380.578 | 1379.594 | 1415.615 | 1414.631 | 129.113 | 1441.595 | 1415.615 | 1398.589 | 1       | C*  |

# VNGF parentmass 962.627

## Spectrum Analysis Report

|                  |         |                   |         |                     |       |                  |         |
|------------------|---------|-------------------|---------|---------------------|-------|------------------|---------|
| Sequence Name:   | 963.066 | Parentmass:       | 962.627 | Mass Error:         | 0.164 | MH+ (mono):      | 962.462 |
| MH+ (avg):       | 963.066 | Threshold (a.i.): | 0.000   | Tolerance (Da):     | 0.700 | Number of Peaks: | 40      |
| Above Threshold: | 40      | Assigned Peaks:   | 27      | Not assigned Peaks: | 13    |                  |         |

Abs. Int. \* 1000

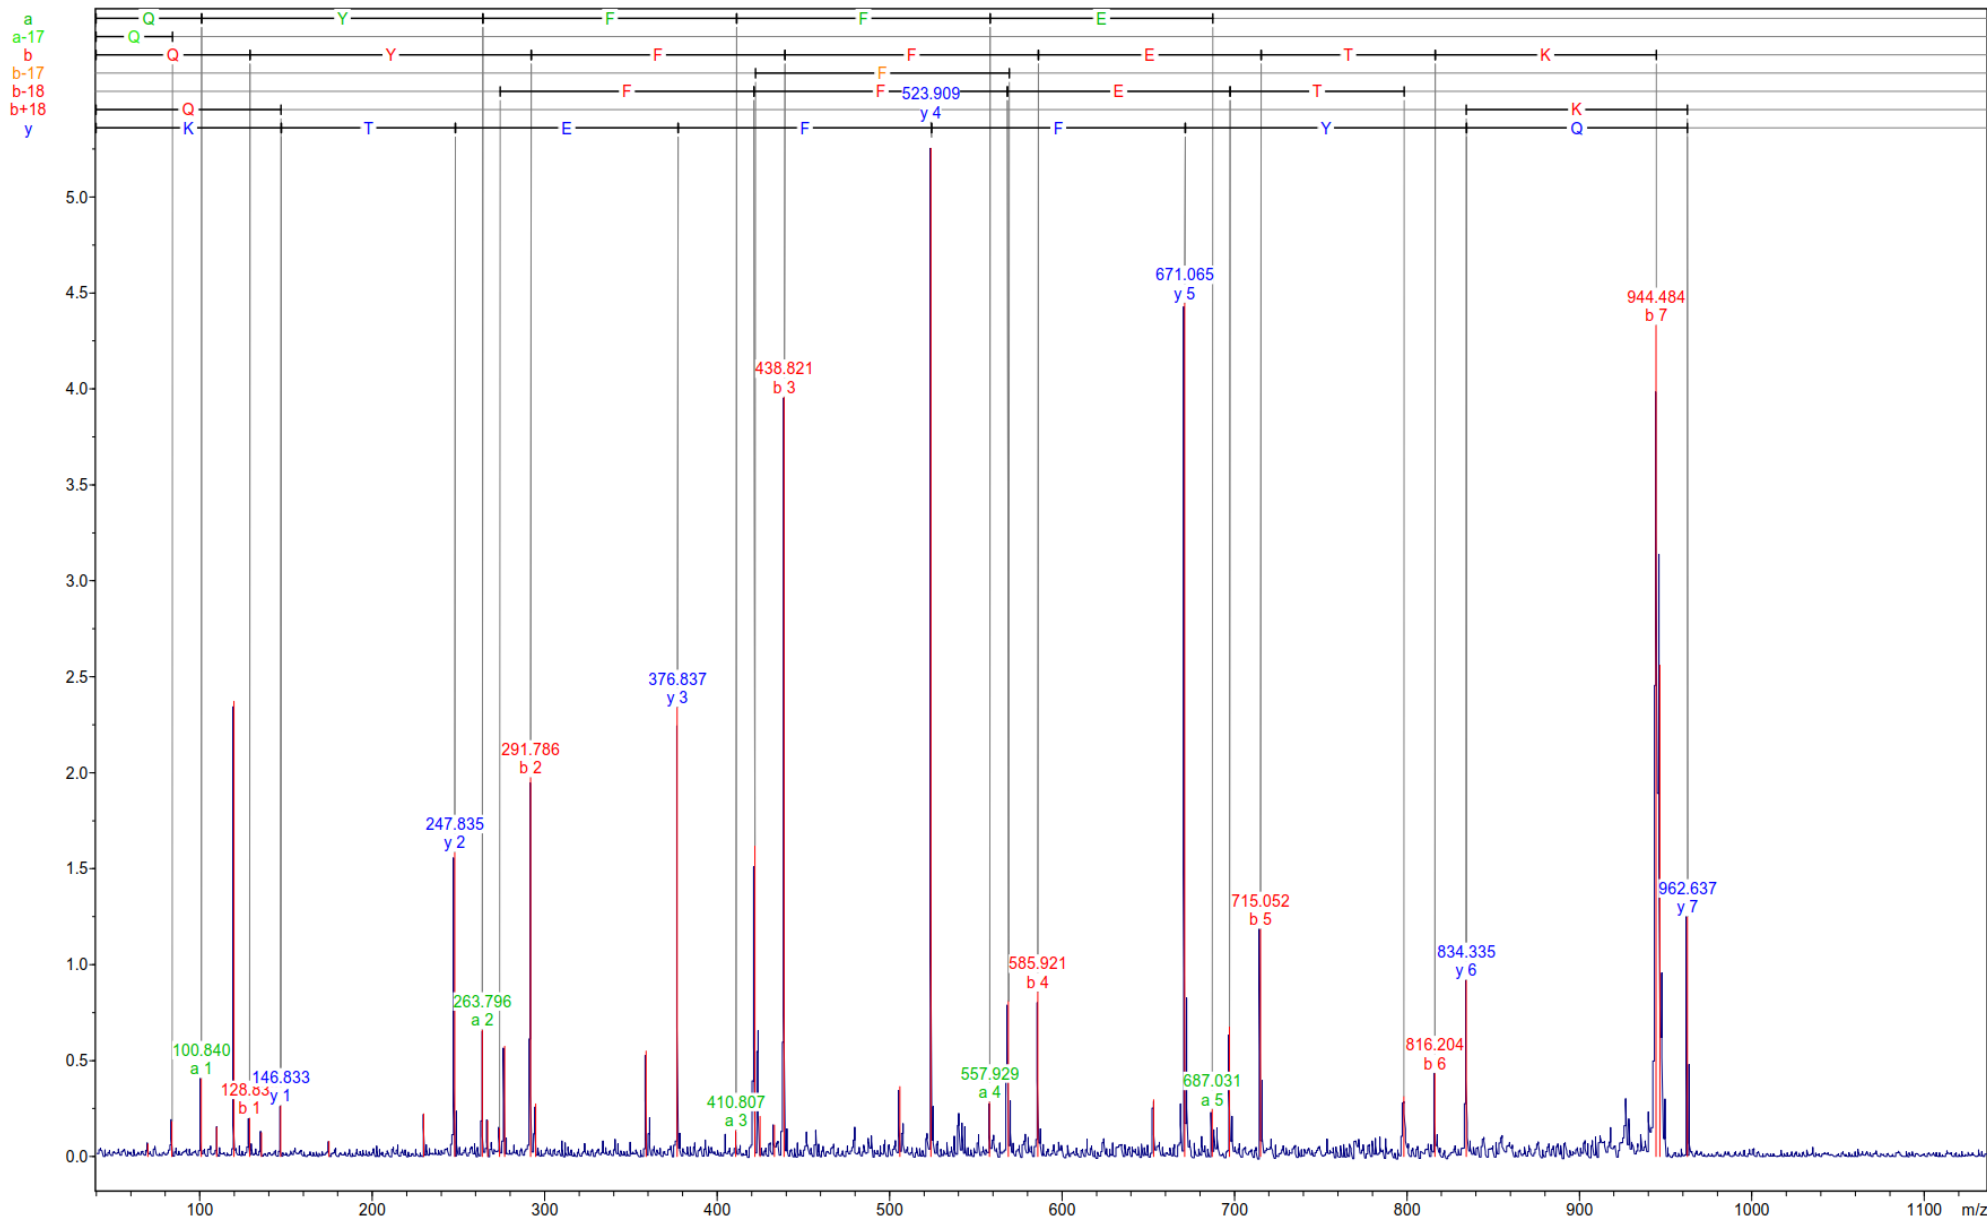

## Spectrum Analysis Report

### Display Parameter:

|                   |         |                     |       |                  |         |                  |         |
|-------------------|---------|---------------------|-------|------------------|---------|------------------|---------|
| Parentmass:       | 962.627 | Mass Error:         | 0.164 | MH+ (mono):      | 962.462 | MH+ (avg):       | 963.066 |
| Threshold (a.i.): | 0.000   | Tolerance (Da):     | 0.700 | Number of Peaks: | 40      | Above Threshold: | 40      |
| Assigned Peaks:   | 27      | Not assigned Peaks: | 13    |                  |         |                  |         |

### Peaklist:

| Peak | Mass    | Intensity |
|------|---------|-----------|------|---------|-----------|------|---------|-----------|------|---------|-----------|------|---------|-----------|
| 1    | 69.849  | 65.667    | 2    | 83.856  | 184.813   | 3    | 100.840 | 409.010   | 4    | 109.836 | 152.857   | 5    | 119.836 | 2371.761  |
| 6    | 128.838 | 200.649   | 7    | 135.816 | 125.041   | 8    | 146.833 | 266.892   | 9    | 174.840 | 79.989    | 10   | 229.821 | 223.193   |
| 11   | 247.835 | 1585.986  | 12   | 263.796 | 662.591   | 13   | 266.897 | 187.946   | 14   | 273.775 | 149.455   | 15   | 276.792 | 575.231   |
| 16   | 291.786 | 1974.939  | 17   | 294.800 | 274.451   | 18   | 358.819 | 549.471   | 19   | 376.837 | 2342.052  | 20   | 410.807 | 138.672   |
| 21   | 421.807 | 1621.130  | 22   | 424.817 | 209.274   | 23   | 433.140 | 164.150   | 24   | 438.821 | 3959.105  | 25   | 505.878 | 365.295   |
| 26   | 523.909 | 5391.345  | 27   | 557.929 | 286.228   | 28   | 568.903 | 811.209   | 29   | 585.921 | 858.940   | 30   | 653.024 | 296.832   |
| 31   | 671.065 | 4449.365  | 32   | 687.031 | 247.740   | 33   | 697.037 | 678.241   | 34   | 715.052 | 1186.543  | 35   | 798.169 | 313.725   |
| 36   | 816.204 | 435.130   | 37   | 834.335 | 919.998   | 38   | 944.484 | 4332.823  | 39   | 946.572 | 2560.058  | 40   | 962.637 | 1251.340  |

### Calculated Masses:

QYFFETK

| N-Term. | Ion | a       | a-17    | a-18    | b       | b-17    | b-18    | b+18    | c       | i       | x       | y       | z       | C-Term. | Ion |
|---------|-----|---------|---------|---------|---------|---------|---------|---------|---------|---------|---------|---------|---------|---------|-----|
| 1       | Q   | 101.071 | 84.044  | 83.060  | 129.066 | 112.039 | 111.055 | 147.076 | 146.092 | 101.071 | 173.092 | 147.113 | 130.086 | 7       | K   |
| 2       | Y   | 264.134 | 247.108 | 246.124 | 292.129 | 275.103 | 274.119 | 310.140 | 309.156 | 136.076 | 274.140 | 248.160 | 231.134 | 6       | T   |
| 3       | F   | 411.203 | 394.176 | 393.192 | 439.198 | 422.171 | 421.187 | 457.208 | 456.224 | 120.081 | 403.182 | 377.203 | 360.177 | 5       | E   |
| 4       | F   | 558.271 | 541.245 | 540.261 | 586.266 | 569.239 | 568.255 | 604.277 | 603.293 | 120.081 | 550.251 | 524.271 | 507.245 | 4       | F   |
| 5       | E   | 687.314 | 670.287 | 669.303 | 715.309 | 698.282 | 697.298 | 733.319 | 732.335 | 102.055 | 697.319 | 671.340 | 654.313 | 3       | F   |
| 6       | T   | 788.361 | 771.335 | 770.351 | 816.356 | 799.330 | 798.346 | 834.367 | 833.383 | 74.060  | 860.382 | 834.403 | 817.377 | 2       | Y   |
| 7       | K   | 916.456 | 899.430 | 898.446 | 944.451 | 927.425 | 926.441 | 962.462 | 961.478 | 101.107 | 988.441 | 962.462 | 945.435 | 1       | Q   |

# VNGF parentmass 1363.885

## Spectrum Analysis Report

|                  |          |                   |          |                     |       |                  |          |
|------------------|----------|-------------------|----------|---------------------|-------|------------------|----------|
| Sequence Name:   | 1364.511 | Parentmass:       | 1363.885 | Mass Error:         | 0.242 | MH+ (mono):      | 1363.643 |
| MH+ (avg):       | 1364.511 | Threshold (a.i.): | 0.000    | Tolerance (Da):     | 0.700 | Number of Peaks: | 99       |
| Above Threshold: | 99       | Assigned Peaks:   | 44       | Not assigned Peaks: | 55    |                  |          |

Abs. Int. \* 1000

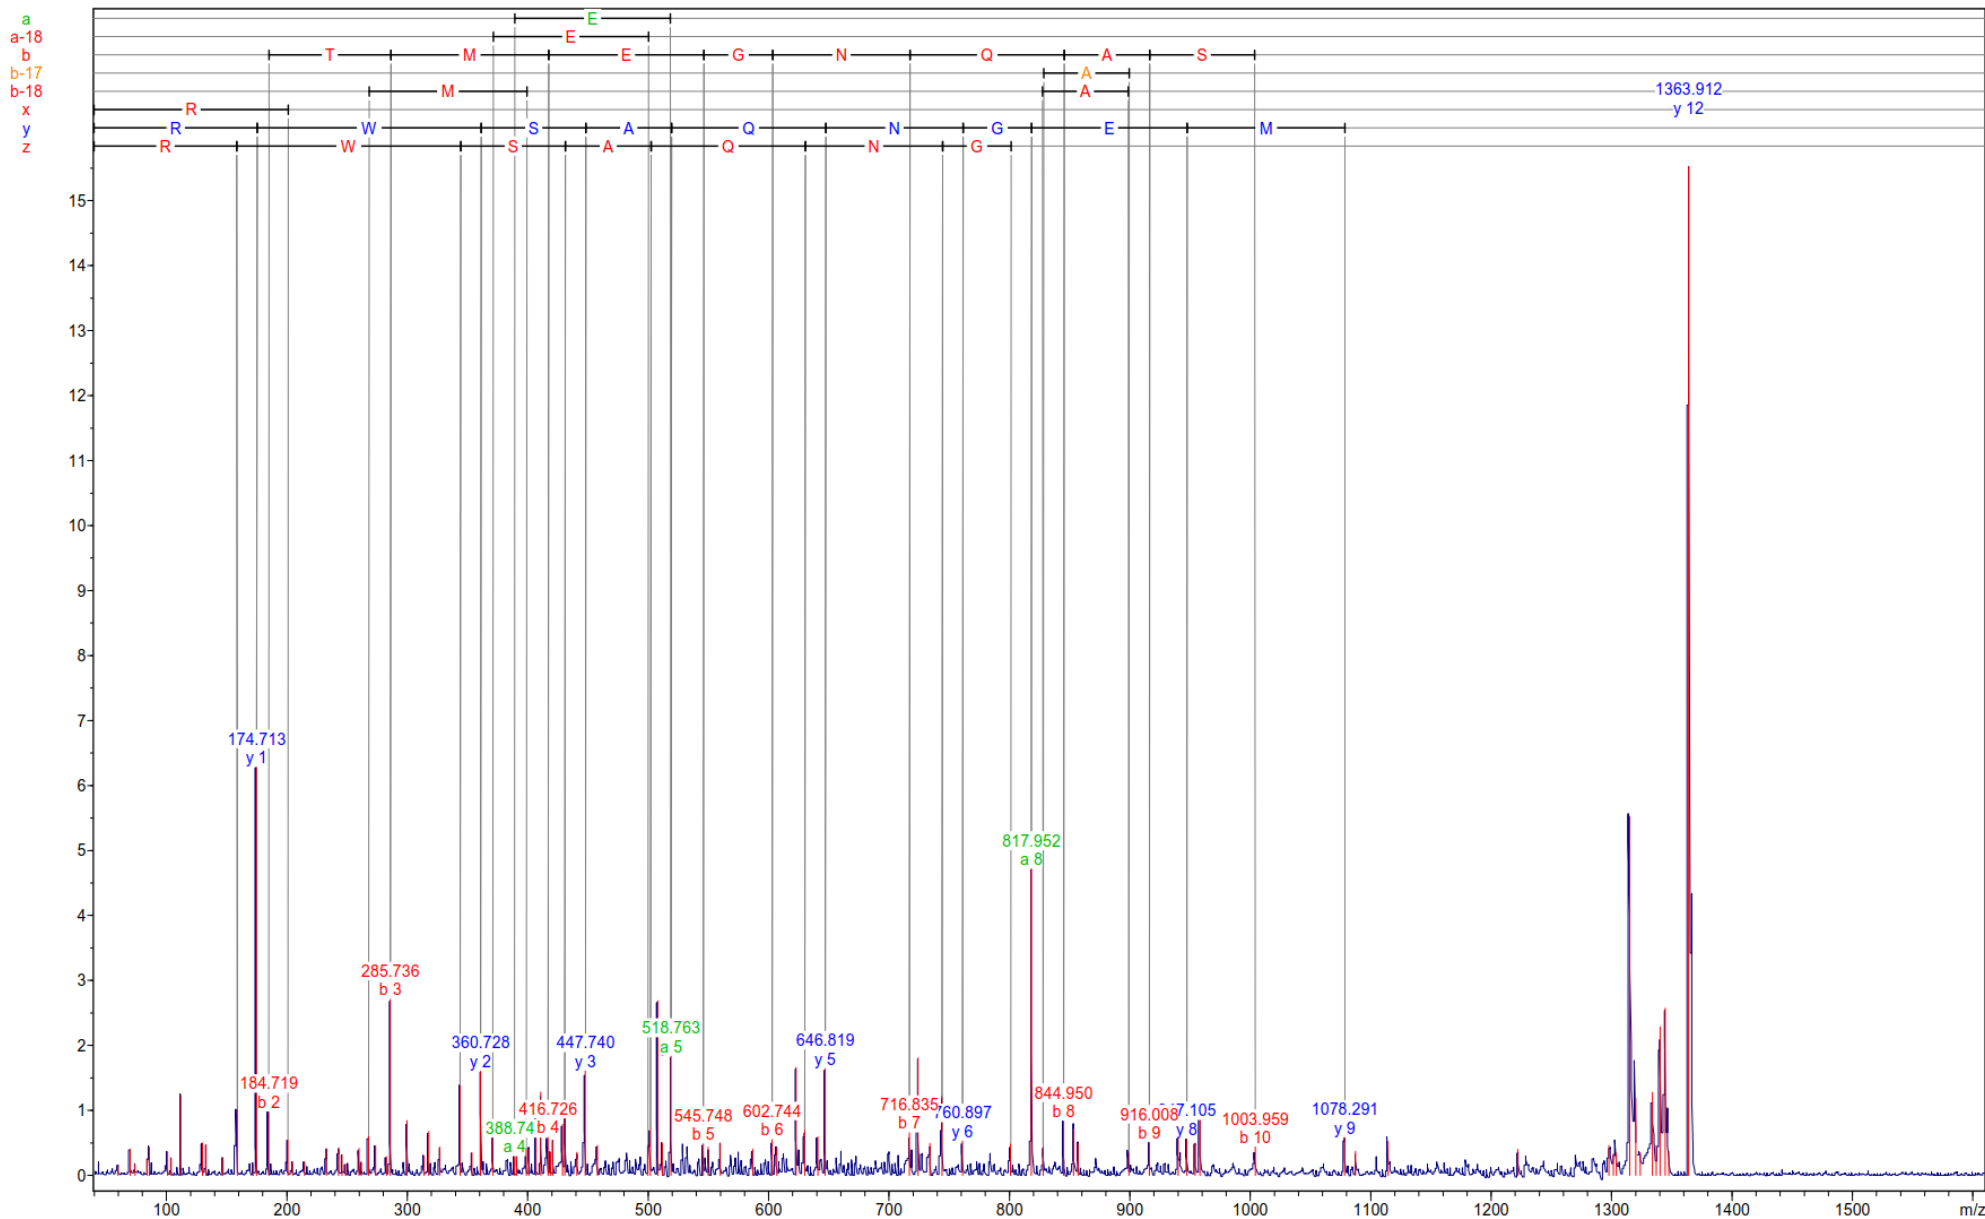

# Spectrum Analysis Report

## Display Parameter:

Parentmass: 1363.885      Mass Error: 0.242      MH+ (mono): 1363.643      MH+ (avg): 1364.511  
 Threshold (a.i.): 0.000      Tolerance (Da): 0.700      Number of Peaks: 99      Above Threshold: 99  
 Assigned Peaks: 44      Not assigned Peaks: 55

## Peaklist:

| Peak | Mass     | Intensity |
|------|----------|-----------|------|----------|-----------|------|----------|-----------|------|----------|-----------|------|----------|-----------|
| 1    | 59.755   | 154.898   | 2    | 69.749   | 408.953   | 3    | 73.749   | 177.308   | 4    | 83.725   | 237.192   | 5    | 85.777   | 432.796   |
| 6    | 100.722  | 367.575   | 7    | 103.722  | 260.742   | 8    | 111.727  | 1231.692  | 9    | 129.705  | 501.376   | 10   | 132.686  | 464.074   |
| 11   | 146.719  | 269.422   | 12   | 158.699  | 1020.170  | 13   | 171.679  | 185.367   | 14   | 174.713  | 6287.204  | 15   | 184.719  | 984.628   |
| 16   | 200.676  | 544.351   | 17   | 204.685  | 205.052   | 18   | 214.687  | 211.494   | 19   | 232.699  | 413.387   | 20   | 242.688  | 424.485   |
| 21   | 245.699  | 317.940   | 22   | 248.690  | 172.774   | 23   | 259.753  | 415.796   | 24   | 261.668  | 203.298   | 25   | 267.713  | 610.157   |
| 26   | 273.683  | 456.056   | 27   | 282.669  | 290.072   | 28   | 285.736  | 2715.039  | 29   | 299.688  | 846.245   | 30   | 313.701  | 301.440   |
| 31   | 317.687  | 677.067   | 32   | 326.686  | 434.654   | 33   | 343.708  | 1391.046  | 34   | 353.675  | 346.124   | 35   | 360.728  | 1607.308  |
| 36   | 370.720  | 756.351   | 37   | 388.741  | 292.983   | 38   | 390.651  | 333.995   | 39   | 398.743  | 415.889   | 40   | 400.739  | 399.485   |
| 41   | 406.782  | 1007.369  | 42   | 410.672  | 1284.913  | 43   | 416.726  | 588.453   | 44   | 418.695  | 355.081   | 45   | 420.709  | 540.792   |
| 46   | 428.697  | 785.966   | 47   | 430.715  | 1140.125  | 48   | 440.704  | 356.741   | 49   | 447.740  | 1607.475  | 50   | 457.709  | 462.334   |
| 51   | 499.729  | 476.076   | 52   | 501.736  | 727.610   | 53   | 507.802  | 2686.618  | 54   | 511.683  | 498.577   | 55   | 518.763  | 1839.571  |
| 56   | 545.748  | 488.816   | 57   | 549.706  | 434.554   | 58   | 559.735  | 497.346   | 59   | 586.796  | 407.344   | 60   | 602.744  | 558.673   |
| 61   | 606.688  | 427.853   | 62   | 622.782  | 1660.915  | 63   | 629.776  | 710.941   | 64   | 640.733  | 594.906   | 65   | 646.819  | 1646.801  |
| 66   | 716.835  | 659.923   | 67   | 723.872  | 1811.374  | 68   | 733.822  | 495.415   | 69   | 743.857  | 1196.180  | 70   | 760.897  | 529.308   |
| 71   | 800.874  | 484.194   | 72   | 817.952  | 4718.366  | 73   | 827.924  | 450.692   | 74   | 844.950  | 839.740   | 75   | 852.987  | 717.003   |
| 76   | 856.849  | 485.840   | 77   | 899.022  | 356.707   | 78   | 916.008  | 512.600   | 79   | 940.006  | 640.633   | 80   | 947.105  | 564.602   |
| 81   | 954.200  | 493.025   | 82   | 957.996  | 941.137   | 83   | 1003.959 | 442.508   | 84   | 1078.291 | 584.060   | 85   | 1087.192 | 370.295   |
| 86   | 1114.424 | 531.190   | 87   | 1221.875 | 403.858   | 88   | 1297.707 | 462.525   | 89   | 1301.385 | 330.754   | 90   | 1303.653 | 341.883   |
| 91   | 1314.918 | 5526.804  | 92   | 1319.943 | 1188.828  | 93   | 1323.720 | 356.031   | 94   | 1333.752 | 1277.820  | 95   | 1336.915 | 461.855   |
| 96   | 1340.095 | 2290.538  | 97   | 1344.379 | 2575.757  | 98   | 1347.339 | 374.142   | 99   | 1363.912 | 16283.677 |      |          |           |

## Calculated Masses:

ALTMEGNQASWR

| N-Term. | Ion | a        | a-17     | a-18     | b        | b-17     | b-18     | b+18     | c        | i       | x        | y        | z        | C-Term. | Ion |
|---------|-----|----------|----------|----------|----------|----------|----------|----------|----------|---------|----------|----------|----------|---------|-----|
| 1       | A   | 44.049   | 27.023   | 26.039   | 72.044   | 55.018   | 54.034   | 90.055   | 89.071   | 44.049  | 201.098  | 175.119  | 158.092  | 12      | R   |
| 2       | L   | 157.134  | 140.107  | 139.123  | 185.128  | 168.102  | 167.118  | 203.139  | 202.155  | 86.096  | 387.178  | 361.198  | 344.172  | 11      | W   |
| 3       | T   | 258.181  | 241.155  | 240.171  | 286.176  | 269.150  | 268.166  | 304.187  | 303.203  | 74.060  | 474.210  | 448.230  | 431.204  | 10      | S   |
| 4       | M   | 389.222  | 372.195  | 371.211  | 417.217  | 400.190  | 399.206  | 435.227  | 434.243  | 104.053 | 545.247  | 519.267  | 502.241  | 9       | A   |
| 5       | E   | 518.264  | 501.238  | 500.254  | 546.259  | 529.233  | 528.249  | 564.270  | 563.286  | 102.055 | 673.305  | 647.326  | 630.299  | 8       | Q   |
| 6       | G   | 575.286  | 558.259  | 557.275  | 603.281  | 586.254  | 585.270  | 621.291  | 620.307  | 30.034  | 787.348  | 761.369  | 744.342  | 7       | N   |
| 7       | N   | 689.329  | 672.302  | 671.318  | 717.324  | 700.297  | 699.313  | 735.334  | 734.350  | 87.055  | 844.370  | 818.390  | 801.364  | 6       | G   |
| 8       | Q   | 817.387  | 800.361  | 799.377  | 845.382  | 828.356  | 827.372  | 863.393  | 862.409  | 101.071 | 973.412  | 947.433  | 930.406  | 5       | E   |
| 9       | A   | 888.424  | 871.398  | 870.414  | 916.419  | 899.393  | 898.409  | 934.430  | 933.446  | 44.049  | 1104.453 | 1078.473 | 1061.447 | 4       | M   |
| 10      | S   | 975.456  | 958.430  | 957.446  | 1003.451 | 986.425  | 985.441  | 1021.462 | 1020.478 | 60.044  | 1205.500 | 1179.521 | 1162.495 | 3       | T   |
| 11      | W   | 1161.536 | 1144.509 | 1143.525 | 1189.531 | 1172.504 | 1171.520 | 1207.541 | 1206.557 | 159.092 | 1318.584 | 1292.605 | 1275.579 | 2       | L   |
| 12      | R   | 1317.637 | 1300.610 | 1299.626 | 1345.632 | 1328.605 | 1327.621 | 1363.642 | 1362.658 | 129.113 | 1389.622 | 1363.642 | 1346.616 | 1       | A   |

# VNGF parentmass 379.914

## Spectrum Analysis Report

|                  |                   |          |                     |       |                  |          |
|------------------|-------------------|----------|---------------------|-------|------------------|----------|
| Sequence Name:   | Parentmass:       | 1379.914 | Mass Error:         | 0.277 | MH+ (mono):      | 1379.638 |
| MH+ (avg):       | Threshold (a.i.): | 0.000    | Tolerance (Da):     | 0.700 | Number of Peaks: | 90       |
| Above Threshold: | Assigned Peaks:   | 34       | Not assigned Peaks: | 56    |                  |          |

Abs. Int. \* 1000

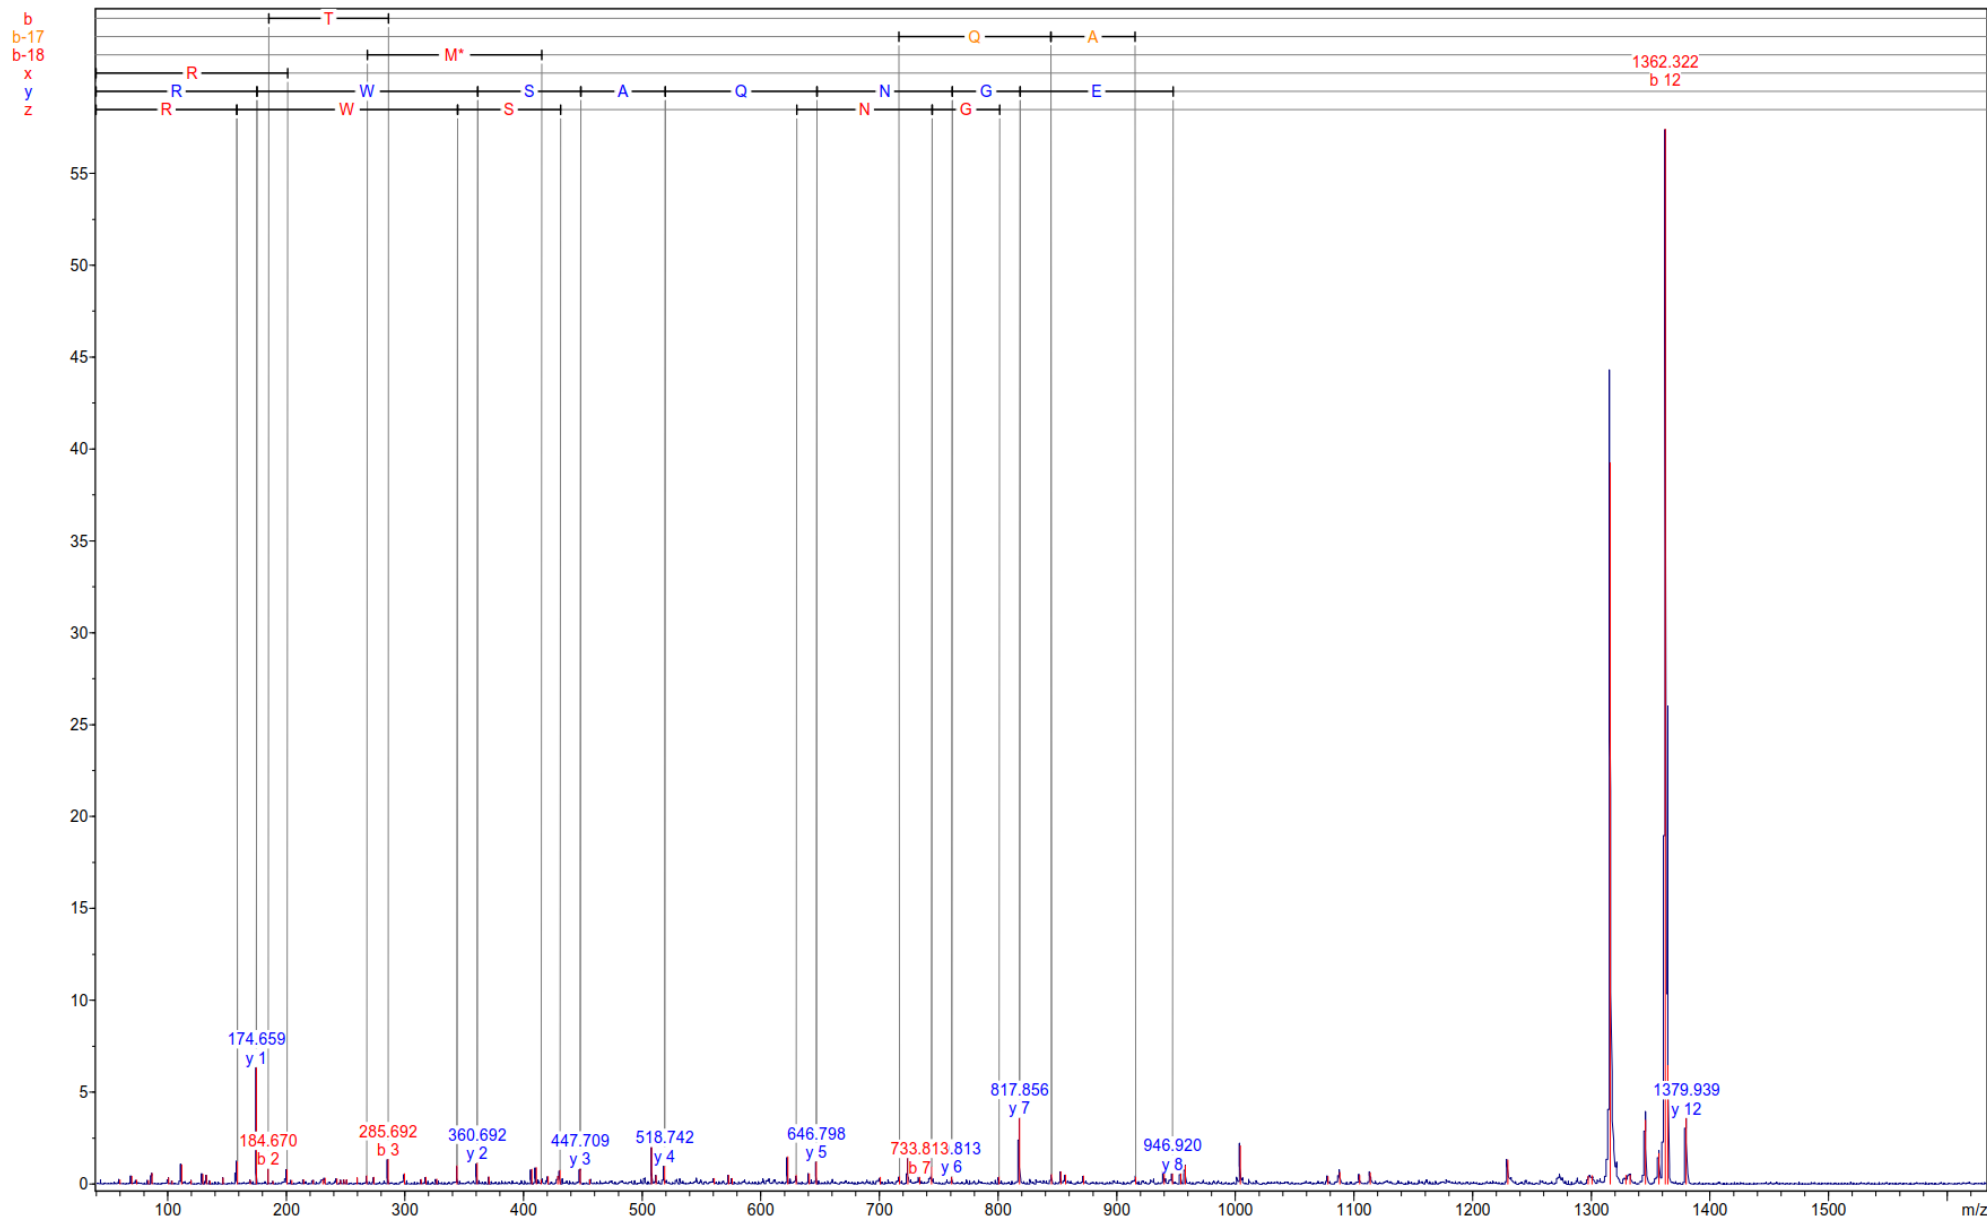

# Spectrum Analysis Report

## Display Parameter:

Parentmass: 1379.914 Mass Error: 0.277 MH+ (mono): 1379.638 MH+ (avg): 1380.510  
 Threshold (a.i.): 0.000 Tolerance (Da): 0.700 Number of Peaks: 90 Above Threshold: 90  
 Assigned Peaks: 34 Not assigned Peaks: 56

## Peaklist:

| Peak | Mass     | Intensity |
|------|----------|-----------|------|----------|-----------|------|----------|-----------|------|----------|-----------|------|----------|-----------|
| 1    | 59.753   | 234.888   | 2    | 69.707   | 431.089   | 3    | 73.728   | 223.213   | 4    | 83.675   | 197.758   | 5    | 86.707   | 587.942   |
| 6    | 100.666  | 337.872   | 7    | 103.655  | 161.204   | 8    | 111.674  | 1058.664  | 9    | 119.678  | 192.273   | 10   | 129.672  | 535.452   |
| 11   | 132.619  | 481.771   | 12   | 135.629  | 165.587   | 13   | 146.659  | 338.051   | 14   | 158.651  | 1243.681  | 15   | 169.631  | 208.327   |
| 16   | 174.659  | 6344.863  | 17   | 184.670  | 830.065   | 18   | 188.638  | 146.813   | 19   | 200.626  | 813.705   | 20   | 204.647  | 197.834   |
| 21   | 214.645  | 232.619   | 22   | 222.626  | 200.575   | 23   | 230.621  | 239.032   | 24   | 232.636  | 329.828   | 25   | 242.629  | 295.583   |
| 26   | 245.630  | 205.354   | 27   | 248.643  | 232.634   | 28   | 250.623  | 228.530   | 29   | 259.712  | 359.841   | 30   | 267.685  | 462.024   |
| 31   | 273.648  | 374.310   | 32   | 285.692  | 1347.184  | 33   | 299.650  | 573.080   | 34   | 313.658  | 246.028   | 35   | 317.646  | 372.277   |
| 36   | 326.661  | 269.251   | 37   | 343.672  | 1013.881  | 38   | 360.692  | 1164.816  | 39   | 370.686  | 399.272   | 40   | 406.761  | 808.216   |
| 41   | 410.623  | 898.653   | 42   | 414.678  | 259.124   | 43   | 420.659  | 412.558   | 44   | 428.691  | 434.554   | 45   | 430.684  | 758.374   |
| 46   | 447.709  | 841.407   | 47   | 455.671  | 260.083   | 48   | 507.803  | 2317.344  | 49   | 511.676  | 463.694   | 50   | 518.742  | 977.635   |
| 51   | 560.696  | 308.524   | 52   | 572.728  | 486.174   | 53   | 575.673  | 311.613   | 54   | 622.792  | 1493.390  | 55   | 629.778  | 499.935   |
| 56   | 640.747  | 574.744   | 57   | 646.798  | 1232.216  | 58   | 700.729  | 370.967   | 59   | 716.817  | 432.937   | 60   | 723.832  | 1776.491  |
| 61   | 733.813  | 400.730   | 62   | 743.820  | 954.852   | 63   | 760.813  | 402.738   | 64   | 800.783  | 406.190   | 65   | 817.856  | 3601.916  |
| 66   | 844.846  | 555.016   | 67   | 852.855  | 672.320   | 68   | 856.754  | 491.604   | 69   | 871.823  | 439.102   | 70   | 915.829  | 406.400   |
| 71   | 939.771  | 740.499   | 72   | 946.920  | 572.721   | 73   | 953.851  | 595.929   | 74   | 957.752  | 1006.548  | 75   | 1004.079 | 2082.750  |
| 76   | 1077.889 | 407.951   | 77   | 1088.037 | 643.929   | 78   | 1104.725 | 482.352   | 79   | 1113.673 | 618.638   | 80   | 1229.617 | 1311.033  |
| 81   | 1297.406 | 428.935   | 82   | 1300.475 | 466.365   | 83   | 1315.891 | 39261.850 | 84   | 1329.066 | 484.924   | 85   | 1332.509 | 491.629   |
| 86   | 1345.568 | 3475.931  | 87   | 1356.987 | 1660.047  | 88   | 1362.322 | 59536.639 | 89   | 1364.564 | 6457.740  | 90   | 1379.939 | 3590.383  |

## Calculated Masses:

ALTMEGNQASWR 4: Oxidation (M)

| N-Term. | Ion | a        | a-17     | a-18     | b        | b-17     | b-18     | b+18     | c        | i       | x        | y        | z        | C-Term. | Ion |
|---------|-----|----------|----------|----------|----------|----------|----------|----------|----------|---------|----------|----------|----------|---------|-----|
| 1       | A   | 44.049   | 27.023   | 26.039   | 72.044   | 55.018   | 54.034   | 90.055   | 89.071   | 44.049  | 201.098  | 175.119  | 158.092  | 12      | R   |
| 2       | L   | 157.134  | 140.107  | 139.123  | 185.128  | 168.102  | 167.118  | 203.139  | 202.155  | 86.096  | 387.178  | 361.198  | 344.172  | 11      | W   |
| 3       | T   | 258.181  | 241.155  | 240.171  | 286.176  | 269.150  | 268.166  | 304.187  | 303.203  | 74.060  | 474.210  | 448.230  | 431.204  | 10      | S   |
| 4       | M*  | 405.217  | 388.190  | 387.206  | 433.212  | 416.185  | 415.201  | 451.222  | 450.238  | 120.048 | 545.247  | 519.267  | 502.241  | 9       | A   |
| 5       | E   | 534.259  | 517.233  | 516.249  | 562.254  | 545.228  | 544.244  | 580.265  | 579.281  | 102.055 | 673.305  | 647.326  | 630.299  | 8       | Q   |
| 6       | G   | 591.281  | 574.254  | 573.270  | 619.276  | 602.249  | 601.265  | 637.286  | 636.302  | 30.034  | 787.348  | 761.369  | 744.342  | 7       | N   |
| 7       | N   | 705.324  | 688.297  | 687.313  | 733.319  | 716.292  | 715.308  | 751.329  | 750.345  | 87.055  | 844.370  | 818.390  | 801.364  | 6       | G   |
| 8       | Q   | 833.382  | 816.356  | 815.372  | 861.377  | 844.351  | 843.367  | 879.388  | 878.404  | 101.071 | 973.412  | 947.433  | 930.406  | 5       | E   |
| 9       | A   | 904.419  | 887.393  | 886.409  | 932.414  | 915.388  | 914.404  | 950.425  | 949.441  | 44.049  | 1120.448 | 1094.468 | 1077.442 | 4       | M*  |
| 10      | S   | 991.451  | 974.425  | 973.441  | 1019.446 | 1002.420 | 1001.436 | 1037.457 | 1036.473 | 60.044  | 1221.495 | 1195.516 | 1178.489 | 3       | T   |
| 11      | W   | 1177.531 | 1160.504 | 1159.520 | 1205.526 | 1188.499 | 1187.515 | 1223.536 | 1222.552 | 159.092 | 1334.579 | 1308.600 | 1291.574 | 2       | L   |
| 12      | R   | 1333.632 | 1316.605 | 1315.621 | 1361.627 | 1344.600 | 1343.616 | 1379.637 | 1378.653 | 129.113 | 1405.616 | 1379.637 | 1362.611 | 1       | A   |

## 3FTx parentmass 1302.807

## Spectrum Analysis Report

|                  |          |                   |          |                     |       |                  |          |
|------------------|----------|-------------------|----------|---------------------|-------|------------------|----------|
| Sequence Name:   | 1303.555 | Parentmass:       | 1302.807 | Mass Error:         | 0.140 | MH+ (mono):      | 1302.667 |
| MH+ (avg):       | 1303.555 | Threshold (a.i.): | 0.000    | Tolerance (Da):     | 0.700 | Number of Peaks: | 54       |
| Above Threshold: | 54       | Assigned Peaks:   | 34       | Not assigned Peaks: | 20    |                  |          |

Abs. Int. \* 1000

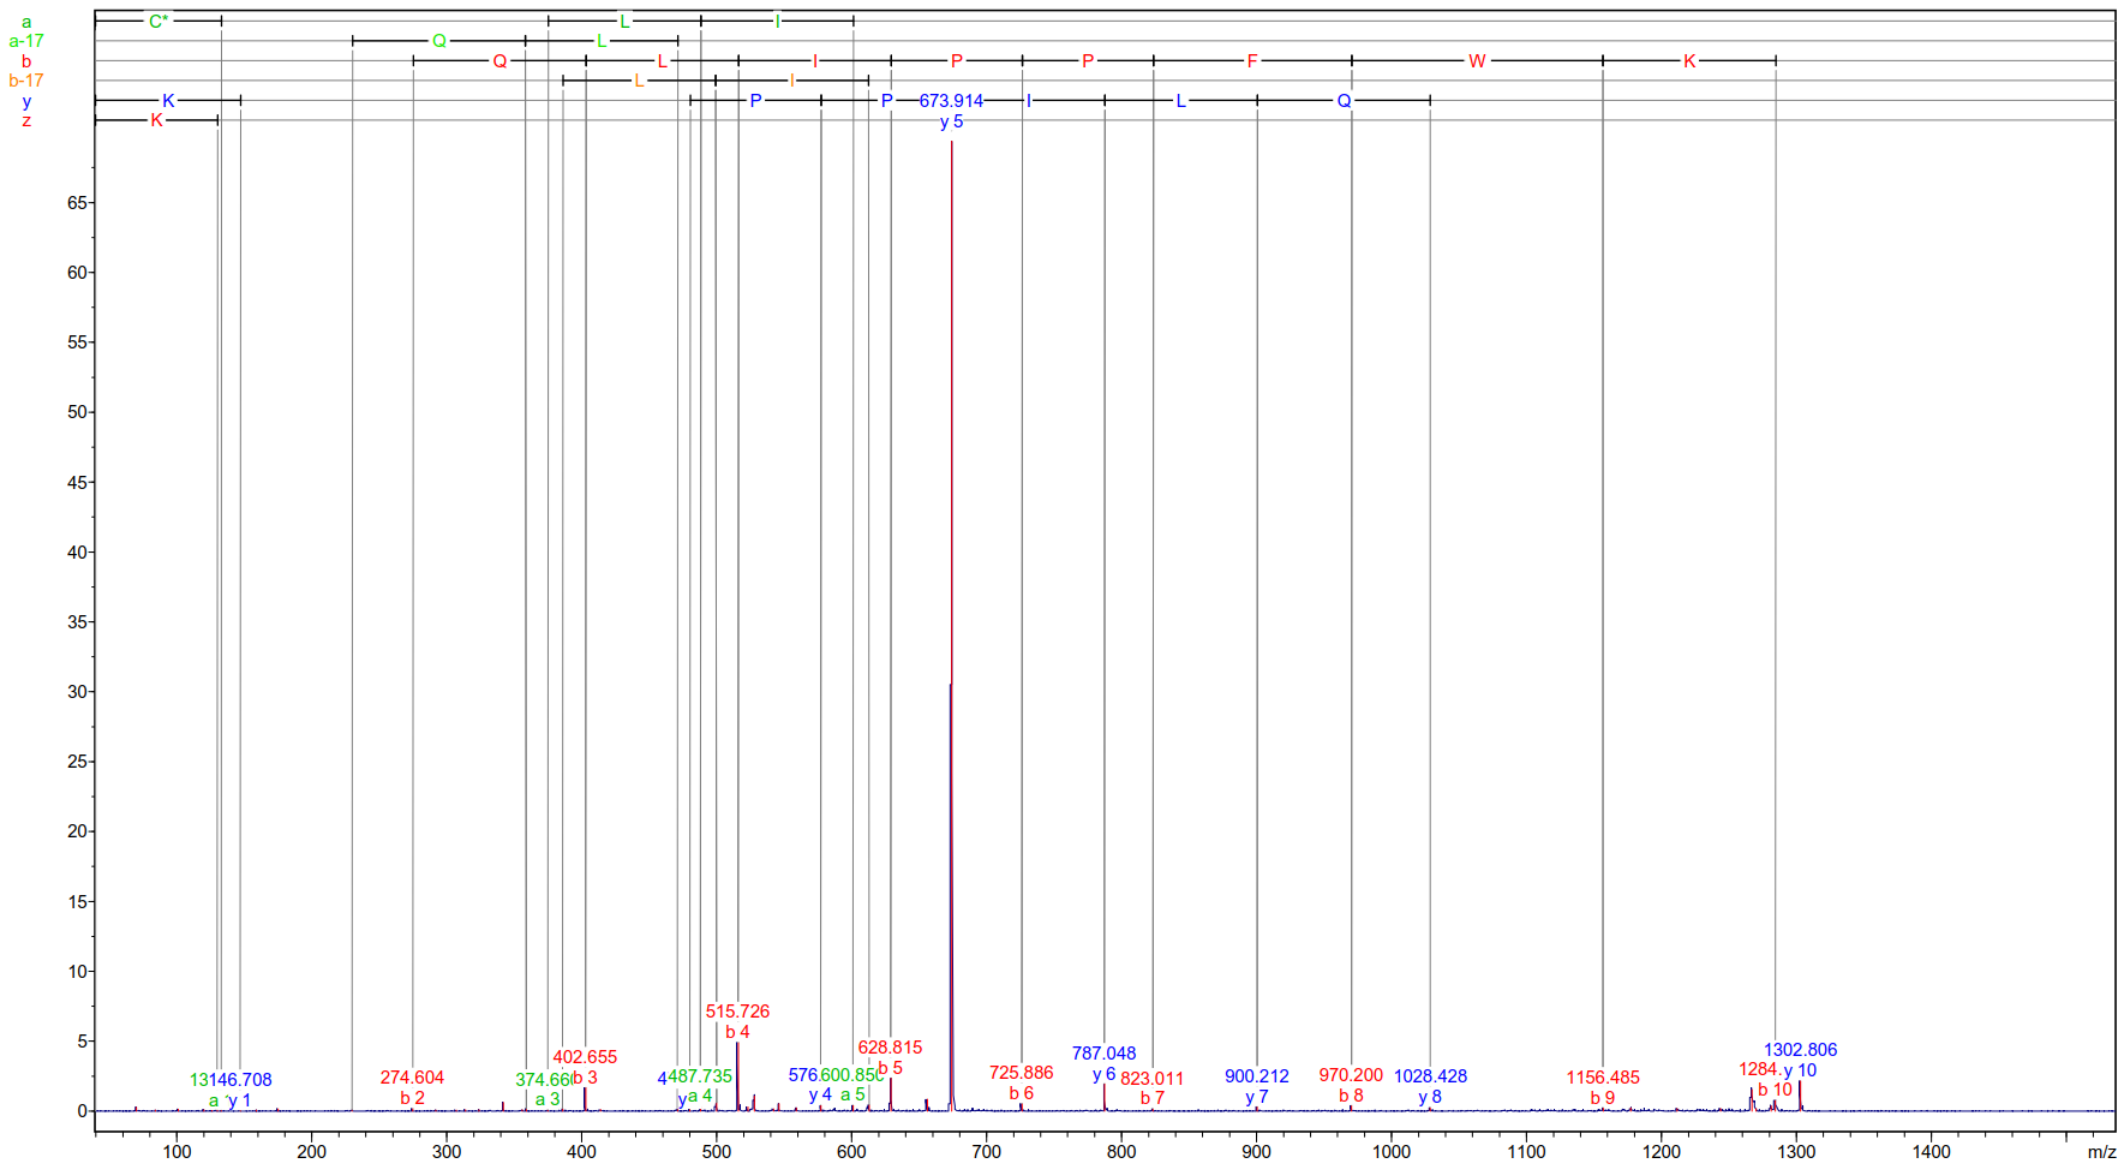

## Spectrum Analysis Report

### Display Parameter:

|                   |          |                     |       |                  |          |                  |          |
|-------------------|----------|---------------------|-------|------------------|----------|------------------|----------|
| Parentmass:       | 1302.807 | Mass Error:         | 0.140 | MH+ (mono):      | 1302.667 | MH+ (avg):       | 1303.555 |
| Threshold (a.i.): | 0.000    | Tolerance (Da):     | 0.700 | Number of Peaks: | 54       | Above Threshold: | 54       |
| Assigned Peaks:   | 34       | Not assigned Peaks: | 20    |                  |          |                  |          |

### Peaklist:

| Peak | Mass     | Intensity |
|------|----------|-----------|------|----------|-----------|------|----------|-----------|------|----------|-----------|------|----------|-----------|
| 1    | 69.755   | 291.205   | 2    | 83.707   | 76.950    | 3    | 100.734  | 142.313   | 4    | 119.685  | 111.635   | 5    | 125.673  | 52.285    |
| 6    | 129.672  | 128.983   | 7    | 132.671  | 64.678    | 8    | 146.708  | 57.730    | 9    | 158.697  | 78.669    | 10   | 174.686  | 161.095   |
| 11   | 229.620  | 83.155    | 12   | 274.604  | 203.376   | 13   | 291.684  | 77.309    | 14   | 306.687  | 73.347    | 15   | 313.735  | 106.003   |
| 16   | 323.671  | 104.895   | 17   | 341.684  | 640.027   | 18   | 355.706  | 93.162    | 19   | 358.712  | 175.740   | 20   | 374.660  | 96.246    |
| 21   | 385.664  | 178.751   | 22   | 402.655  | 1707.760  | 23   | 413.671  | 114.938   | 24   | 470.748  | 134.801   | 25   | 479.791  | 147.972   |
| 26   | 487.735  | 346.735   | 27   | 499.762  | 599.767   | 28   | 515.726  | 4932.536  | 29   | 522.815  | 316.984   | 30   | 527.742  | 1095.929  |
| 31   | 541.956  | 174.918   | 32   | 545.792  | 536.729   | 33   | 558.725  | 234.355   | 34   | 576.833  | 449.419   | 35   | 600.850  | 430.786   |
| 36   | 612.829  | 441.751   | 37   | 628.815  | 2393.001  | 38   | 655.890  | 857.043   | 39   | 673.914  | 70136.875 | 40   | 725.886  | 565.651   |
| 41   | 787.048  | 1974.516  | 42   | 823.011  | 193.415   | 43   | 900.212  | 327.368   | 44   | 970.200  | 420.351   | 45   | 1028.428 | 270.838   |
| 46   | 1156.485 | 262.403   | 47   | 1176.898 | 229.067   | 48   | 1211.272 | 205.371   | 49   | 1243.506 | 192.627   | 50   | 1266.704 | 1537.940  |
| 51   | 1269.777 | 200.859   | 52   | 1281.070 | 382.895   | 53   | 1284.186 | 796.225   | 54   | 1302.806 | 2180.585  |      |          |           |

### Calculated Masses:

CNQLIPPFWK 1: Carbamidomethyl (C)

| N-Term. | Ion | a        | a-17     | a-18     | b        | b-17     | b-18     | b+18     | c        | i       | x        | y        | z        | C-Term. | Ion |
|---------|-----|----------|----------|----------|----------|----------|----------|----------|----------|---------|----------|----------|----------|---------|-----|
| 1       | C*  | 133.043  | 116.016  | 115.032  | 161.038  | 144.011  | 143.027  | 179.048  | 178.064  | 133.043 | 173.092  | 147.113  | 130.086  | 10      | K   |
| 2       | N   | 247.086  | 230.059  | 229.075  | 275.081  | 258.054  | 257.070  | 293.091  | 292.107  | 87.055  | 359.171  | 333.192  | 316.166  | 9       | W   |
| 3       | Q   | 375.145  | 358.118  | 357.134  | 403.139  | 386.113  | 385.129  | 421.150  | 420.166  | 101.071 | 506.240  | 480.261  | 463.234  | 8       | F   |
| 4       | L   | 488.229  | 471.202  | 470.218  | 516.223  | 499.197  | 498.213  | 534.234  | 533.250  | 86.096  | 603.293  | 577.313  | 560.287  | 7       | P   |
| 5       | I   | 601.313  | 584.286  | 583.302  | 629.308  | 612.281  | 611.297  | 647.318  | 646.334  | 86.096  | 700.345  | 674.366  | 657.340  | 6       | P   |
| 6       | P   | 698.365  | 681.339  | 680.355  | 726.360  | 709.334  | 708.350  | 744.371  | 743.387  | 70.065  | 813.429  | 787.450  | 770.424  | 5       | I   |
| 7       | P   | 795.418  | 778.392  | 777.408  | 823.413  | 806.387  | 805.403  | 841.424  | 840.440  | 70.065  | 926.513  | 900.534  | 883.508  | 4       | L   |
| 8       | F   | 942.487  | 925.460  | 924.476  | 970.481  | 953.455  | 952.471  | 988.492  | 987.508  | 120.081 | 1054.572 | 1028.593 | 1011.566 | 3       | Q   |
| 9       | W   | 1128.566 | 1111.539 | 1110.555 | 1156.561 | 1139.534 | 1138.550 | 1174.571 | 1173.587 | 159.092 | 1168.615 | 1142.636 | 1125.609 | 2       | N   |
| 10      | K   | 1256.661 | 1239.634 | 1238.650 | 1284.656 | 1267.629 | 1266.645 | 1302.666 | 1301.682 | 101.107 | 1328.646 | 1302.666 | 1285.640 | 1       | C*  |

## 3FTx parentmass 1091.463

## Spectrum Analysis Report

|                  |          |                   |          |                     |       |                  |          |
|------------------|----------|-------------------|----------|---------------------|-------|------------------|----------|
| Sequence Name:   |          | Parentmass:       | 1091.463 | Mass Error:         | 0.067 | MH+ (mono):      | 1091.396 |
| MH+ (avg):       | 1092.253 | Threshold (a.i.): | 0.000    | Tolerance (Da):     | 0.700 | Number of Peaks: | 46       |
| Above Threshold: | 46       | Assigned Peaks:   | 18       | Not assigned Peaks: | 28    |                  |          |

Abs. Int. \* 1000

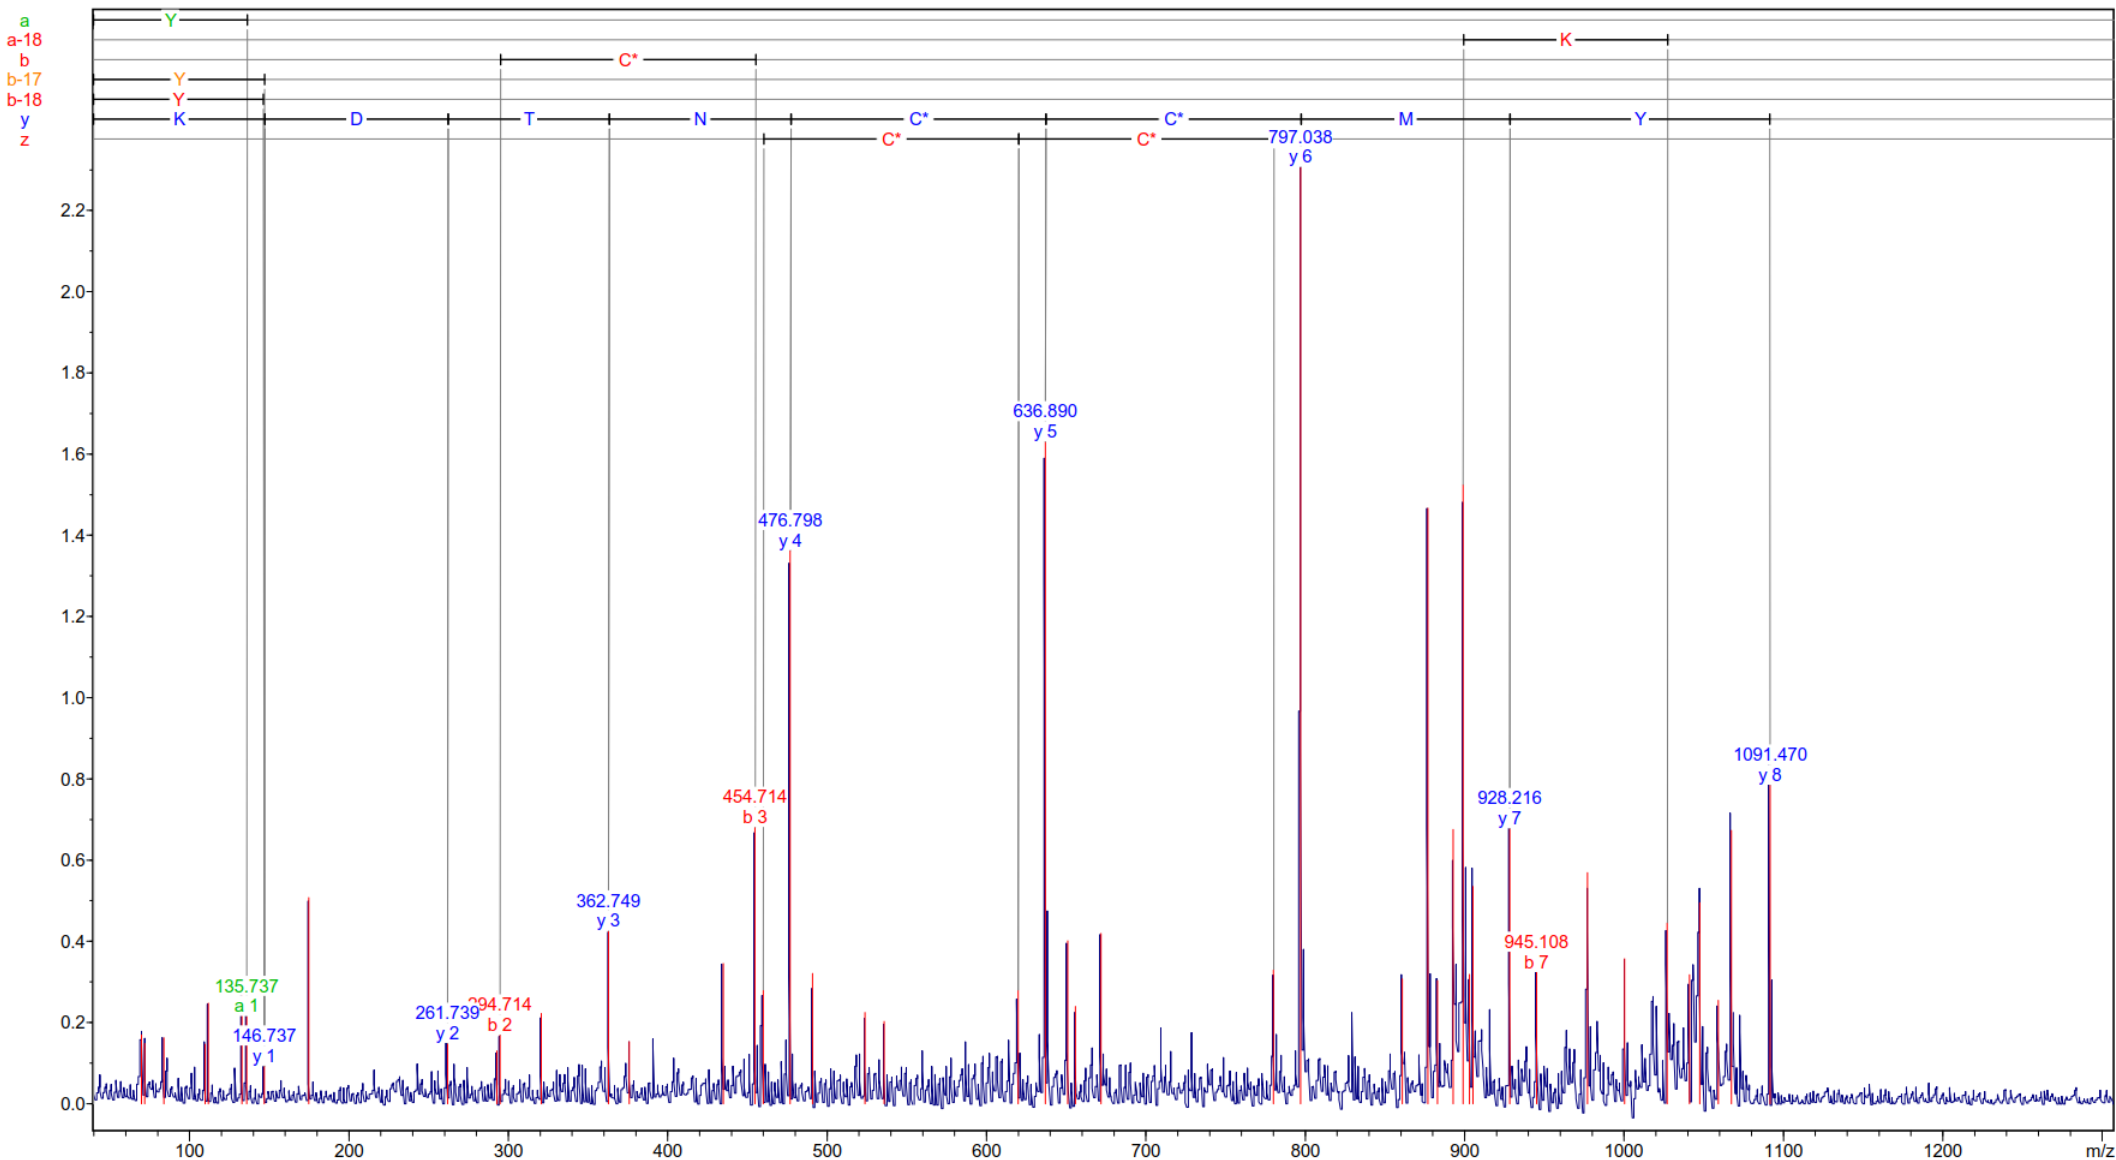

## Spectrum Analysis Report

### Display Parameter:

|                   |          |                     |       |                  |          |                  |          |
|-------------------|----------|---------------------|-------|------------------|----------|------------------|----------|
| Parentmass:       | 1091.463 | Mass Error:         | 0.067 | MH+ (mono):      | 1091.396 | MH+ (avg):       | 1092.253 |
| Threshold (a.i.): | 0.000    | Tolerance (Da):     | 0.700 | Number of Peaks: | 46       | Above Threshold: | 46       |
| Assigned Peaks:   | 18       | Not assigned Peaks: | 28    |                  |          |                  |          |

### Peaklist:

| Peak | Mass     | Intensity |
|------|----------|-----------|------|----------|-----------|------|----------|-----------|------|----------|-----------|------|----------|-----------|
| 1    | 69.799   | 169.470   | 2    | 71.789   | 148.589   | 3    | 83.795   | 162.922   | 4    | 109.715  | 147.007   | 5    | 111.747  | 248.214   |
| 6    | 132.713  | 266.764   | 7    | 135.737  | 215.294   | 8    | 146.737  | 93.497    | 9    | 174.741  | 507.808   | 10   | 261.739  | 148.937   |
| 11   | 292.688  | 130.228   | 12   | 294.714  | 169.864   | 13   | 320.655  | 222.830   | 14   | 362.749  | 426.180   | 15   | 375.737  | 153.377   |
| 16   | 434.671  | 345.832   | 17   | 454.714  | 681.384   | 18   | 459.798  | 279.757   | 19   | 476.798  | 1363.040  | 20   | 490.723  | 320.870   |
| 21   | 523.757  | 225.132   | 22   | 535.776  | 203.033   | 23   | 619.834  | 279.820   | 24   | 636.890  | 1630.727  | 25   | 650.813  | 401.717   |
| 26   | 655.783  | 240.353   | 27   | 671.721  | 419.344   | 28   | 779.986  | 330.119   | 29   | 797.038  | 2307.387  | 30   | 860.790  | 307.427   |
| 31   | 876.865  | 1467.290  | 32   | 882.891  | 304.013   | 33   | 892.763  | 675.551   | 34   | 898.851  | 1524.235  | 35   | 902.940  | 318.814   |
| 36   | 905.084  | 535.242   | 37   | 928.216  | 677.936   | 38   | 945.108  | 324.530   | 39   | 977.055  | 569.807   | 40   | 1000.339 | 357.250   |
| 41   | 1027.045 | 445.289   | 42   | 1040.965 | 317.907   | 43   | 1047.367 | 495.236   | 44   | 1059.021 | 254.918   | 45   | 1067.204 | 673.158   |
| 46   | 1091.470 | 784.948   |      |          |           |      |          |           |      |          |           |      |          |           |

### Calculated Masses:

YMCCNTDK 3: Carbamidomethyl (C) 4: Carbamidomethyl (C)

| N-Term. | Ion | a              | a-17     | a-18            | b              | b-17           | b-18           | b+18            | c        | i              | x        | y               | z              | C-Term. | Ion |
|---------|-----|----------------|----------|-----------------|----------------|----------------|----------------|-----------------|----------|----------------|----------|-----------------|----------------|---------|-----|
| 1       | Y   | <b>136.076</b> | 119.049  | 118.065         | 164.071        | <b>147.044</b> | <b>146.060</b> | 182.081         | 181.097  | <b>136.076</b> | 173.092  | <b>147.113</b>  | 130.086        | 8       | K   |
| 2       | M   | 267.116        | 250.090  | 249.106         | <b>295.111</b> | 278.085        | 277.101        | 313.122         | 312.138  | 104.053        | 288.119  | <b>262.140</b>  | 245.113        | 7       | D   |
| 3       | C*  | 427.147        | 410.120  | 409.136         | <b>455.142</b> | 438.115        | 437.131        | 473.152         | 472.168  | <b>133.043</b> | 389.167  | <b>363.187</b>  | 346.161        | 6       | T   |
| 4       | C*  | 587.177        | 570.151  | 569.167         | 615.172        | 598.146        | 597.162        | 633.183         | 632.199  | <b>133.043</b> | 503.210  | <b>477.230</b>  | <b>460.204</b> | 5       | N   |
| 5       | N   | 701.220        | 684.194  | 683.210         | 729.215        | 712.189        | 711.205        | 747.226         | 746.242  | 87.055         | 663.240  | <b>637.261</b>  | <b>620.234</b> | 4       | C*  |
| 6       | T   | 802.268        | 785.242  | 784.258         | 830.263        | 813.236        | 812.252        | 848.274         | 847.290  | 74.060         | 823.271  | <b>797.292</b>  | <b>780.265</b> | 3       | C*  |
| 7       | D   | 917.295        | 900.268  | <b>899.284</b>  | <b>945.290</b> | <b>928.263</b> | 927.279        | 963.300         | 962.316  | 88.039         | 954.311  | <b>928.332</b>  | 911.306        | 2       | M   |
| 8       | K   | 1045.390       | 1028.363 | <b>1027.379</b> | 1073.385       | 1056.358       | 1055.374       | <b>1091.395</b> | 1090.411 | 101.107        | 1117.375 | <b>1091.395</b> | 1074.369       | 1       | Y   |

## 3FTx parentmass 948.463

## Spectrum Analysis Report

|                  |         |                   |         |                     |       |                  |         |
|------------------|---------|-------------------|---------|---------------------|-------|------------------|---------|
| Sequence Name:   |         | Parentmass:       | 948.463 | Mass Error:         | 0.034 | MH+ (mono):      | 948.428 |
| MH+ (avg):       | 949.131 | Threshold (a.i.): | 0.000   | Tolerance (Da):     | 0.700 | Number of Peaks: | 39      |
| Above Threshold: | 39      | Assigned Peaks:   | 19      | Not assigned Peaks: | 20    |                  |         |

Abs. Int. \* 1000

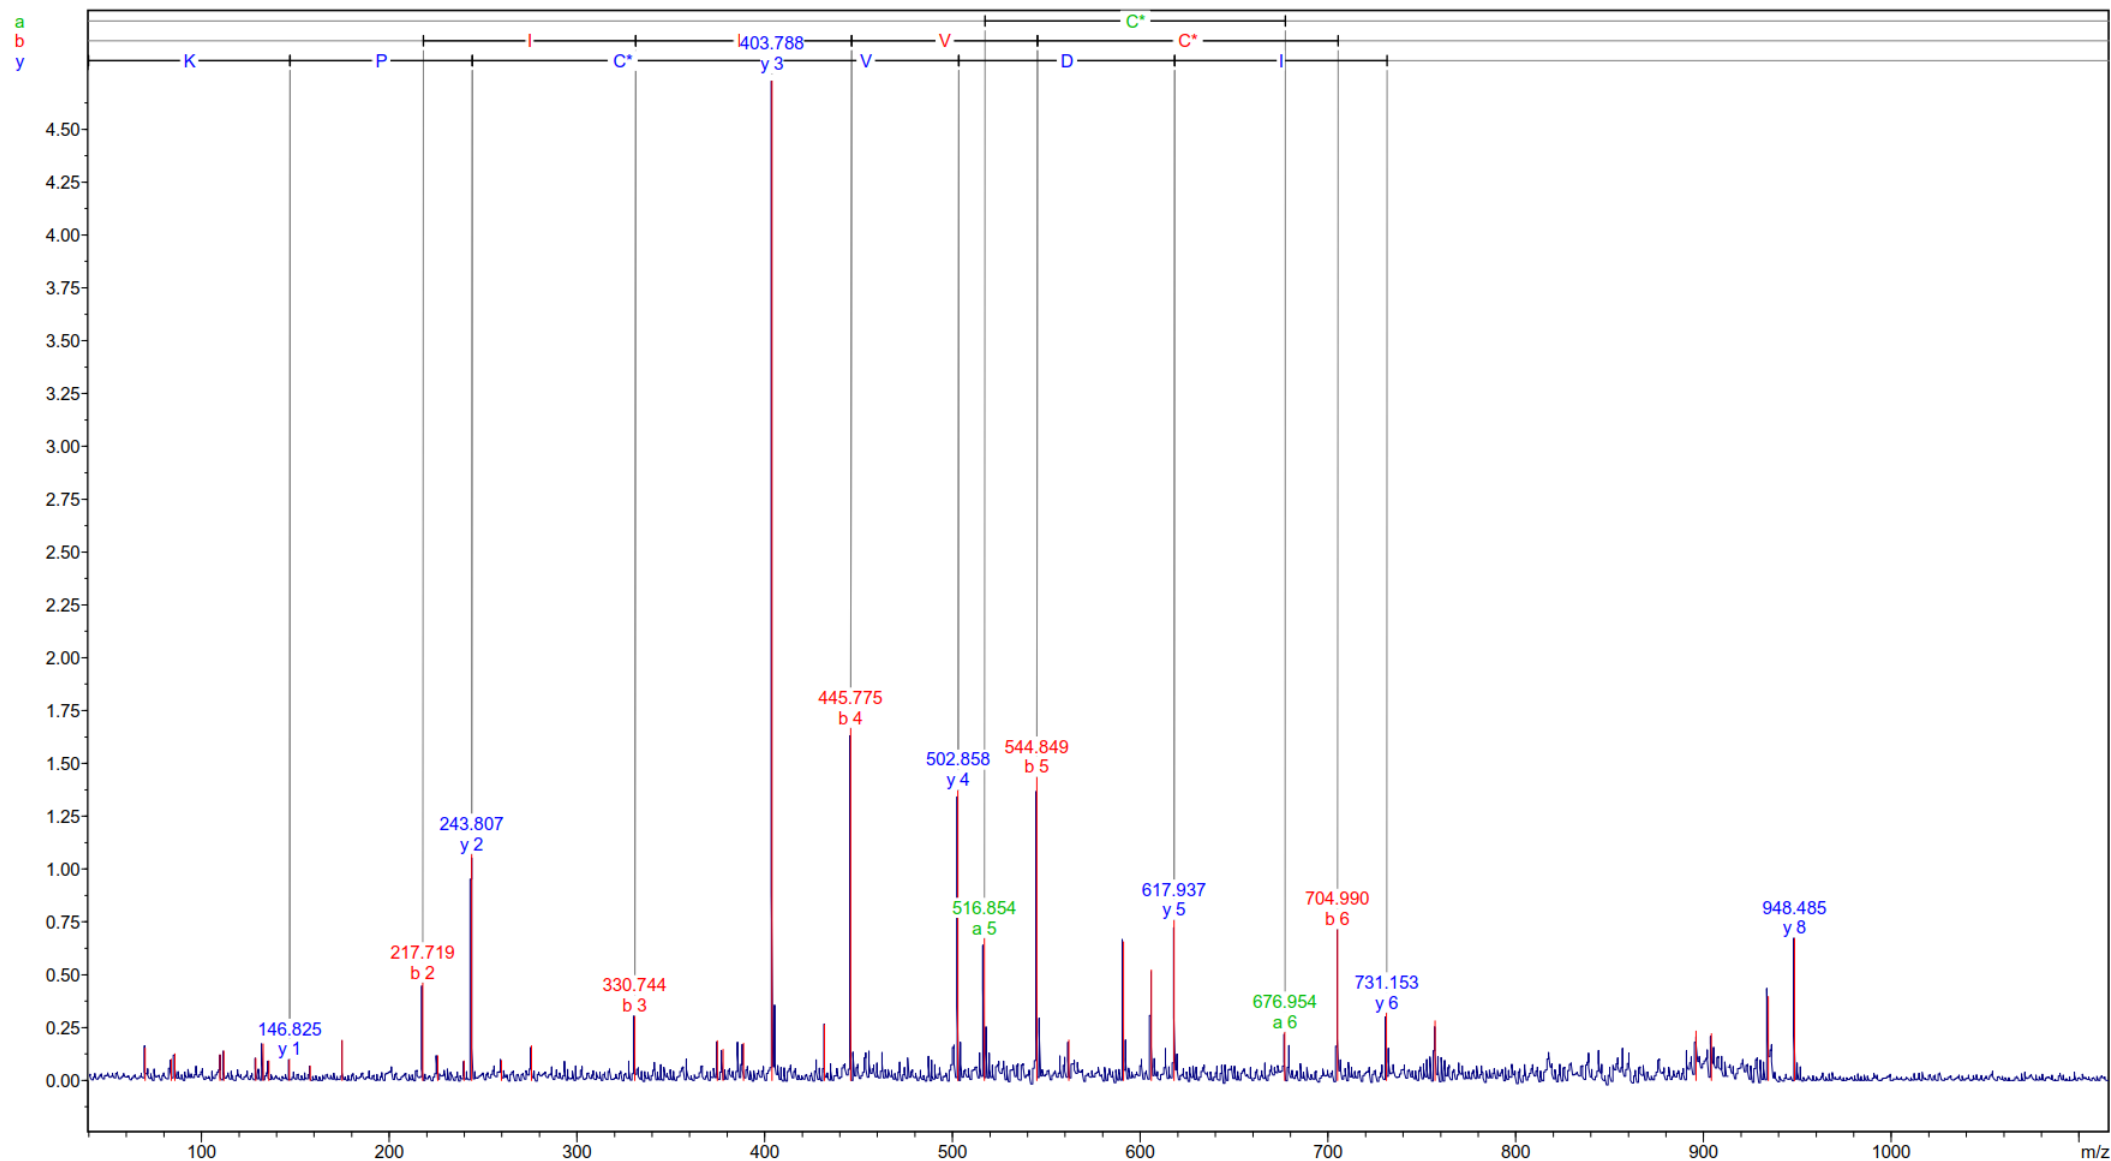

## Spectrum Analysis Report

### Display Parameter:

|                   |         |                     |       |                  |         |                  |         |
|-------------------|---------|---------------------|-------|------------------|---------|------------------|---------|
| Parentmass:       | 948.463 | Mass Error:         | 0.034 | MH+ (mono):      | 948.428 | MH+ (avg):       | 949.131 |
| Threshold (a.i.): | 0.000   | Tolerance (Da):     | 0.700 | Number of Peaks: | 39      | Above Threshold: | 39      |
| Assigned Peaks:   | 19      | Not assigned Peaks: | 20    |                  |         |                  |         |

### Peaklist:

| Peak | Mass    | Intensity |
|------|---------|-----------|------|---------|-----------|------|---------|-----------|------|---------|-----------|------|---------|-----------|
| 1    | 69.860  | 154.388   | 2    | 83.861  | 100.544   | 3    | 85.852  | 126.166   | 4    | 109.805 | 121.565   | 5    | 111.842 | 139.381   |
| 6    | 128.818 | 105.802   | 7    | 132.773 | 174.013   | 8    | 135.800 | 93.532    | 9    | 146.825 | 100.097   | 10   | 157.787 | 68.285    |
| 11   | 174.808 | 190.089   | 12   | 217.719 | 462.413   | 13   | 225.821 | 117.678   | 14   | 239.833 | 93.868    | 15   | 243.807 | 1071.082  |
| 16   | 259.756 | 94.876    | 17   | 275.771 | 164.991   | 18   | 330.744 | 306.964   | 19   | 374.748 | 188.738   | 20   | 377.692 | 148.129   |
| 21   | 388.742 | 176.835   | 22   | 403.788 | 4764.331  | 23   | 431.749 | 264.298   | 24   | 445.775 | 1668.025  | 25   | 502.858 | 1373.920  |
| 26   | 516.854 | 673.048   | 27   | 544.849 | 1436.327  | 28   | 561.847 | 192.147   | 29   | 591.018 | 656.156   | 30   | 605.864 | 522.383   |
| 31   | 617.937 | 758.875   | 32   | 676.954 | 228.938   | 33   | 704.990 | 715.761   | 34   | 731.153 | 319.281   | 35   | 757.003 | 282.325   |
| 36   | 896.050 | 234.152   | 37   | 904.186 | 222.056   | 38   | 934.447 | 396.939   | 39   | 948.485 | 673.669   |      |         |           |

### Calculated Masses:

GCIDVCPK 2: Carbamidomethyl (C) 6: Carbamidomethyl (C)

| N-Term. | Ion | a       | a-17    | a-18    | b       | b-17    | b-18    | b+18    | c       | i       | x       | y       | z       | C-Term. | Ion |
|---------|-----|---------|---------|---------|---------|---------|---------|---------|---------|---------|---------|---------|---------|---------|-----|
| 1       | G   | 30.034  | 13.007  | 12.023  | 58.029  | 41.002  | 40.018  | 76.039  | 75.055  | 30.034  | 173.092 | 147.113 | 130.086 | 8       | K   |
| 2       | C*  | 190.064 | 173.038 | 172.054 | 218.059 | 201.033 | 200.049 | 236.070 | 235.086 | 133.043 | 270.145 | 244.166 | 227.139 | 7       | P   |
| 3       | I   | 303.149 | 286.122 | 285.138 | 331.143 | 314.117 | 313.133 | 349.154 | 348.170 | 86.096  | 430.175 | 404.196 | 387.170 | 6       | C*  |
| 4       | D   | 418.175 | 401.149 | 400.165 | 446.170 | 429.144 | 428.160 | 464.181 | 463.197 | 88.039  | 529.244 | 503.265 | 486.238 | 5       | V   |
| 5       | V   | 517.244 | 500.217 | 499.233 | 545.239 | 528.212 | 527.228 | 563.249 | 562.265 | 72.081  | 644.271 | 618.292 | 601.265 | 4       | D   |
| 6       | C*  | 677.275 | 660.248 | 659.264 | 705.269 | 688.243 | 687.259 | 723.280 | 722.296 | 133.043 | 757.355 | 731.376 | 714.349 | 3       | I   |
| 7       | P   | 774.327 | 757.301 | 756.317 | 802.322 | 785.296 | 784.312 | 820.333 | 819.349 | 70.065  | 917.386 | 891.406 | 874.380 | 2       | C*  |
| 8       | K   | 902.422 | 885.396 | 884.412 | 930.417 | 913.391 | 912.407 | 948.428 | 947.444 | 101.107 | 974.407 | 948.428 | 931.401 | 1       | G   |

## 3FTx parentmass 1060.609

## Spectrum Analysis Report

|                  |          |                   |          |                     |       |                  |          |
|------------------|----------|-------------------|----------|---------------------|-------|------------------|----------|
| Sequence Name:   |          | Parentmass:       | 1060.609 | Mass Error:         | 0.189 | MH+ (mono):      | 1060.419 |
| MH+ (avg):       | 1061.175 | Threshold (a.i.): | 0.000    | Tolerance (Da):     | 0.700 | Number of Peaks: | 55       |
| Above Threshold: | 55       | Assigned Peaks:   | 24       | Not assigned Peaks: | 31    |                  |          |

Abs. Int. \* 1000

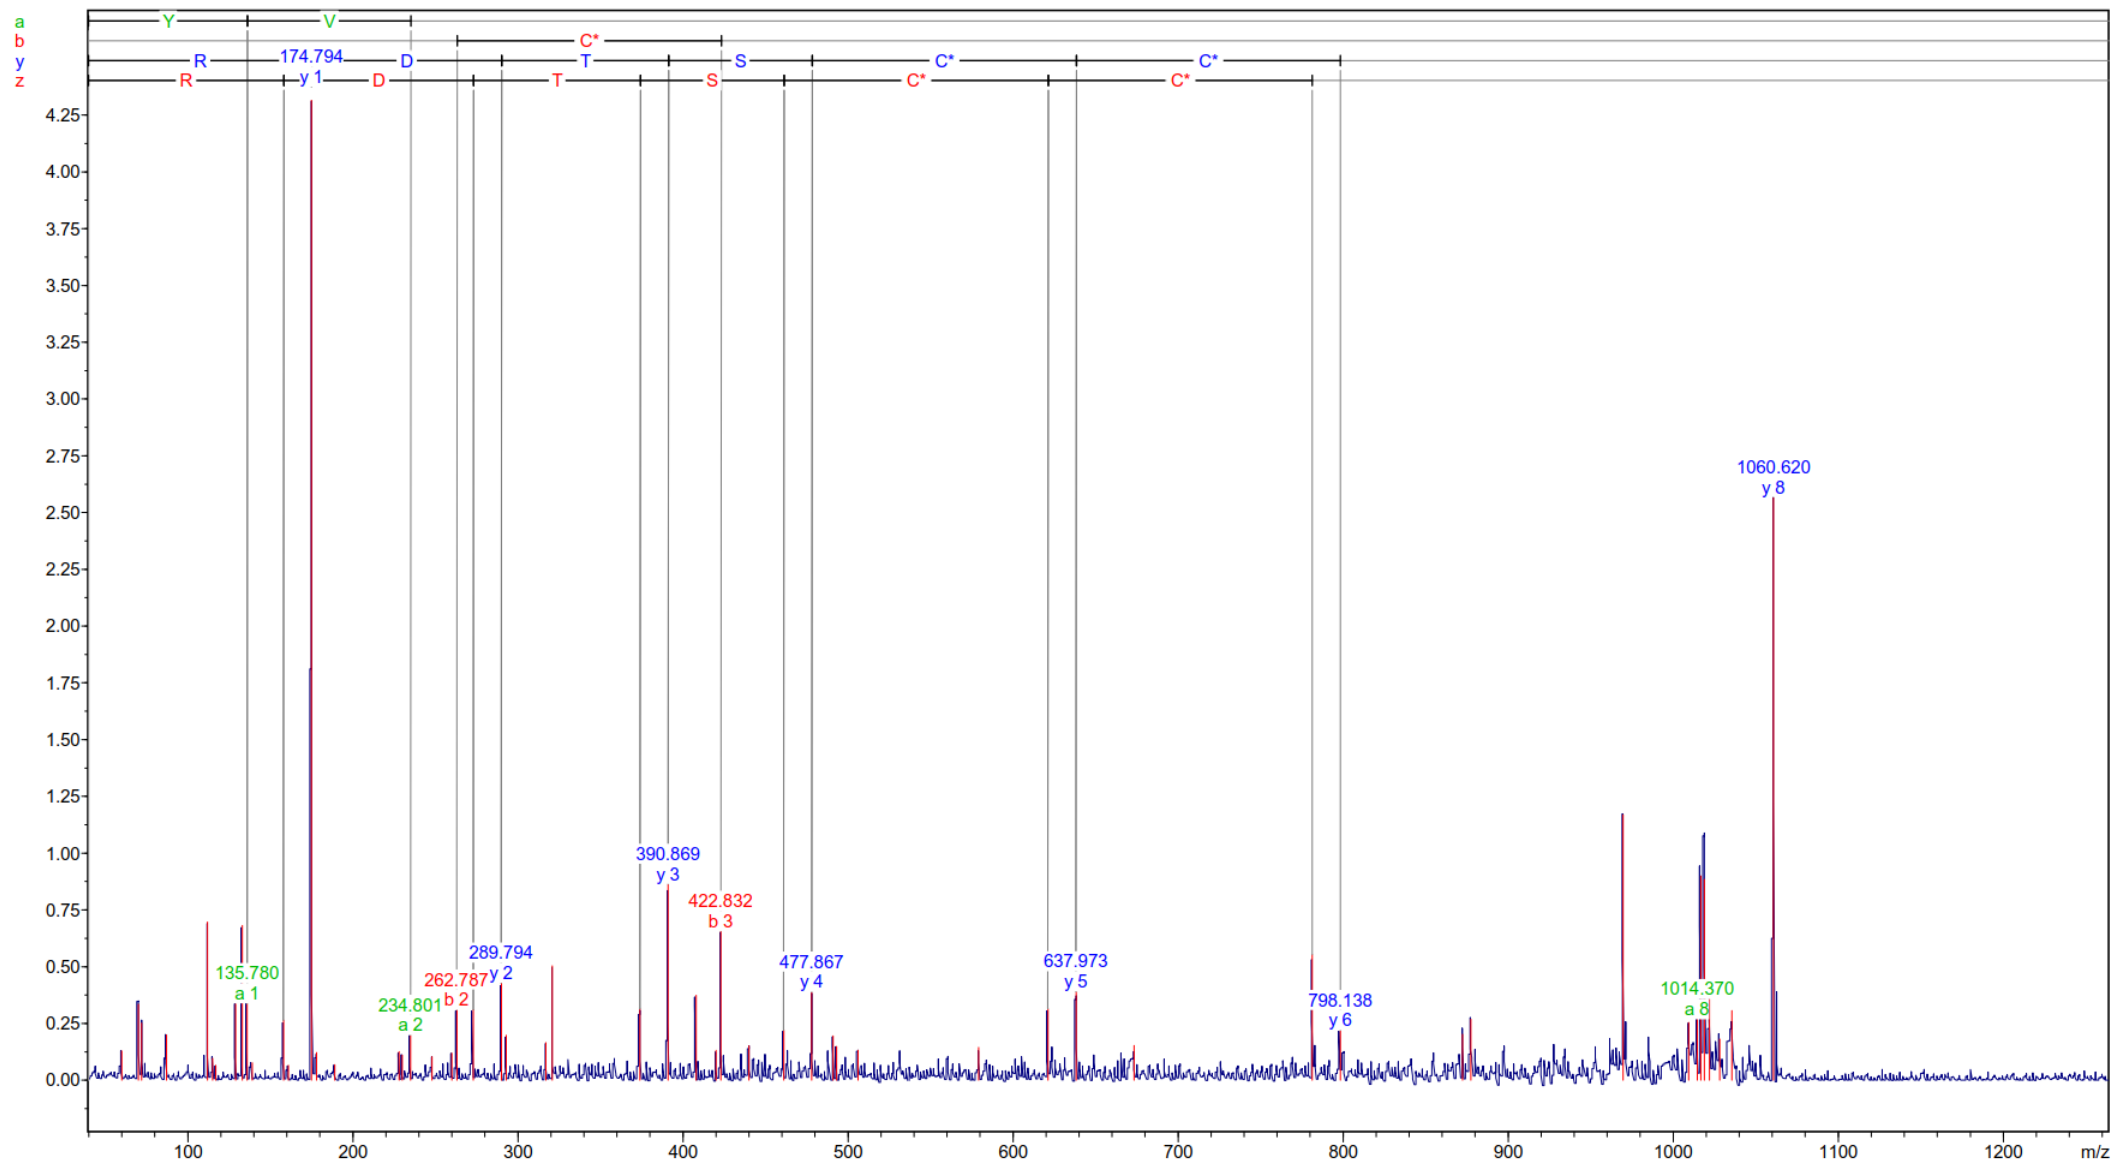

## Spectrum Analysis Report

### Display Parameter:

|                   |          |                     |       |                  |          |                  |          |
|-------------------|----------|---------------------|-------|------------------|----------|------------------|----------|
| Parentmass:       | 1060.609 | Mass Error:         | 0.189 | MH+ (mono):      | 1060.419 | MH+ (avg):       | 1061.175 |
| Threshold (a.i.): | 0.000    | Tolerance (Da):     | 0.700 | Number of Peaks: | 55       | Above Threshold: | 55       |
| Assigned Peaks:   | 24       | Not assigned Peaks: | 31    |                  |          |                  |          |

### Peaklist:

| Peak | Mass     | Intensity |
|------|----------|-----------|------|----------|-----------|------|----------|-----------|------|----------|-----------|------|----------|-----------|
| 1    | 59.825   | 128.889   | 2    | 69.831   | 334.017   | 3    | 71.842   | 251.479   | 4    | 86.841   | 199.911   | 5    | 111.814  | 697.197   |
| 6    | 114.791  | 96.946    | 7    | 116.834  | 64.977    | 8    | 128.809  | 336.610   | 9    | 132.753  | 680.984   | 10   | 135.780  | 337.961   |
| 11   | 138.760  | 76.719    | 12   | 157.777  | 263.592   | 13   | 160.736  | 65.463    | 14   | 174.794  | 4374.412  | 15   | 177.769  | 121.544   |
| 16   | 188.754  | 67.896    | 17   | 227.778  | 125.799   | 18   | 229.736  | 110.110   | 19   | 234.801  | 198.562   | 20   | 247.760  | 102.893   |
| 21   | 259.781  | 118.671   | 22   | 262.787  | 309.744   | 23   | 272.766  | 310.083   | 24   | 289.794  | 428.417   | 25   | 292.729  | 198.671   |
| 26   | 316.738  | 165.415   | 27   | 320.721  | 503.291   | 28   | 373.820  | 314.522   | 29   | 390.869  | 864.113   | 30   | 407.765  | 374.259   |
| 31   | 419.800  | 131.249   | 32   | 422.832  | 656.285   | 33   | 439.869  | 150.791   | 34   | 460.866  | 220.209   | 35   | 477.867  | 388.598   |
| 36   | 490.824  | 194.732   | 37   | 492.829  | 149.288   | 38   | 505.931  | 132.345   | 39   | 578.904  | 145.086   | 40   | 620.934  | 314.761   |
| 41   | 637.973  | 389.948   | 42   | 673.115  | 152.727   | 43   | 781.109  | 552.652   | 44   | 798.138  | 219.322   | 45   | 872.246  | 201.526   |
| 46   | 877.211  | 268.468   | 47   | 969.470  | 1168.553  | 48   | 1009.167 | 254.906   | 49   | 1014.370 | 268.041   | 50   | 1016.585 | 899.596   |
| 51   | 1018.739 | 883.555   | 52   | 1021.855 | 387.639   | 53   | 1028.007 | 181.682   | 54   | 1035.261 | 306.428   | 55   | 1060.620 | 2567.401  |

### Calculated Masses:

YVCCSTDR 3: Carbamidomethyl (C) 4: Carbamidomethyl (C)

| N-Term. | Ion | a        | a-17    | a-18    | b        | b-17     | b-18     | b+18     | c        | i       | x        | y        | z        | C-Term. | Ion |
|---------|-----|----------|---------|---------|----------|----------|----------|----------|----------|---------|----------|----------|----------|---------|-----|
| 1       | Y   | 136.076  | 119.049 | 118.065 | 164.071  | 147.044  | 146.060  | 182.081  | 181.097  | 136.076 | 201.098  | 175.119  | 158.092  | 8       | R   |
| 2       | V   | 235.144  | 218.118 | 217.134 | 263.139  | 246.112  | 245.128  | 281.150  | 280.166  | 72.081  | 316.125  | 290.146  | 273.119  | 7       | D   |
| 3       | C*  | 395.175  | 378.148 | 377.164 | 423.170  | 406.143  | 405.159  | 441.180  | 440.196  | 133.043 | 417.173  | 391.194  | 374.167  | 6       | T   |
| 4       | C*  | 555.205  | 538.179 | 537.195 | 583.200  | 566.174  | 565.190  | 601.211  | 600.227  | 133.043 | 504.205  | 478.226  | 461.199  | 5       | S   |
| 5       | S   | 642.237  | 625.211 | 624.227 | 670.232  | 653.206  | 652.222  | 688.243  | 687.259  | 60.044  | 664.236  | 638.256  | 621.230  | 4       | C*  |
| 6       | T   | 743.285  | 726.259 | 725.275 | 771.280  | 754.253  | 753.269  | 789.291  | 788.307  | 74.060  | 824.266  | 798.287  | 781.260  | 3       | C*  |
| 7       | D   | 858.312  | 841.286 | 840.301 | 886.307  | 869.280  | 868.296  | 904.318  | 903.334  | 88.039  | 923.335  | 897.355  | 880.329  | 2       | V   |
| 8       | R   | 1014.413 | 997.387 | 996.403 | 1042.408 | 1025.382 | 1024.398 | 1060.419 | 1059.435 | 129.113 | 1086.398 | 1060.419 | 1043.392 | 1       | Y   |

## 3FTx parentmass 1118.459

## Spectrum Analysis Report

|                  |          |                   |          |                     |       |                  |          |
|------------------|----------|-------------------|----------|---------------------|-------|------------------|----------|
| Sequence Name:   |          | Parentmass:       | 1118.459 | Mass Error:         | 0.071 | MH+ (mono):      | 1118.388 |
| MH+ (avg):       | 1119.168 | Threshold (a.i.): | 0.000    | Tolerance (Da):     | 0.700 | Number of Peaks: | 44       |
| Above Threshold: | 44       | Assigned Peaks:   | 15       | Not assigned Peaks: | 29    |                  |          |

Abs. Int. \* 1000

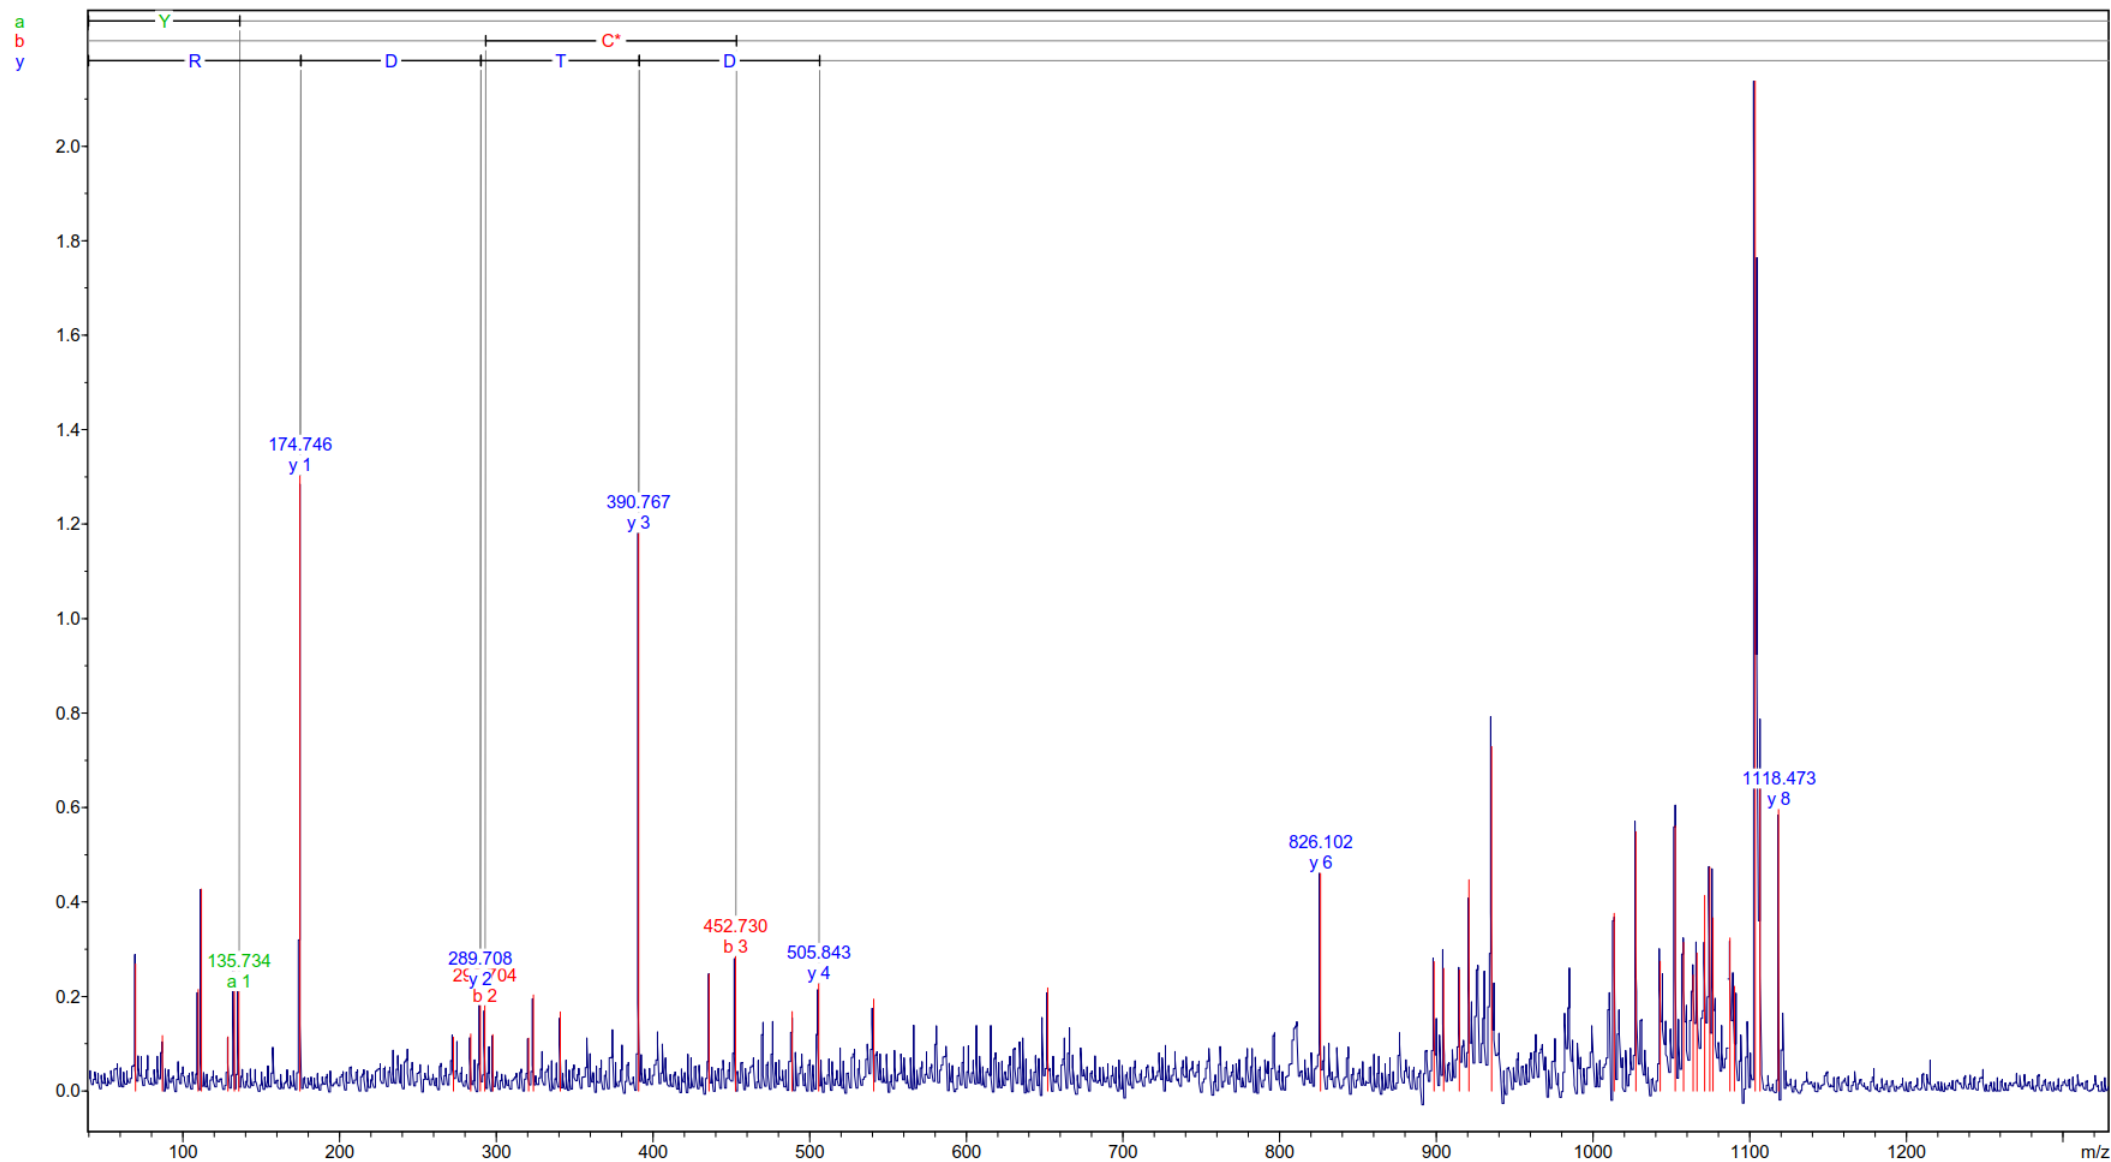

## Spectrum Analysis Report

### Display Parameter:

|                   |          |                     |       |                  |          |                  |          |
|-------------------|----------|---------------------|-------|------------------|----------|------------------|----------|
| Parentmass:       | 1118.459 | Mass Error:         | 0.071 | MH+ (mono):      | 1118.388 | MH+ (avg):       | 1119.168 |
| Threshold (a.i.): | 0.000    | Tolerance (Da):     | 0.700 | Number of Peaks: | 44       | Above Threshold: | 44       |
| Assigned Peaks:   | 15       | Not assigned Peaks: | 29    |                  |          |                  |          |

### Peaklist:

| Peak | Mass     | Intensity |
|------|----------|-----------|------|----------|-----------|------|----------|-----------|------|----------|-----------|------|----------|-----------|
| 1    | 69.803   | 269.169   | 2    | 86.826   | 117.571   | 3    | 109.742  | 214.827   | 4    | 111.781  | 427.759   | 5    | 128.792  | 114.594   |
| 6    | 132.705  | 266.152   | 7    | 135.734  | 210.610   | 8    | 174.746  | 1303.356  | 9    | 272.738  | 114.062   | 10   | 283.745  | 120.885   |
| 11   | 289.708  | 215.401   | 12   | 292.704  | 181.013   | 13   | 297.733  | 119.391   | 14   | 320.625  | 112.393   | 15   | 323.731  | 203.248   |
| 16   | 340.749  | 167.842   | 17   | 390.767  | 1181.407  | 18   | 435.694  | 247.740   | 19   | 452.730  | 285.506   | 20   | 488.787  | 168.645   |
| 21   | 505.843  | 228.099   | 22   | 540.847  | 194.811   | 23   | 651.941  | 218.496   | 24   | 826.102  | 461.865   | 25   | 898.645  | 274.336   |
| 26   | 904.755  | 259.915   | 27   | 914.703  | 256.181   | 28   | 920.790  | 447.162   | 29   | 935.339  | 729.268   | 30   | 1013.573 | 376.029   |
| 31   | 1027.367 | 549.117   | 32   | 1042.930 | 274.385   | 33   | 1052.458 | 561.553   | 34   | 1057.705 | 314.696   | 35   | 1063.894 | 245.854   |
| 36   | 1066.328 | 292.348   | 37   | 1071.267 | 414.438   | 38   | 1074.496 | 473.651   | 39   | 1076.654 | 366.779   | 40   | 1087.460 | 323.889   |
| 41   | 1090.190 | 221.745   | 42   | 1103.561 | 2413.247  | 43   | 1106.561 | 657.327   | 44   | 1118.473 | 596.768   |      |          |           |

### Calculated Masses:

YECCDTDR 3: Carbamidomethyl (C) 4: Carbamidomethyl (C)

| N-Term. | Ion | a              | a-17           | a-18           | b              | b-17           | b-18           | b+18            | c        | i              | x        | y               | z              | C-Term. | Ion |
|---------|-----|----------------|----------------|----------------|----------------|----------------|----------------|-----------------|----------|----------------|----------|-----------------|----------------|---------|-----|
| 1       | Y   | <b>136.076</b> | 119.049        | 118.065        | 164.071        | 147.044        | 146.060        | 182.081         | 181.097  | <b>136.076</b> | 201.098  | <b>175.119</b>  | 158.092        | 8       | R   |
| 2       | E   | 265.118        | 248.092        | 247.108        | <b>293.113</b> | 276.087        | 275.103        | 311.124         | 310.140  | 102.055        | 316.125  | <b>290.146</b>  | <b>273.119</b> | 7       | D   |
| 3       | C*  | 425.149        | 408.122        | 407.138        | <b>453.144</b> | <b>436.117</b> | <b>435.133</b> | 471.154         | 470.170  | <b>133.043</b> | 417.173  | <b>391.194</b>  | 374.167        | 6       | T   |
| 4       | C*  | 585.180        | 568.153        | 567.169        | 613.174        | 596.148        | 595.164        | 631.185         | 630.201  | <b>133.043</b> | 532.200  | <b>506.221</b>  | <b>489.194</b> | 5       | D   |
| 5       | D   | 700.207        | 683.180        | 682.196        | 728.201        | 711.175        | 710.191        | 746.212         | 745.228  | 88.039         | 692.230  | 666.251         | 649.225        | 4       | C*  |
| 6       | T   | 801.254        | 784.228        | 783.244        | 829.249        | 812.223        | 811.239        | 847.260         | 846.276  | 74.060         | 852.261  | <b>826.282</b>  | 809.255        | 3       | C*  |
| 7       | D   | 916.281        | <b>899.255</b> | <b>898.271</b> | 944.276        | 927.250        | 926.265        | 962.287         | 961.303  | 88.039         | 981.304  | 955.324         | 938.298        | 2       | E   |
| 8       | R   | 1072.382       | 1055.356       | 1054.372       | 1100.377       | 1083.351       | 1082.367       | <b>1118.388</b> | 1117.404 | <b>129.113</b> | 1144.367 | <b>1118.388</b> | 1101.361       | 1       | Y   |

## 3FTx parentmass 1020.337

## Spectrum Analysis Report

|                  |          |                   |          |                     |        |                  |          |
|------------------|----------|-------------------|----------|---------------------|--------|------------------|----------|
| Sequence Name:   | 1021.200 | Parentmass:       | 1020.337 | Mass Error:         | -0.135 | MH+ (mono):      | 1020.472 |
| MH+ (avg):       | 1021.200 | Threshold (a.i.): | 0.000    | Tolerance (Da):     | 0.700  | Number of Peaks: | 64       |
| Above Threshold: | 64       | Assigned Peaks:   | 39       | Not assigned Peaks: | 25     |                  |          |

Abs. Int. \* 1000

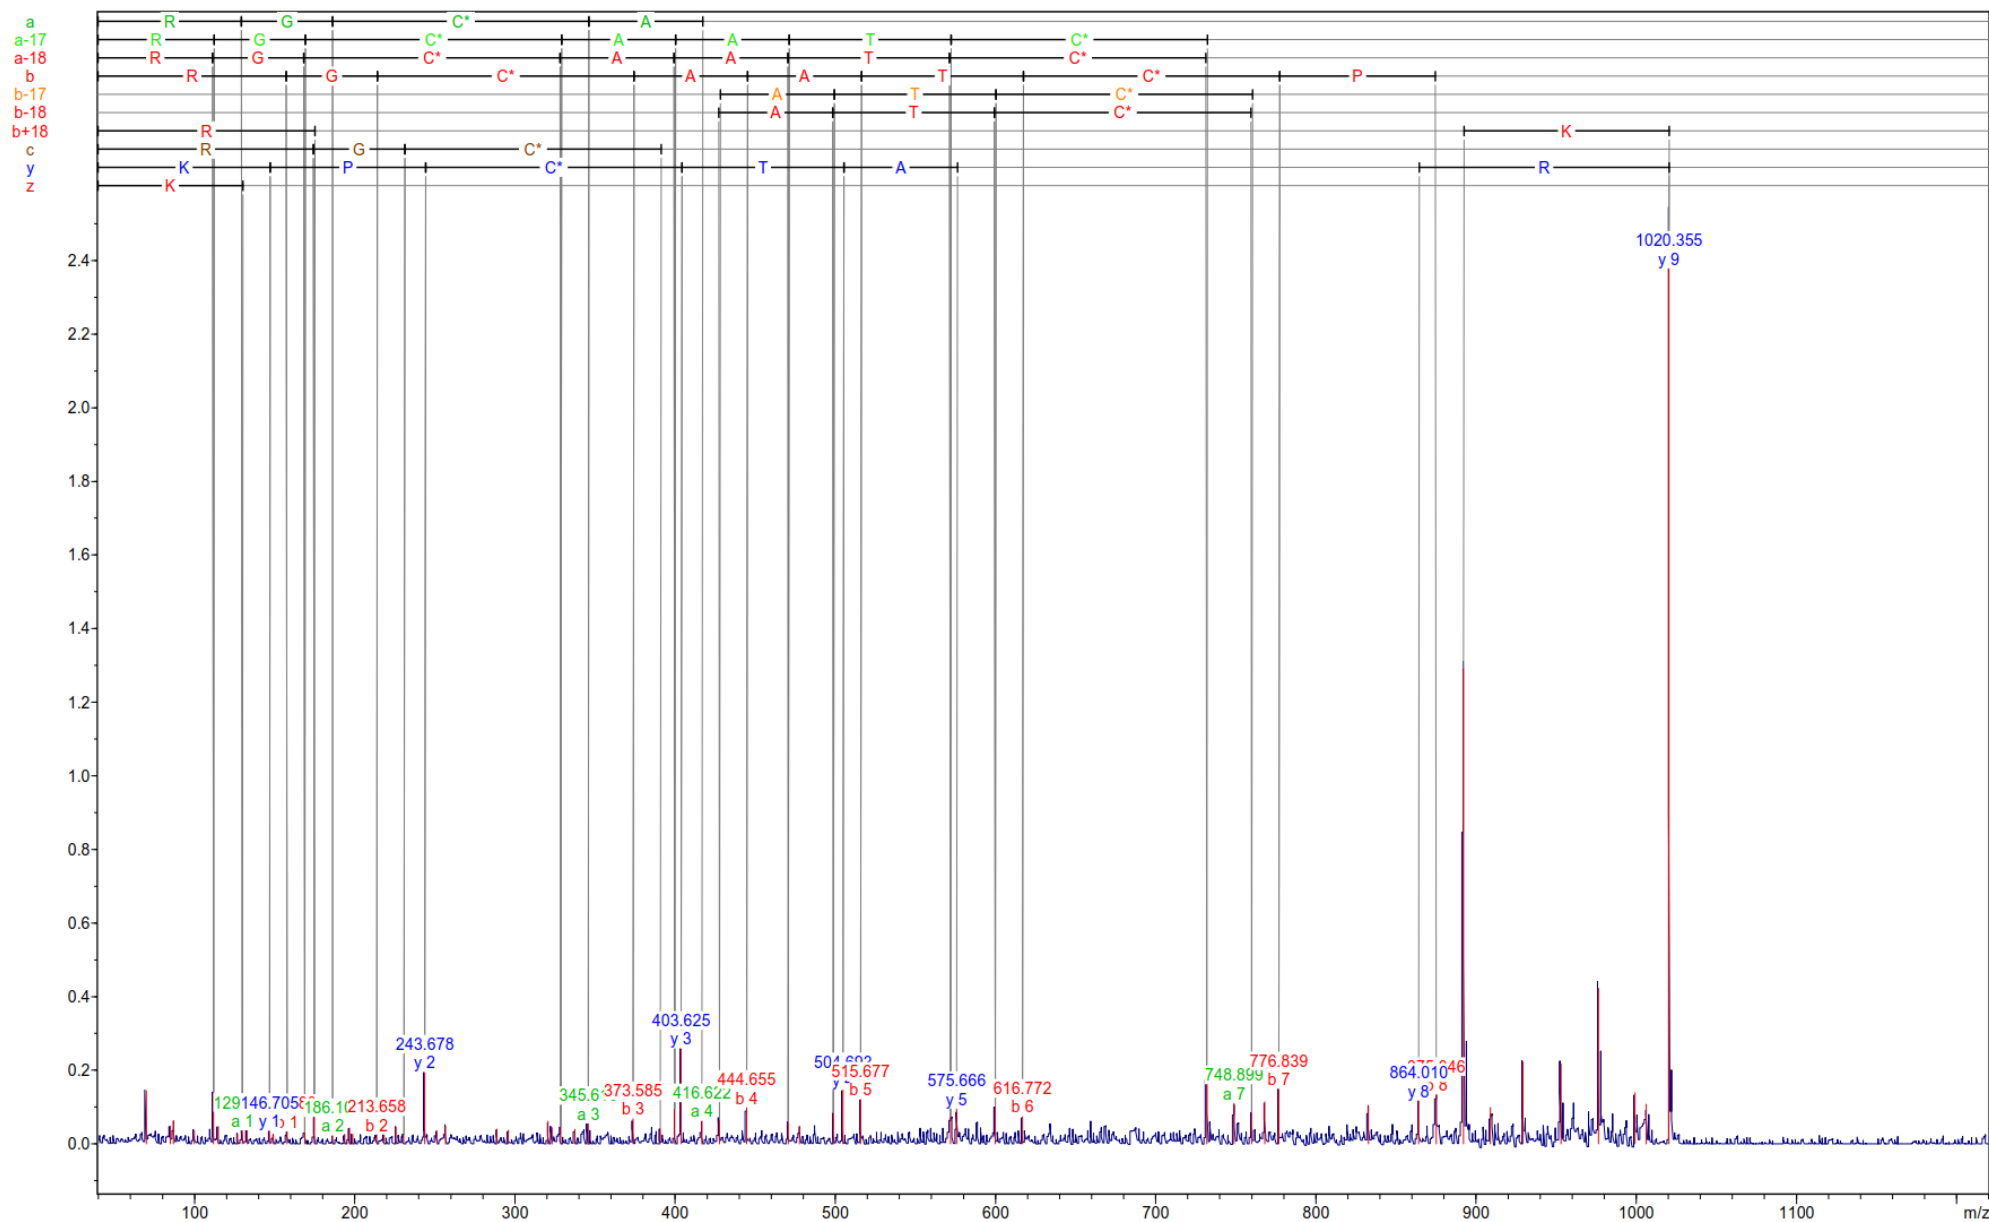

# Spectrum Analysis Report

## Display Parameter:

Parentmass: 1020.337 Mass Error: -0.135 MH+ (mono): 1020.472 MH+ (avg): 1021.200  
 Threshold (a.i.): 0.000 Tolerance (Da): 0.700 Number of Peaks: 64 Above Threshold: 64  
 Assigned Peaks: 39 Not assigned Peaks: 25

## Peaklist:

| Peak | Mass    | Intensity | Peak | Mass    | Intensity | Peak | Mass     | Intensity | Peak | Mass     | Intensity | Peak | Mass    | Intensity |
|------|---------|-----------|------|---------|-----------|------|----------|-----------|------|----------|-----------|------|---------|-----------|
| 1    | 69.770  | 144.802   | 2    | 84.740  | 48.045    | 3    | 86.777   | 62.734    | 4    | 99.722   | 36.840    | 5    | 111.732 | 142.502   |
| 6    | 114.702 | 47.008    | 7    | 126.733 | 26.349    | 8    | 129.688  | 36.707    | 9    | 132.650  | 67.770    | 10   | 146.705 | 35.700    |
| 11   | 149.164 | 26.015    | 12   | 157.680 | 33.946    | 13   | 168.672  | 32.304    | 14   | 174.668  | 136.779   | 15   | 186.109 | 22.455    |
| 16   | 193.589 | 25.314    | 17   | 196.657 | 42.778    | 18   | 198.662  | 26.498    | 19   | 213.658  | 25.323    | 20   | 218.156 | 26.462    |
| 21   | 225.665 | 45.723    | 22   | 230.513 | 26.101    | 23   | 243.678  | 194.956   | 24   | 251.245  | 35.261    | 25   | 256.690 | 48.510    |
| 26   | 288.643 | 40.203    | 27   | 295.828 | 36.869    | 28   | 320.520  | 61.189    | 29   | 323.060  | 43.777    | 30   | 328.586 | 47.395    |
| 31   | 337.273 | 39.271    | 32   | 345.616 | 55.606    | 33   | 373.585  | 68.189    | 34   | 390.704  | 40.420    | 35   | 399.609 | 95.983    |
| 36   | 403.625 | 259.448   | 37   | 416.622 | 62.664    | 38   | 427.581  | 66.607    | 39   | 444.655  | 98.740    | 40   | 470.624 | 60.573    |
| 41   | 477.633 | 48.187    | 42   | 498.647 | 85.370    | 43   | 504.693  | 147.037   | 44   | 515.677  | 121.654   | 45   | 571.750 | 75.232    |
| 46   | 575.666 | 95.366    | 47   | 599.709 | 102.440   | 48   | 616.772  | 74.386    | 49   | 731.811  | 177.072   | 50   | 748.899 | 111.331   |
| 51   | 759.838 | 86.062    | 52   | 767.979 | 114.714   | 53   | 776.839  | 149.787   | 54   | 832.678  | 103.521   | 55   | 864.010 | 117.710   |
| 56   | 875.046 | 133.949   | 57   | 892.045 | 1291.449  | 58   | 908.913  | 98.592    | 59   | 929.219  | 222.523   | 60   | 952.981 | 217.247   |
| 61   | 976.288 | 422.563   | 62   | 999.086 | 138.402   | 63   | 1006.155 | 107.263   | 64   | 1020.355 | 2378.402  |      |         |           |

## Calculated Masses:

RGCAATCPK 3: Carbamidomethyl (C) 7: Carbamidomethyl (C)

| N-Term. | Ion | a       | a-17    | a-18    | b        | b-17    | b-18    | b+18     | c        | i       | x        | y        | z        | C-Term. | Ion |
|---------|-----|---------|---------|---------|----------|---------|---------|----------|----------|---------|----------|----------|----------|---------|-----|
| 1       | R   | 129.113 | 112.087 | 111.103 | 157.108  | 140.082 | 139.098 | 175.119  | 174.135  | 129.113 | 173.092  | 147.113  | 130.086  | 9       | K   |
| 2       | G   | 186.135 | 169.108 | 168.124 | 214.130  | 197.103 | 196.119 | 232.140  | 231.156  | 30.034  | 270.145  | 244.166  | 227.139  | 8       | P   |
| 3       | C*  | 346.166 | 329.139 | 328.155 | 374.160  | 357.134 | 356.150 | 392.171  | 391.187  | 133.043 | 430.175  | 404.196  | 387.170  | 7       | C*  |
| 4       | A   | 417.203 | 400.176 | 399.192 | 445.198  | 428.171 | 427.187 | 463.208  | 462.224  | 44.049  | 531.223  | 505.244  | 488.217  | 6       | T   |
| 5       | A   | 488.240 | 471.213 | 470.229 | 516.235  | 499.208 | 498.224 | 534.245  | 533.261  | 44.049  | 602.260  | 576.281  | 559.254  | 5       | A   |
| 6       | T   | 589.287 | 572.261 | 571.277 | 617.282  | 600.256 | 599.272 | 635.293  | 634.309  | 74.060  | 673.297  | 647.318  | 630.292  | 4       | A   |
| 7       | C*  | 749.318 | 732.292 | 731.308 | 777.313  | 760.287 | 759.302 | 795.324  | 794.340  | 133.043 | 833.328  | 807.349  | 790.322  | 3       | C*  |
| 8       | P   | 846.371 | 829.344 | 828.360 | 874.366  | 857.339 | 856.355 | 892.376  | 891.392  | 70.065  | 890.349  | 864.370  | 847.344  | 2       | G   |
| 9       | K   | 974.466 | 957.439 | 956.455 | 1002.461 | 985.434 | 984.450 | 1020.471 | 1019.487 | 101.107 | 1046.451 | 1020.471 | 1003.445 | 1       | R   |

## 3FTx parentmass 1319.692

## Spectrum Analysis Report

|                  |          |                   |          |                     |       |                  |          |
|------------------|----------|-------------------|----------|---------------------|-------|------------------|----------|
| Sequence Name:   |          | Parentmass:       | 1319.692 | Mass Error:         | 0.109 | MH+ (mono):      | 1319.584 |
| MH+ (avg):       | 1320.481 | Threshold (a.i.): | 0.000    | Tolerance (Da):     | 0.700 | Number of Peaks: | 51       |
| Above Threshold: | 51       | Assigned Peaks:   | 28       | Not assigned Peaks: | 23    |                  |          |

Abs. Int. \* 1000

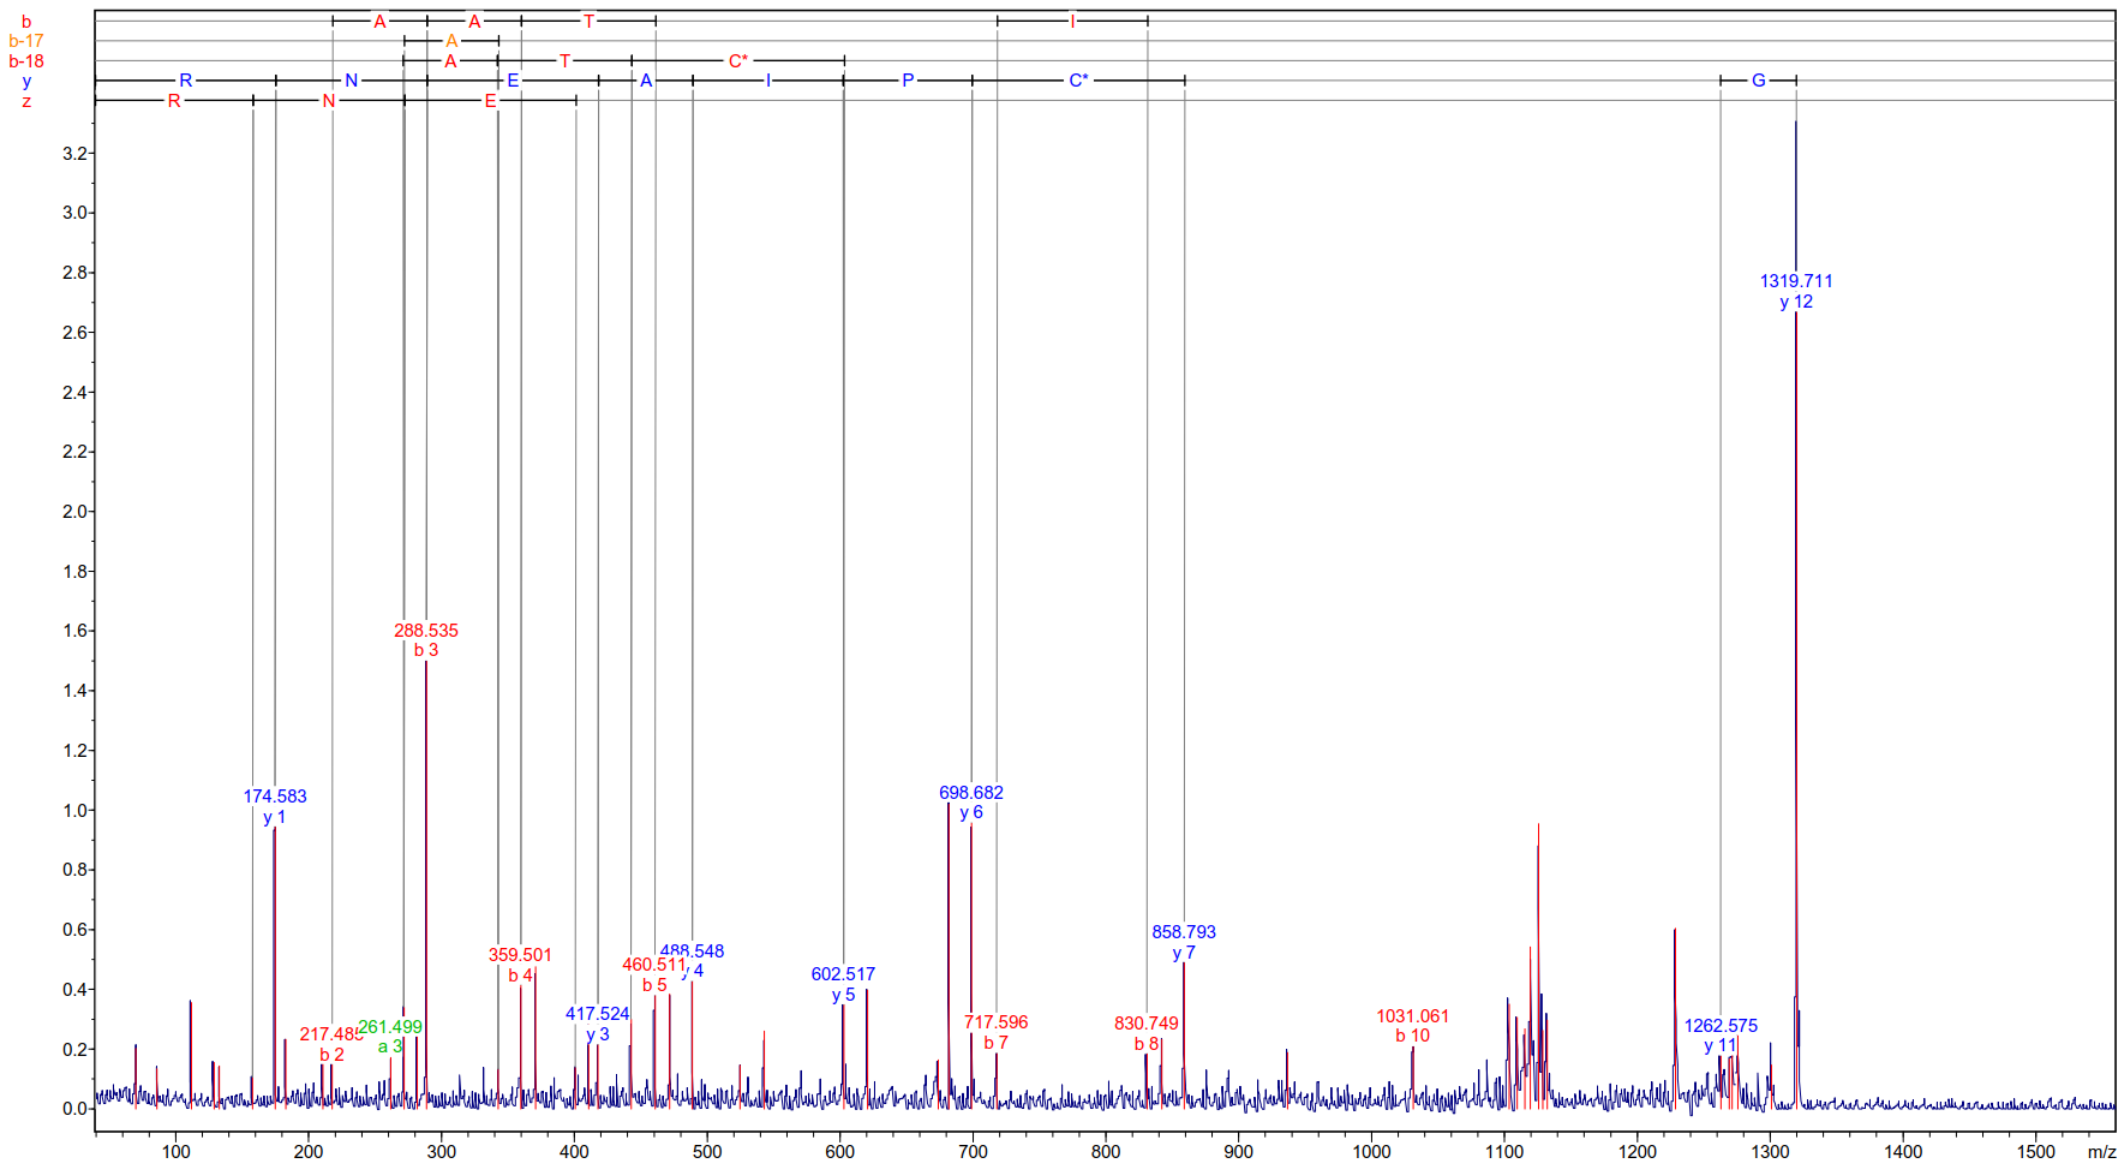

## Spectrum Analysis Report

### Display Parameter:

|                   |          |                     |       |                  |          |                  |          |
|-------------------|----------|---------------------|-------|------------------|----------|------------------|----------|
| Parentmass:       | 1319.692 | Mass Error:         | 0.109 | MH+ (mono):      | 1319.584 | MH+ (avg):       | 1320.481 |
| Threshold (a.i.): | 0.000    | Tolerance (Da):     | 0.700 | Number of Peaks: | 51       | Above Threshold: | 51       |
| Assigned Peaks:   | 28       | Not assigned Peaks: | 23    |                  |          |                  |          |

### Peaklist:

| Peak | Mass     | Intensity |
|------|----------|-----------|------|----------|-----------|------|----------|-----------|------|----------|-----------|------|----------|-----------|
| 1    | 69.685   | 202.634   | 2    | 85.677   | 134.798   | 3    | 111.637  | 356.834   | 4    | 128.682  | 156.328   | 5    | 132.539  | 144.573   |
| 6    | 157.588  | 105.448   | 7    | 174.583  | 945.366   | 8    | 182.604  | 233.172   | 9    | 210.575  | 192.651   | 10   | 217.485  | 148.804   |
| 11   | 261.499  | 173.469   | 12   | 271.542  | 341.525   | 13   | 281.561  | 281.664   | 14   | 288.535  | 1501.695  | 15   | 342.532  | 133.443   |
| 16   | 359.501  | 414.603   | 17   | 370.520  | 475.939   | 18   | 400.542  | 138.556   | 19   | 410.579  | 292.999   | 20   | 417.524  | 215.524   |
| 21   | 442.483  | 301.054   | 22   | 460.511  | 380.894   | 23   | 471.508  | 384.784   | 24   | 488.548  | 427.756   | 25   | 524.523  | 146.697   |
| 26   | 542.598  | 261.399   | 27   | 602.517  | 349.543   | 28   | 620.509  | 398.273   | 29   | 673.730  | 164.788   | 30   | 681.643  | 1020.264  |
| 31   | 698.682  | 958.186   | 32   | 717.596  | 186.939   | 33   | 830.749  | 185.720   | 34   | 841.804  | 233.459   | 35   | 858.793  | 490.704   |
| 36   | 936.407  | 188.807   | 37   | 1031.061 | 209.920   | 38   | 1103.306 | 350.657   | 39   | 1109.272 | 307.254   | 40   | 1115.233 | 268.674   |
| 41   | 1119.332 | 542.552   | 42   | 1125.567 | 955.701   | 43   | 1128.627 | 263.145   | 44   | 1131.870 | 297.233   | 45   | 1228.484 | 604.868   |
| 46   | 1262.575 | 178.225   | 47   | 1268.949 | 167.319   | 48   | 1271.191 | 210.797   | 49   | 1275.551 | 251.773   | 50   | 1300.658 | 147.245   |
| 51   | 1319.711 | 2669.704  |      |          |           |      |          |           |      |          |           |      |          |           |

### Calculated Masses:

GCAATCPIAENR 2: Carbamidomethyl (C) 6: Carbamidomethyl (C)

| N-Term. | Ion | a        | a-17     | a-18     | b        | b-17     | b-18     | b+18     | c        | i       | x        | y        | z        | C-Term. | Ion |
|---------|-----|----------|----------|----------|----------|----------|----------|----------|----------|---------|----------|----------|----------|---------|-----|
| 1       | G   | 30.034   | 13.007   | 12.023   | 58.029   | 41.002   | 40.018   | 76.039   | 75.055   | 30.034  | 201.098  | 175.119  | 158.092  | 12      | R   |
| 2       | C*  | 190.064  | 173.038  | 172.054  | 218.059  | 201.033  | 200.049  | 236.070  | 235.086  | 133.043 | 315.141  | 289.162  | 272.135  | 11      | N   |
| 3       | A   | 261.102  | 244.075  | 243.091  | 289.097  | 272.070  | 271.086  | 307.107  | 306.123  | 44.049  | 444.184  | 418.204  | 401.178  | 10      | E   |
| 4       | A   | 332.139  | 315.112  | 314.128  | 360.134  | 343.107  | 342.123  | 378.144  | 377.160  | 44.049  | 515.221  | 489.242  | 472.215  | 9       | A   |
| 5       | T   | 433.186  | 416.160  | 415.176  | 461.181  | 444.155  | 443.171  | 479.192  | 478.208  | 74.060  | 628.305  | 602.326  | 585.299  | 8       | I   |
| 6       | C*  | 593.217  | 576.190  | 575.206  | 621.212  | 604.185  | 603.201  | 639.223  | 638.238  | 133.043 | 725.358  | 699.378  | 682.352  | 7       | P   |
| 7       | P   | 690.270  | 673.243  | 672.259  | 718.265  | 701.238  | 700.254  | 736.275  | 735.291  | 70.065  | 885.388  | 859.409  | 842.383  | 6       | C*  |
| 8       | I   | 803.354  | 786.327  | 785.343  | 831.349  | 814.322  | 813.338  | 849.359  | 848.375  | 86.096  | 986.436  | 960.457  | 943.430  | 5       | T   |
| 9       | A   | 874.391  | 857.364  | 856.380  | 902.386  | 885.359  | 884.375  | 920.396  | 919.412  | 44.049  | 1057.473 | 1031.494 | 1014.467 | 4       | A   |
| 10      | E   | 1003.434 | 986.407  | 985.423  | 1031.428 | 1014.402 | 1013.418 | 1049.439 | 1048.455 | 102.055 | 1128.510 | 1102.531 | 1085.504 | 3       | A   |
| 11      | N   | 1117.476 | 1100.450 | 1099.466 | 1145.471 | 1128.445 | 1127.461 | 1163.482 | 1162.498 | 87.055  | 1288.541 | 1262.562 | 1245.535 | 2       | C*  |
| 12      | R   | 1273.578 | 1256.551 | 1255.567 | 1301.573 | 1284.546 | 1283.562 | 1319.583 | 1318.599 | 129.113 | 1345.562 | 1319.583 | 1302.557 | 1       | G   |
